# Supplementary material for: New insights into the molecular basis of gametogenesis in the hybridogenetic water frog Pelophylax esculentus
Source: Research Square preprint supplement (doi:10.21203/rs.3.rs-6224694/v1), 2025-05-07
Supplement: Supplementary file 1 [file 695fb56be112c3b1f70a16b6.xlsx]

## Sheet: Plate_1
Supplementary material e_1: Sample information
									Coordinates
Pos.	Sample ID	DNA Concentration (ng/µl)	Genotype	Ploidy	Sex	System	Locality	Country	North	East
A1	K_1	345.5	LR	2n	M	R-E	Košatka	Czech Republic	49°44'03.6"N	18°09'28.0"E
B1	K_2	725.3	LR	2n	M	R-E	Košatka	Czech Republic	49°44'03.6"N	18°09'28.0"E
C1	K_3	67.6	LR	2n	M	R-E	Košatka	Czech Republic	49°44'03.6"N	18°09'28.0"E
D1	K_4	414.7	LR	2n	M	R-E	Košatka	Czech Republic	49°44'03.6"N	18°09'28.0"E
E1	K_5	537	LR	2n	M	R-E	Košatka	Czech Republic	49°44'03.6"N	18°09'28.0"E
F1	K_6	461.4	LR	2n	M	R-E	Košatka	Czech Republic	49°44'03.6"N	18°09'28.0"E
G1	K_7	387.9	LR	2n	M	R-E	Košatka	Czech Republic	49°44'03.6"N	18°09'28.0"E
H1	K_8	243.5	LR	2n	M	R-E	Košatka	Czech Republic	49°44'03.6"N	18°09'28.0"E
A2	K_9	242.6	LR	2n	M	R-E	Košatka	Czech Republic	49°44'03.6"N	18°09'28.0"E
B2	K_10	314.3	LR	2n	M	R-E	Košatka	Czech Republic	49°44'03.6"N	18°09'28.0"E
C2	K_11	393.5	LR	2n	M	R-E	Košatka	Czech Republic	49°44'03.6"N	18°09'28.0"E
D2	K_12	315.2	LR	2n	M	R-E	Košatka	Czech Republic	49°44'03.6"N	18°09'28.0"E
E2	K_13	309.9	LR	2n	M	R-E	Košatka	Czech Republic	49°44'03.6"N	18°09'28.0"E
F2	K_14	306.1	LR	2n	M	R-E	Košatka	Czech Republic	49°44'03.6"N	18°09'28.0"E
G2	K_15	437.5	RR		M	R-E	Košatka	Czech Republic	49°44'03.6"N	18°09'28.0"E
H2	K_16	408.2	RR		M	R-E	Košatka	Czech Republic	49°44'03.6"N	18°09'28.0"E
A3	K_17	390.2	RR		M	R-E	Košatka	Czech Republic	49°44'03.6"N	18°09'28.0"E
B3	K_18	502.7	RR		M	R-E	Košatka	Czech Republic	49°44'03.6"N	18°09'28.0"E
C3	K_19	537.4	RR		M	R-E	Košatka	Czech Republic	49°44'03.6"N	18°09'28.0"E
D3	K_20	235.8	RR		M	R-E	Košatka	Czech Republic	49°44'03.6"N	18°09'28.0"E
E3	K_21	706.4	RR		M	R-E	Košatka	Czech Republic	49°44'03.6"N	18°09'28.0"E
F3	K_22	414.3	RR		F	R-E	Košatka	Czech Republic	49°44'03.6"N	18°09'28.0"E
G3	K_23	321.5	RR		F	R-E	Košatka	Czech Republic	49°44'03.6"N	18°09'28.0"E
H3	K_24	349.1	RR		F	R-E	Košatka	Czech Republic	49°44'03.6"N	18°09'28.0"E
A4	K_25	873.1	RR		F	R-E	Košatka	Czech Republic	49°44'03.6"N	18°09'28.0"E
B4	K_26	951.9	RR		F	R-E	Košatka	Czech Republic	49°44'03.6"N	18°09'28.0"E
C4	K_27	710.4	RR		F	R-E	Košatka	Czech Republic	49°44'03.6"N	18°09'28.0"E
D4	K_28	743.1	RR		F	R-E	Košatka	Czech Republic	49°44'03.6"N	18°09'28.0"E
E4	K_29	398.6	RR		F	R-E	Košatka	Czech Republic	49°44'03.6"N	18°09'28.0"E
F4	K_30	398.2	RR		F	R-E	Košatka	Czech Republic	49°44'03.6"N	18°09'28.0"E
G4	K_31	777.8	RR		F	R-E	Košatka	Czech Republic	49°44'03.6"N	18°09'28.0"E
H4	Z_32	2785.3	RR		F	R	Želechovice, okres Olomouc	Czech Republic	49°44'57.4"N	17°08'06.2"E
A5	Z_33	341.8	RR		F	R	Želechovice, okres Olomouc	Czech Republic	49°44'57.4"N	17°08'06.2"E
B5	Z_34	482.7	RR		F	R	Želechovice, okres Olomouc	Czech Republic	49°44'57.4"N	17°08'06.2"E
C5	Z_35	484.7	RR		F	R	Želechovice, okres Olomouc	Czech Republic	49°44'57.4"N	17°08'06.2"E
D5	Z_36	1117.7	RR		F	R	Želechovice, okres Olomouc	Czech Republic	49°44'57.4"N	17°08'06.2"E
E5	Z_37	2307.3	RR		F	R	Želechovice, okres Olomouc	Czech Republic	49°44'57.4"N	17°08'06.2"E
F5	Z_38	1115.4	RR		F	R	Želechovice, okres Olomouc	Czech Republic	49°44'57.4"N	17°08'06.2"E
G5	Z_39	1187.4	RR		F	R	Želechovice, okres Olomouc	Czech Republic	49°44'57.4"N	17°08'06.2"E
H5	Z_40	2468.3	RR		F	R	Želechovice, okres Olomouc	Czech Republic	49°44'57.4"N	17°08'06.2"E
A6	Z_41	2450.6	RR		F	R	Želechovice, okres Olomouc	Czech Republic	49°44'57.4"N	17°08'06.2"E
B6	Z_42	969.6	RR		M	R	Želechovice, okres Olomouc	Czech Republic	49°44'57.4"N	17°08'06.2"E
C6	Z_43	2613.8	RR		M	R	Želechovice, okres Olomouc	Czech Republic	49°44'57.4"N	17°08'06.2"E
D6	Z_44	1707.3	RR		M	R	Želechovice, okres Olomouc	Czech Republic	49°44'57.4"N	17°08'06.2"E
E6	Z_45	438.9	RR		M	R	Želechovice, okres Olomouc	Czech Republic	49°44'57.4"N	17°08'06.2"E
F6	Z_46	1779	RR		M	R	Želechovice, okres Olomouc	Czech Republic	49°44'57.4"N	17°08'06.2"E
G6	Z_47	892	RR		M	R	Želechovice, okres Olomouc	Czech Republic	49°44'57.4"N	17°08'06.2"E
H6	Z_48	2849.8	RR		M	R	Želechovice, okres Olomouc	Czech Republic	49°44'57.4"N	17°08'06.2"E
A7	Z_49	1273	RR		M	R	Želechovice, okres Olomouc	Czech Republic	49°44'57.4"N	17°08'06.2"E
B7	Z_50	1889.9	RR		M	R	Želechovice, okres Olomouc	Czech Republic	49°44'57.4"N	17°08'06.2"E
C7	Z_51	1807.9	RR		M	R	Želechovice, okres Olomouc	Czech Republic	49°44'57.4"N	17°08'06.2"E
D7	C_52	195.1	RR		F	R	Cítov, okres Mělník	Czech Republic	50°21'25.1"N	14°24'08.2"E
E7	C_53	284.5	RR		F	R	Cítov, okres Mělník	Czech Republic	50°21'25.1"N	14°24'08.2"E
F7	C_54	257.1	RR		F	R	Cítov, okres Mělník	Czech Republic	50°21'25.1"N	14°24'08.2"E
G7	C_55	291.9	RR		F	R	Cítov, okres Mělník	Czech Republic	50°21'25.1"N	14°24'08.2"E
H7	C_56	317.6	RR		F	R	Cítov, okres Mělník	Czech Republic	50°21'25.1"N	14°24'08.2"E
A8	C_57	201.4	RR		F	R	Cítov, okres Mělník	Czech Republic	50°21'25.1"N	14°24'08.2"E
B8	C_58	341.6	RR		F	R	Cítov, okres Mělník	Czech Republic	50°21'25.1"N	14°24'08.2"E
C8	C_59	217.6	RR		F	R	Cítov, okres Mělník	Czech Republic	50°21'25.1"N	14°24'08.2"E
D8	C_60	348.8	RR		F	R	Cítov, okres Mělník	Czech Republic	50°21'25.1"N	14°24'08.2"E
E8	C_61	255.1	RR		F	R	Cítov, okres Mělník	Czech Republic	50°21'25.1"N	14°24'08.2"E
F8	C_62	261.4	RR		F	R	Cítov, okres Mělník	Czech Republic	50°21'25.1"N	14°24'08.2"E
G8	C_63	199.6	RR		F	R	Cítov, okres Mělník	Czech Republic	50°21'25.1"N	14°24'08.2"E
H8	C_64	354.3	RR		F	R	Cítov, okres Mělník	Czech Republic	50°21'25.1"N	14°24'08.2"E
A9	C_65	1803.9	RR		F	R	Cítov, okres Mělník	Czech Republic	50°21'25.1"N	14°24'08.2"E
B9	C_66	244.1	RR		M	R	Cítov, okres Mělník	Czech Republic	50°21'25.1"N	14°24'08.2"E
C9	C_67	353.4	RR		M	R	Cítov, okres Mělník	Czech Republic	50°21'25.1"N	14°24'08.2"E
D9	C_68	506.2	RR		M	R	Cítov, okres Mělník	Czech Republic	50°21'25.1"N	14°24'08.2"E
E9	C_69	194.8	RR		M	R	Cítov, okres Mělník	Czech Republic	50°21'25.1"N	14°24'08.2"E
F9	C_70	196.8	RR		M	R	Cítov, okres Mělník	Czech Republic	50°21'25.1"N	14°24'08.2"E
G9	C_71	482.9	RR		M	R	Cítov, okres Mělník	Czech Republic	50°21'25.1"N	14°24'08.2"E
H9	C_72	204.7	RR		M	R	Cítov, okres Mělník	Czech Republic	50°21'25.1"N	14°24'08.2"E
A10	C_73	194.7	RR		M	R	Cítov, okres Mělník	Czech Republic	50°21'25.1"N	14°24'08.2"E
B10	C_74	283.9	RR		M	R	Cítov, okres Mělník	Czech Republic	50°21'25.1"N	14°24'08.2"E
C10	D_75	106	LR	?	M	R-E	Dolní Benešov	Czech Republic	49°55'05.0"N	18°05'50.7"E
D10	D_76	171.3	LR	2n	M	R-E	Dolní Benešov	Czech Republic	49°55'05.0"N	18°05'50.7"E
E10	D_77	363.1	LR	2n	M	R-E	Dolní Benešov	Czech Republic	49°55'05.0"N	18°05'50.7"E
F10	D_78	559	LR	2n	M	R-E	Dolní Benešov	Czech Republic	49°55'05.0"N	18°05'50.7"E
G10	D_79	370.9	LR	2n	M	R-E	Dolní Benešov	Czech Republic	49°55'05.0"N	18°05'50.7"E
H10	D_80	277.5	LR	2n	M	R-E	Dolní Benešov	Czech Republic	49°55'05.0"N	18°05'50.7"E
A11	D_81	299.4	LR	2n	M	R-E	Dolní Benešov	Czech Republic	49°55'05.0"N	18°05'50.7"E
B11	D_82	207.9	LR	2n	M	R-E	Dolní Benešov	Czech Republic	49°55'05.0"N	18°05'50.7"E
C11	D_83	203.8	ESC	?	M	R-E	Dolní Benešov	Czech Republic	49°55'05.0"N	18°05'50.7"E
D11	D_84	234.8	LR	?	M	R-E	Dolní Benešov	Czech Republic	49°55'05.0"N	18°05'50.7"E
E11	D_85	221.6	LR	2n	M	R-E	Dolní Benešov	Czech Republic	49°55'05.0"N	18°05'50.7"E
F11	D_86	178.3	LR	2n	M	R-E	Dolní Benešov	Czech Republic	49°55'05.0"N	18°05'50.7"E
G11	D_87	276.5	LR	2n	M	R-E	Dolní Benešov	Czech Republic	49°55'05.0"N	18°05'50.7"E
H11	D_88	249.5	RR		M	R-E	Dolní Benešov	Czech Republic	49°55'05.0"N	18°05'50.7"E
A12	D_89	266.4	RR		F	R-E	Dolní Benešov	Czech Republic	49°55'05.0"N	18°05'50.7"E
B12	D_90	114.5	RR		F	R-E	Dolní Benešov	Czech Republic	49°55'05.0"N	18°05'50.7"E
C12	D_91	131	RR		F	R-E	Dolní Benešov	Czech Republic	49°55'05.0"N	18°05'50.7"E
D12	D_92	219	RR		F	R-E	Dolní Benešov	Czech Republic	49°55'05.0"N	18°05'50.7"E
E12	D_93	63.9	RR		F	R-E	Dolní Benešov	Czech Republic	49°55'05.0"N	18°05'50.7"E
F12	D_94	148.3	RR		F	R-E	Dolní Benešov	Czech Republic	49°55'05.0"N	18°05'50.7"E
G12	D_95	141.4	RR		F	R-E	Dolní Benešov	Czech Republic	49°55'05.0"N	18°05'50.7"E
H12	D_96	278.2	RR		F	R-E	Dolní Benešov	Czech Republic	49°55'05.0"N	18°05'50.7"E

## Sheet: Plate_2
									Coordinates
Pos.	Sample ID	DNA_Concentration (ng/µl)	Genotype	Ploidy	Sex	System	Locality	Country	North	East
A1	D_97	298.1	RR		F	R-E	Dolní Benešov	Czech Republic	49°55'05.0"N	18°05'50.7"E
B1	D_98	806.5	RR		F	R-E	Dolní Benešov	Czech Republic	49°55'05.0"N	18°05'50.7"E
C1	D_99	214.4	RR		F	R-E	Dolní Benešov	Czech Republic	49°55'05.0"N	18°05'50.7"E
D1	D_100	213.1	RR		F	R-E	Dolní Benešov	Czech Republic	49°55'05.0"N	18°05'50.7"E
E1	D_101	262.3	RR		F	R-E	Dolní Benešov	Czech Republic	49°55'05.0"N	18°05'50.7"E
F1	P_102	599.6	RR		F	R-E	Karsibor	Poland	53°51'07.7"N	14°20'05.6"E
G1	P_103	158.8	RR		F	R-E	Karsibor	Poland	53°51'07.7"N	14°20'05.6"E
H1	P_104	152.1	RR		F	R-E	Karsibor	Poland	53°51'07.7"N	14°20'05.6"E
A2	P_105	173.9	RR		F	R-E	Karsibor	Poland	53°51'07.7"N	14°20'05.6"E
B2	P_106	112.9	RR		F	R-E	Karsibor	Poland	53°51'07.7"N	14°20'05.6"E
C2	P_107	254.6	RR		F	R-E	Karsibor	Poland	53°51'07.7"N	14°20'05.6"E
D2	P_108	246.7	RR		F	R-E	Karsibor	Poland	53°51'07.7"N	14°20'05.6"E
E2	P_109	195.5	RR		F	R-E	Karsibor	Poland	53°51'07.7"N	14°20'05.6"E
F2	P_110	99.8	RR		F	R-E	Karsibor	Poland	53°51'07.7"N	14°20'05.6"E
G2	P_111	168.3	RR		F	R-E	Karsibor	Poland	53°51'07.7"N	14°20'05.6"E
H2	P_112	87.8	RR		?	R-E	Karsibor	Poland	53°51'07.7"N	14°20'05.6"E
A3	P_113	455.5	LR	2n	M	R-E	Karsibor	Poland	53°51'07.7"N	14°20'05.6"E
B3	P_114	398.2	LR	2n	?	R-E	Karsibor	Poland	53°51'07.7"N	14°20'05.6"E
C3	P_115	92	LR	2n	M	R-E	Karsibor	Poland	53°51'07.7"N	14°20'05.6"E
D3	P_116	278.2	LR	2n	M	R-E	Karsibor	Poland	53°51'07.7"N	14°20'05.6"E
E3	P_117	645.7	LR	2n	M	R-E	Karsibor	Poland	53°51'07.7"N	14°20'05.6"E
F3	P_118	220.4	LR	2n	M	R-E	Karsibor	Poland	53°51'07.7"N	14°20'05.6"E
G3	P_119	277.8	LR	2n	M	R-E	Karsibor	Poland	53°51'07.7"N	14°20'05.6"E
H3	P_120	190.5	LR	2n	M	R-E	Karsibor	Poland	53°51'07.7"N	14°20'05.6"E
A4	P_121	233.6	LR	2n	M	R-E	Karsibor	Poland	53°51'07.7"N	14°20'05.6"E
B4	W_122	395.6	LR	2n	F	E	Wysoka Kamieńska	Poland	53°49'53.2"N	14°51'51.8"E
C4	W_123	179.5	LR	2n	?	E	Jarzębowo, Wolin	Poland	53°54'32.6"N	14°38'45.9"E
D4	W_124	215.2	LR	2n	M	E	Jarzębowo, Wolin	Poland	53°54'32.6"N	14°38'45.9"E
E4	W_125	307.4	LR	2n	M	E	Jarzębowo, Wolin	Poland	53°54'32.6"N	14°38'45.9"E
F4	W_126	564.6	LR	2n	M	E	Jarzębowo, Wolin	Poland	53°54'32.6"N	14°38'45.9"E
G4	W_127	148.5	LR	2n	M	E	Jarzębowo, Wolin	Poland	53°54'32.6"N	14°38'45.9"E
H4	W_128	359	RRL	3n	?	E	Wysoka Kamieńska	Poland	53°49'53.2"N	14°51'51.8"E
A5	L_129	116.6	RRL	3n	M	R-E	Lebus	Germany	52°25'02.3"N	14°32'31.1"E
B5	L_130	254.6	LR	2n	M	R-E	Lebus	Germany	52°25'02.3"N	14°32'31.1"E
C5	L_131	515	LR	2n	M	R-E	Lebus	Germany	52°25'02.3"N	14°32'31.1"E
D5	L_132	277	LR	2n	M	R-E	Lebus	Germany	52°25'02.3"N	14°32'31.1"E
E5	L_133	257	LR	2n	M	R-E	Lebus	Germany	52°25'02.3"N	14°32'31.1"E
F5	L_134	241.9	LR	2n	M	R-E	Lebus	Germany	52°25'02.3"N	14°32'31.1"E
G5	L_135	146.4	RR		M	R-E	Lebus	Germany	52°25'02.3"N	14°32'31.1"E
H5	L_136	742.4	RR		M	R-E	Lebus	Germany	52°25'02.3"N	14°32'31.1"E
A6	L_137	196.7	RR		M	R-E	Lebus	Germany	52°25'02.3"N	14°32'31.1"E
B6	L_138	398.5	RR		M	R-E	Lebus	Germany	52°25'02.3"N	14°32'31.1"E
C6	L_139	156.3	RR		M	R-E	Lebus	Germany	52°25'02.3"N	14°32'31.1"E
D6	L_140	266.5	RR		M	R-E	Lebus	Germany	52°25'02.3"N	14°32'31.1"E
E6	L_141	319.7	RR		M	R-E	Lebus	Germany	52°25'02.3"N	14°32'31.1"E
F6	L_142	277.7	RR		M	R-E	Lebus	Germany	52°25'02.3"N	14°32'31.1"E
G6	B_143	275.5	LR	2n	F	R-E (?)	Borovec, okres Nový Jičín	Czech Republic	49°37'58.6"N	18°06'09.0"E
H6	B_144	372.7	LR	2n	M	R-E (?)	Borovec, okres Nový Jičín	Czech Republic	49°37'58.6"N	18°06'09.0"E
A7	B_145	1043.9	LR	2n	M	R-E (?)	Borovec, okres Nový Jičín	Czech Republic	49°37'58.6"N	18°06'09.0"E
B7	B_146	1146.3	LR	2n	M	R-E (?)	Borovec, okres Nový Jičín	Czech Republic	49°37'58.6"N	18°06'09.0"E
C7	B_147	248.4	LR	2n	M	R-E (?)	Borovec, okres Nový Jičín	Czech Republic	49°37'58.6"N	18°06'09.0"E
D7	B_148	21.6	RR		M	R-E (?)	Borovec, okres Nový Jičín	Czech Republic	49°37'58.6"N	18°06'09.0"E
E7	B_149	26	RR		M	R-E (?)	Borovec, okres Nový Jičín	Czech Republic	49°37'58.6"N	18°06'09.0"E
F7	B_150	29.7	RR		M	R-E (?)	Borovec, okres Nový Jičín	Czech Republic	49°37'58.6"N	18°06'09.0"E
G7	B_151	26.5	RR		M	R-E (?)	Borovec, okres Nový Jičín	Czech Republic	49°37'58.6"N	18°06'09.0"E
H7	B_152	35.6	RR		M	R-E (?)	Borovec, okres Nový Jičín	Czech Republic	49°37'58.6"N	18°06'09.0"E
A8	B_153	28.1	LR	2n	M	R-E (?)	Borovec, okres Nový Jičín	Czech Republic	49°37'58.6"N	18°06'09.0"E
B8	B_154	27.4	RR		M	R-E (?)	Borovec, okres Nový Jičín	Czech Republic	49°37'58.6"N	18°06'09.0"E
C8	B_155	29.2	?	?	?	R-E (?)	Borovec, okres Nový Jičín	Czech Republic	49°37'58.6"N	18°06'09.0"E
D8	B_156	242.8	LR	2n	F	R-E (?)	Borovec, okres Nový Jičín	Czech Republic	49°37'58.6"N	18°06'09.0"E
E8	B_157	193	LR	2n	F	R-E (?)	Borovec, okres Nový Jičín	Czech Republic	49°37'58.6"N	18°06'09.0"E
F8	B_158	226.6	LR	2n	F	R-E (?)	Borovec, okres Nový Jičín	Czech Republic	49°37'58.6"N	18°06'09.0"E
G8	B_159	202.9	LLR	3n	M	R-E (?)	Borovec, okres Nový Jičín	Czech Republic	49°37'58.6"N	18°06'09.0"E
H8	B_160	529.3	LLR	3n	M	R-E (?)	Borovec, okres Nový Jičín	Czech Republic	49°37'58.6"N	18°06'09.0"E
A9	B_161	245.5	LR	2n	F	R-E (?)	Borovec, okres Nový Jičín	Czech Republic	49°37'58.6"N	18°06'09.0"E
B9	B_162	203.3	LR	2n	F	R-E (?)	Borovec, okres Nový Jičín	Czech Republic	49°37'58.6"N	18°06'09.0"E
C9	B_163	333.3	LR	2n	F	R-E (?)	Borovec, okres Nový Jičín	Czech Republic	49°37'58.6"N	18°06'09.0"E
D9	B_164	281.1	LR	2n	F	R-E (?)	Borovec, okres Nový Jičín	Czech Republic	49°37'58.6"N	18°06'09.0"E
E9	CH_165	458.3	LR	2n	F	L-E	Bara, Grubišno Polje	Croatia	45°42'30.9"N	17°09'02.3"E
F9	CH_166	292.8	LR	2n	F	L-E	Bara, Grubišno Polje	Croatia	45°42'30.9"N	17°09'02.3"E
G9	CH_167	325.1	LR	2n	F	L-E	Bara, Grubišno Polje	Croatia	45°42'30.9"N	17°09'02.3"E
H9	CH_168	278.5	LR	2n	M	L-E	Bara, Grubišno Polje	Croatia	45°42'30.9"N	17°09'02.3"E
A10	CH_169	357.4	LR	2n	M	L-E	Bara, Grubišno Polje	Croatia	45°42'30.9"N	17°09'02.3"E
B10	CH_170	271.7	LR	2n	M	L-E	Bara, Grubišno Polje	Croatia	45°42'30.9"N	17°09'02.3"E
C10	CH_171	306.3	LL		F	L-E	Bara, Grubišno Polje	Croatia	45°42'30.9"N	17°09'02.3"E
D10	CH_172	277.4	LL		F	L-E	Bara, Grubišno Polje	Croatia	45°42'30.9"N	17°09'02.3"E
E10	H_173	92	RR		M	R	Kapuvár	Hungary	47°40'03.6"N	17°08'01.7"E
F10	H_174	132.5	RR		M	R	Kapuvár	Hungary	47°40'03.6"N	17°08'01.7"E
G10	H_175	374.4	RR		M	R	Kapuvár	Hungary	47°40'03.6"N	17°08'01.7"E
H10	H_176	221.4	RR		M	R	Kapuvár	Hungary	47°40'03.6"N	17°08'01.7"E
A11	H_177	328	RR		M	R	Kapuvár	Hungary	47°40'03.6"N	17°08'01.7"E
B11	H_178	506.4	RR		F	R	Kapuvár	Hungary	47°40'03.6"N	17°08'01.7"E
C11	H_179	466.6	RR		M	R	Kapuvár	Hungary	47°40'03.6"N	17°08'01.7"E
D11	H_180	327.2	RR		M	R	Kapuvár	Hungary	47°40'03.6"N	17°08'01.7"E
E11	H_181	204.3	RR		M	R	Kapuvár	Hungary	47°40'03.6"N	17°08'01.7"E
F11	H_182	221	RR		M	R	Kapuvár	Hungary	47°40'03.6"N	17°08'01.7"E
G11	H_183	276.1	RR		M	R	Kapuvár	Hungary	47°40'03.6"N	17°08'01.7"E
H11	H_184	342.7	RR		M	R	Kapuvár	Hungary	47°40'03.6"N	17°08'01.7"E
A12	H_185	164.9	RR		F	R	Kapuvár	Hungary	47°40'03.6"N	17°08'01.7"E
B12	CT_186	314.5	LL		M	L-E	Český Těšín	Czech Republic	49°44'39.3"N	18°36'29.0"E
C12	CT_187	385.8	LL		M	L-E	Český Těšín	Czech Republic	49°44'39.3"N	18°36'29.0"E
D12	CT_188	280.3	LL		M	L-E	Český Těšín	Czech Republic	49°44'39.3"N	18°36'29.0"E
E12	CT_189	251.2	LL		M	L-E	Český Těšín	Czech Republic	49°44'39.3"N	18°36'29.0"E
F12	CT_190	297.9	LL		M	L-E	Český Těšín	Czech Republic	49°44'39.3"N	18°36'29.0"E
G12	CT_191	318.6	LL		M	L-E	Český Těšín	Czech Republic	49°44'39.3"N	18°36'29.0"E
H12	CT_192	184.9	LL		M	L-E	Český Těšín	Czech Republic	49°44'39.3"N	18°36'29.0"E

## Sheet: Plate_3
									Coordinates
Pos.	Sample ID	DNA_Concentration (ng/µl)	Genotype	Ploidy	Sex	System	Locality	Country	North	East
A1	CT_193	548.7	LR	2n	F	L-E	Český Těšín	Czech Republic	49°44'39.3"N	18°36'29.0"E
B1	CT_194	246.7	LL		F	L-E	Český Těšín	Czech Republic	49°44'39.3"N	18°36'29.0"E
C1	CT_195	162.4	LL		F	L-E	Český Těšín	Czech Republic	49°44'39.3"N	18°36'29.0"E
D1	CT_196	239.6	LR	2n	F	L-E	Český Těšín	Czech Republic	49°44'39.3"N	18°36'29.0"E
E1	CT_197	256.8	LR	2n	F	L-E	Český Těšín	Czech Republic	49°44'39.3"N	18°36'29.0"E
F1	CT_198	185	LR	2n	F	L-E	Český Těšín	Czech Republic	49°44'39.3"N	18°36'29.0"E
G1	CT_199	482.3	LR	2n	F	L-E	Český Těšín	Czech Republic	49°44'39.3"N	18°36'29.0"E
H1	T_200	369.9	LR	2n	F	L-E	Trnávka	Czech Republic	49°40'55.7"N	18°11'00.9"E
A2	T_201	445.3	LR	2n	F	L-E	Trnávka	Czech Republic	49°40'55.7"N	18°11'00.9"E
B2	T_202	457.3	LL		F	L-E	Trnávka	Czech Republic	49°40'55.7"N	18°11'00.9"E
C2	T_203	731.5	LL		F	L-E	Trnávka	Czech Republic	49°40'55.7"N	18°11'00.9"E
D2	T_204	628.3	LL		F	L-E	Trnávka	Czech Republic	49°40'55.7"N	18°11'00.9"E
E2	T_205	1374.1	LR	2n	F	L-E	Trnávka	Czech Republic	49°40'55.7"N	18°11'00.9"E
F2	T_206	883.5	LR	2n	F	L-E	Trnávka	Czech Republic	49°40'55.7"N	18°11'00.9"E
G2	T_207	738.5	LL		M	L-E	Trnávka	Czech Republic	49°40'55.7"N	18°11'00.9"E
H2	T_208	821.9	LL		F	L-E	Trnávka	Czech Republic	49°40'55.7"N	18°11'00.9"E
A3	T_209	907.4	LL		M	L-E	Trnávka	Czech Republic	49°40'55.7"N	18°11'00.9"E
B3	T_210	1022.8	LL		F	L-E	Trnávka	Czech Republic	49°40'55.7"N	18°11'00.9"E
C3	T_211	1036.3	LL		M	L-E	Trnávka	Czech Republic	49°40'55.7"N	18°11'00.9"E
D3	T_212	783.8	LL		M	L-E	Trnávka	Czech Republic	49°40'55.7"N	18°11'00.9"E
E3	T_213	1448.1	LL		M	L-E	Trnávka	Czech Republic	49°40'55.7"N	18°11'00.9"E
F3	T_214	722.4	LL		M	L-E	Trnávka	Czech Republic	49°40'55.7"N	18°11'00.9"E
G3	BU_215	115	RR		M	R	Eleshnitsa	Bulgaria	41°51'41.0"N	23°37'49.6"E
H3	BU_216	614.8	RR		M	R	Eleshnitsa	Bulgaria	41°51'41.0"N	23°37'49.6"E
A4	BU_217	805.7	RR		M	R	Eleshnitsa	Bulgaria	41°51'41.0"N	23°37'49.6"E
B4	BU_218	660.2	RR		M	R	Brodilovo	Bulgaria	42°05'22.6"N	27°51'19.2"E
C4	BU_219	2587.2	RR		M	R	Brodilovo	Bulgaria	42°05'22.6"N	27°51'19.2"E
D4	BU_220	699.1	RR		M	R	Brodilovo	Bulgaria	42°05'22.6"N	27°51'19.2"E
E4	BU_221	688	RR		M	R	Brodilovo	Bulgaria	42°05'22.6"N	27°51'19.2"E
F4	BU_222	1060.7	RR		F	R	Brodilovo	Bulgaria	42°05'22.6"N	27°51'19.2"E
G4	R_223	358.3	RR		M	R	Oltenița	Romania	44°04'38.7"N	26°37'24.1"E
H4	R_224	578.2	RR		F	R	Oltenița	Romania	44°04'38.7"N	26°37'24.1"E
A5	R_225	500.1	RR		M	R	Oltenița	Romania	44°04'38.7"N	26°37'24.1"E
B5	R_226	326.4	RR		M	R	Oltenița	Romania	44°04'38.7"N	26°37'24.1"E
C5	R_227	435.9	RR		?	R	Oltenița	Romania	44°04'38.7"N	26°37'24.1"E
D5	R_228	1689.5	RR		?	R	Oltenița	Romania	44°04'38.7"N	26°37'24.1"E
E5	R_229	175.4	RR		?	R	Oltenița	Romania	44°04'38.7"N	26°37'24.1"E
F5	R_230	452.3	RR		?	R	Oltenița	Romania	44°04'38.7"N	26°37'24.1"E
G5	R_231	337.1	RR		M	R	Oltenița	Romania	44°04'38.7"N	26°37'24.1"E
H5	PL285/2017	11.8	RR		F	R-E	Lebus	Germany	52°25'02.3"N	14°32'31.1"E
A6	PL286/2017	86.3	RR		M	R-E	Lebus	Germany	52°25'02.3"N	14°32'31.1"E
B6	PL287/2017	9.4	RR		M	R-E	Lebus	Germany	52°25'02.3"N	14°32'31.1"E
C6	PL288/2017	21.1	LR	2n	M	R-E	Lebus	Germany	52°25'02.3"N	14°32'31.1"E
D6	PL289/2017	8.8	RR		M	R-E	Lebus	Germany	52°25'02.3"N	14°32'31.1"E
E6	PL290/2017	19.1	LR	2n	M	R-E	Lebus	Germany	52°25'02.3"N	14°32'31.1"E
F6	PL291/2017	22.6	RR		M	R-E	Lebus	Germany	52°25'02.3"N	14°32'31.1"E
G6	PL292/2017	16.4	RR		M	R-E	Lebus	Germany	52°25'02.3"N	14°32'31.1"E
H6	PL293/2017	24.7	RR		M	R-E	Lebus	Germany	52°25'02.3"N	14°32'31.1"E
A7	PL294/2017	32.9	LR	2n	M	R-E	Lebus	Germany	52°25'02.3"N	14°32'31.1"E
B7	PL295/2017	14	RR		M	R-E	Lebus	Germany	52°25'02.3"N	14°32'31.1"E
C7	PL296/2017	14.1	ESC	?	M	R-E	Lebus	Germany	52°25'02.3"N	14°32'31.1"E
D7	PL297/2017	18.6	RR		M	R-E	Lebus	Germany	52°25'02.3"N	14°32'31.1"E
E7	PL298/2017	14.2	RR		M	R-E	Lebus	Germany	52°25'02.3"N	14°32'31.1"E
F7	PL299/2017	6.9	RR		M	R-E	Lebus	Germany	52°25'02.3"N	14°32'31.1"E
G7	PL300/2017	7.4	ESC	?	M	R-E	Lebus	Germany	52°25'02.3"N	14°32'31.1"E
H7	PL301/2017	6.3	RR		M	R-E	Lebus	Germany	52°25'02.3"N	14°32'31.1"E
A8	PL302/2017	10.8	RR		M	R-E	Lebus	Germany	52°25'02.3"N	14°32'31.1"E
B8	PL303/2017	7.2	RR		M	R-E	Lebus	Germany	52°25'02.3"N	14°32'31.1"E
C8	PL304/2017	40.7	RR		M	R-E	Lebus	Germany	52°25'02.3"N	14°32'31.1"E
D8	PL305/2017	5.8	RR		M	R-E	Lebus	Germany	52°25'02.3"N	14°32'31.1"E
E8	PL306/2017	0.4	RR		M	R-E	Lebus	Germany	52°25'02.3"N	14°32'31.1"E
F8	PL307/2017	0.4	RR		M	R-E	Lebus	Germany	52°25'02.3"N	14°32'31.1"E
G8	PL308/2017	5.5	RR		M	R-E	Lebus	Germany	52°25'02.3"N	14°32'31.1"E
H8	PL309/2017	31.8	RR		M	R-E	Lebus	Germany	52°25'02.3"N	14°32'31.1"E
A9	PL310/2017	11.5	RR		M	R-E	Lebus	Germany	52°25'02.3"N	14°32'31.1"E
B9	PL311/2017	5.9	RR		M	R-E	Lebus	Germany	52°25'02.3"N	14°32'31.1"E
C9	PL312/2017	7.9	RR		M	R-E	Lebus	Germany	52°25'02.3"N	14°32'31.1"E
D9	PL313/2017	6.4	RR		M	R-E	Lebus	Germany	52°25'02.3"N	14°32'31.1"E
E9	PL314/2017	9.2	RR		M	R-E	Lebus	Germany	52°25'02.3"N	14°32'31.1"E
F9	PL315/2017	68.5	RR		M	R-E	Lebus	Germany	52°25'02.3"N	14°32'31.1"E
G9	PL316/2017	9.3	LL		M	L-E	Teschendorf	Germany	52°50'37.2"N	13°08'52.5"E
H9	PL317/2017	6.8	LL		M	L-E	Teschendorf	Germany	52°50'37.2"N	13°08'52.5"E
A10	PL318/2017	3.7	ESC	?	M	L-E	Teschendorf	Germany	52°50'37.2"N	13°08'52.5"E
B10	PL319/2017	6.7	RR		F	?	Friedrichshagen	Germany	52°26'20.7"N	13°37'59.9"E
C10	PL320/2017	73.9	LLR	3n	M	L-E	Teschendorf	Germany	52°50'37.2"N	13°08'52.5"E
D10	PL321/2017	12	RR		F	?	Friedrichshagen	Germany	52°26'20.7"N	13°37'59.9"E
E10	PL322/2017	6.5	RR		M	?	Friedrichshagen	Germany	52°26'20.7"N	13°37'59.9"E
F10	PL323/2017	389.6	LLR	3n	M	L-E	Teschendorf	Germany	52°50'37.2"N	13°08'52.5"E
G10	PL324/2017	39.8	LL		M	L-E	Teschendorf	Germany	52°50'37.2"N	13°08'52.5"E
H10	PL325/2017	4.5	ESC	?	M	L-E	Teschendorf	Germany	52°50'37.2"N	13°08'52.5"E
A11	PL326/2017	2.7	LL		M	L-E	Teschendorf	Germany	52°50'37.2"N	13°08'52.5"E
B11	PL327/2017	6.8	RR		M	?	Friedrichshagen	Germany	52°26'20.7"N	13°37'59.9"E
C11	PL328/2017	2.8	RR		M	?	Friedrichshagen	Germany	52°26'20.7"N	13°37'59.9"E
D11	PL329/2017	2.6	LL		F	L-E	Teschendorf	Germany	52°50'37.2"N	13°08'52.5"E
E11	PL330/2017	8.1	LR	?	M	L-E	Teschendorf	Germany	52°50'37.2"N	13°08'52.5"E
F11	PL331/2017	6.1	RR		F	?	Friedrichshagen	Germany	52°26'20.7"N	13°37'59.9"E
G11	PL332/2017	2.7	LL		M	L-E	Teschendorf	Germany	52°50'37.2"N	13°08'52.5"E
H11	PL333/2017	7.1	ESC	?	M	L-E	Teschendorf	Germany	52°50'37.2"N	13°08'52.5"E
A12	PL334/2017	2.8	LL		F	L-E	Teschendorf	Germany	52°50'37.2"N	13°08'52.5"E
B12	PL335/2017	112.5	RR		M	?	Friedrichshagen	Germany	52°26'20.7"N	13°37'59.9"E
C12	PL336/2017	3.9	ESC	?	F	L-E	Teschendorf	Germany	52°50'37.2"N	13°08'52.5"E
D12	PL337/2017	11.2	LL		M	L-E	Teschendorf	Germany	52°50'37.2"N	13°08'52.5"E
E12	PL338/2017	7.6	LLR	?	M	L-E	Teschendorf	Germany	52°50'37.2"N	13°08'52.5"E
F12	PL339/2017	59.1	RR		M	?	Friedrichshagen	Germany	52°26'20.7"N	13°37'59.9"E
G12	PL340/2017	6	ESC	?	M	L-E	Teschendorf	Germany	52°50'37.2"N	13°08'52.5"E
H12	PL341/2017	13.4	RR		M	?	Friedrichshagen	Germany	52°26'20.7"N	13°37'59.9"E

## Sheet: Plate_4
									Coordinates
Pos.	Sample ID	DNA_Concentration (ng/µl)	Genotype	Ploidy	Sex	System	Locality	Country	North	East
A1	PL342/2017	7.1	ESC	?	M	L-E	Teschendorf	Germany	52°50'37.2"N	13°08'52.5"E
B1	PL343/2017	107.2	LR		M	L-E	Teschendorf	Germany	52°50'37.2"N	13°08'52.5"E
C1	PL15/2012	217	RR		F	R-E	Albrechtičky	Czech Republic	49°42'21.7"N	18°05'36.8"E
D1	PL16/2012	322.5	RR		F	R-E	Albrechtičky	Czech Republic	49°42'21.7"N	18°05'36.8"E
E1	PL17-2012	289.6	RR		F	R-E	Albrechtičky	Czech Republic	49°42'21.7"N	18°05'36.8"E
F1	PL34-2012	239.3	RR		M	R-E	Albrechtičky	Czech Republic	49°42'21.7"N	18°05'36.8"E
G1	PL35-2012	386.7	RR		M	R-E	Albrechtičky	Czech Republic	49°42'21.7"N	18°05'36.8"E
H1	PL36-2012	227.5	RR		M	R-E	Albrechtičky	Czech Republic	49°42'21.7"N	18°05'36.8"E
A2	PL37-2012	457.1	RR		M	R-E	Albrechtičky	Czech Republic	49°42'21.7"N	18°05'36.8"E
B2	PL38-2012	373.1	RR		M	R-E	Albrechtičky	Czech Republic	49°42'21.7"N	18°05'36.8"E
C2	PL39-2012	201.2	RR		M	R-E	Albrechtičky	Czech Republic	49°42'21.7"N	18°05'36.8"E
D2	PL44-2012	138.3	RR		M	R-E	Albrechtičky	Czech Republic	49°42'21.7"N	18°05'36.8"E
E2	PL45-2012	351.7	RR		M	R-E	Albrechtičky	Czech Republic	49°42'21.7"N	18°05'36.8"E
F2	PL46-2012	279.8	RR		M	R-E	Albrechtičky	Czech Republic	49°42'21.7"N	18°05'36.8"E
G2	PL47-2012	436.7	RR		M	R-E	Albrechtičky	Czech Republic	49°42'21.7"N	18°05'36.8"E
H2	PL112-2013	305	RR		M	R-E	Albrechtičky	Czech Republic	49°42'21.7"N	18°05'36.8"E
A3	PL122-2013	322.4	RR		M	R-E	Albrechtičky	Czech Republic	49°42'21.7"N	18°05'36.8"E
B3	PL129-2013	11.8	LR		M	R-E	Albrechtičky	Czech Republic	49°42'21.7"N	18°05'36.8"E
C3	PL48-2012	6.9	RR		F	R-E	Lebus	Germany	52°25'02.3"N	14°32'31.1"E
D3	PL79-2012	361.2	RR		M	R-E	Lebus	Germany	52°25'02.3"N	14°32'31.1"E
E3	PL80-2012	228.9	RR		M	R-E	Lebus	Germany	52°25'02.3"N	14°32'31.1"E
F3	PL81-2012	184.4	RR		M	R-E	Lebus	Germany	52°25'02.3"N	14°32'31.1"E
G3	PL82-2012	223.6	RR		M	R-E	Lebus	Germany	52°25'02.3"N	14°32'31.1"E
H3	PL83-2012	144.6	RR		M	R-E	Lebus	Germany	52°25'02.3"N	14°32'31.1"E
A4	PL84-2012	200.8	RR		M	R-E	Lebus	Germany	52°25'02.3"N	14°32'31.1"E
B4	PL85-2012	183.5	RR		M	R-E	Lebus	Germany	52°25'02.3"N	14°32'31.1"E
C4	PL86-2012	58.6	RR		M	R-E	Lebus	Germany	52°25'02.3"N	14°32'31.1"E
D4	PL87-2013	53.3	RR		M	R-E	Lebus	Germany	52°25'02.3"N	14°32'31.1"E
E4	PL88-2013	48.9	RR		M	R-E	Lebus	Germany	52°25'02.3"N	14°32'31.1"E
F4	PL89-2013	106.9	RR		M	R-E	Lebus	Germany	52°25'02.3"N	14°32'31.1"E
G4	PL90-2013	32.9	RR		M	R-E	Lebus	Germany	52°25'02.3"N	14°32'31.1"E
H4	PL91-2013	51.3	RR		M	R-E	Lebus	Germany	52°25'02.3"N	14°32'31.1"E
A5	PL92-2013	78.7	RR		M	R-E	Lebus	Germany	52°25'02.3"N	14°32'31.1"E
B5	PL93-2013	64.7	RR		M	R-E	Lebus	Germany	52°25'02.3"N	14°32'31.1"E
C5	PL94-2013	30.5	RR		M	R-E	Lebus	Germany	52°25'02.3"N	14°32'31.1"E
D5	PL95-2013	55.7	LR	?	M	R-E	Lebus	Germany	52°25'02.3"N	14°32'31.1"E
E5	PL96-2013	44.5	LR	?	M	R-E	Lebus	Germany	52°25'02.3"N	14°32'31.1"E
F5	PL01-2012	116.3	RR		F	R	Citov	Czech Republic	50°21'25.1"N	14°24'08.2"E
G5	PL02-2012	255.7	RR		F	R	Citov	Czech Republic	50°21'25.1"N	14°24'08.2"E
H5	PL03-2012	440.1	RR		F	R	Citov	Czech Republic	50°21'25.1"N	14°24'08.2"E
A6	PL04-2012	333.4	RR		F	R	Citov	Czech Republic	50°21'25.1"N	14°24'08.2"E
B6	PL05-2012	491.8	RR		F	R	Citov	Czech Republic	50°21'25.1"N	14°24'08.2"E
C6	PL06-2012	447.8	RR		F	R	Citov	Czech Republic	50°21'25.1"N	14°24'08.2"E
D6	PL07-2012	455.2	RR		F	R	Citov	Czech Republic	50°21'25.1"N	14°24'08.2"E
E6	PL08-2012	351.8	RR		F	R	Citov	Czech Republic	50°21'25.1"N	14°24'08.2"E
F6	PL09-2012	351.2	RR		F	R	Citov	Czech Republic	50°21'25.1"N	14°24'08.2"E
G6	PL101-2013	6.3	RR		M	R	Citov	Czech Republic	50°21'25.1"N	14°24'08.2"E
H6	PL102-2013	4.8	RR		M	R	Citov	Czech Republic	50°21'25.1"N	14°24'08.2"E
A7	PL103-2013	19	RR		M	R	Citov	Czech Republic	50°21'25.1"N	14°24'08.2"E
D7	PL120-2013	313.6	RR		M	R	Citov	Czech Republic	50°21'25.1"N	14°24'08.2"E
F7	PL18-2012	339.6	RR		M	R	Citov	Czech Republic	50°21'25.1"N	14°24'08.2"E
G7	PL19-2012	369	RR		M	R	Citov	Czech Republic	50°21'25.1"N	14°24'08.2"E
H7	PL20-2012	251.8	RR		M	R	Citov	Czech Republic	50°21'25.1"N	14°24'08.2"E
A8	PL21-2012	77.4	RR		M	R	Citov	Czech Republic	50°21'25.1"N	14°24'08.2"E
B8	PL22-2012	455.2	RR		M	R	Citov	Czech Republic	50°21'25.1"N	14°24'08.2"E
C8	PL23-2012	405.6	RR		M	R	Citov	Czech Republic	50°21'25.1"N	14°24'08.2"E
D8	PL24-2012	346.6	RR		M	R	Citov	Czech Republic	50°21'25.1"N	14°24'08.2"E
E8	PL25-2012	107.6	RR		M	R	Citov	Czech Republic	50°21'25.1"N	14°24'08.2"E
F8	PL26-2012	278.8	RR		M	R	Citov	Czech Republic	50°21'25.1"N	14°24'08.2"E
G8	PL27-2012	417.3	RR		M	R	Citov	Czech Republic	50°21'25.1"N	14°24'08.2"E
H8	PL28-2012	501.2	RR		M	R	Citov	Czech Republic	50°21'25.1"N	14°24'08.2"E
A9	PL29-2012	434.7	RR		M	R	Citov	Czech Republic	50°21'25.1"N	14°24'08.2"E
B9	PL30-2012	201.4	RR		M	R	Citov	Czech Republic	50°21'25.1"N	14°24'08.2"E
C9	PL31-2012	207.1	RR		M	R	Citov	Czech Republic	50°21'25.1"N	14°24'08.2"E
D9	PL32-2012	460.6	RR		M	R	Citov	Czech Republic	50°21'25.1"N	14°24'08.2"E
E9	PL33-2012	318	RR		M	R	Citov	Czech Republic	50°21'25.1"N	14°24'08.2"E
F9	PL97-2013	11.7	RR		F	R	Citov	Czech Republic	50°21'25.1"N	14°24'08.2"E
A10	PL132-2013	6.9	LR	?	M	R-E	Košatka	Czech Republic	49°44'03.6"N	18°09'28.0"E
E10	PL137-2013	10.9	LR	?	M	R-E	Košatka	Czech Republic	49°44'03.6"N	18°09'28.0"E
F10	PL138-2013	10.8	LR	?	M	R-E	Košatka	Czech Republic	49°44'03.6"N	18°09'28.0"E
C11	PL98-2013	246.1	RR		F	R-E	Košatka	Czech Republic	49°44'03.6"N	18°09'28.0"E
H11	PL115-2013	152.2	RR		F	R-E	Košatka	Czech Republic	49°44'03.6"N	18°09'28.0"E
A12	PL116-2013	254.2	RR		F	R-E	Košatka	Czech Republic	49°44'03.6"N	18°09'28.0"E
B12	PL117-2013	58.2	RR		F	R-E	Košatka	Czech Republic	49°44'03.6"N	18°09'28.0"E
D12	PL119-2013	223	RR		F	R-E	Košatka	Czech Republic	49°44'03.6"N	18°09'28.0"E
E12	PL143-2013	375.5	RR		F	R-E	Košatka	Czech Republic	49°44'03.6"N	18°09'28.0"E

## Sheet: Plate_5
									Coordinates
Pos.	Sample ID	DNA_Concentration (ng/µl)	Genotype	Ploidy	Sex	System	Population	Country	North	East
A1	PL121-2013	152.2	RR		M	R-E	Košatka	Czech Republic	49°44'03.6"N	18°09'28.0"E
B1	PL55-2012	9.4	LL		F	L-E	Melzower Forst	Germany	53°10'52.2"N	13°56'15.2"E
C1	PL56-2012	8.3	LL		F	L-E	Melzower Forst	Germany	53°10'52.2"N	13°56'15.2"E
D1	PL57-2012	8.4	LL		F	L-E	Melzower Forst	Germany	53°10'52.2"N	13°56'15.2"E
E1	PL58-2012	9.1	LL		F	L-E	Melzower Forst	Germany	53°10'52.2"N	13°56'15.2"E
F1	PL59-2012	73.2	LL		F	L-E	Melzower Forst	Germany	53°10'52.2"N	13°56'15.2"E
G1	PL61-2012	31	LL		F	L-E	Melzower Forst	Germany	53°10'52.2"N	13°56'15.2"E
H1	PL62-2012	215	LL		F	L-E	Melzower Forst	Germany	53°10'52.2"N	13°56'15.2"E
A2	PL63-2012	16.8	LL		F	L-E	Melzower Forst	Germany	53°10'52.2"N	13°56'15.2"E
B2	PL65-2012	277.7	LL		F	L-E	Melzower Forst	Germany	53°10'52.2"N	13°56'15.2"E
C2	PL67-2012	104.4	LL		F	L-E	Melzower Forst	Germany	53°10'52.2"N	13°56'15.2"E
D2	PL78-2012	824	LL		F	L-E	Melzower Forst	Germany	53°10'52.2"N	13°56'15.2"E
E2	PL68-2012	10.8	LL		M	L-E	Melzower Forst	Germany	53°10'52.2"N	13°56'15.2"E
F2	PL69-2012	78.2	LL		M	L-E	Melzower Forst	Germany	53°10'52.2"N	13°56'15.2"E
G2	PL70-2012	66.9	LL		M	L-E	Melzower Forst	Germany	53°10'52.2"N	13°56'15.2"E
H2	PL71-2012	32.8	LL		M	L-E	Melzower Forst	Germany	53°10'52.2"N	13°56'15.2"E
A3	PL72-2012	26.6	LL		M	L-E	Melzower Forst	Germany	53°10'52.2"N	13°56'15.2"E
B3	PL73-2012	18.7	LL		M	L-E	Melzower Forst	Germany	53°10'52.2"N	13°56'15.2"E
C3	PL74-2012	29.8	LL		M	L-E	Melzower Forst	Germany	53°10'52.2"N	13°56'15.2"E
D3	PL75-2012	62.1	LL		M	L-E	Melzower Forst	Germany	53°10'52.2"N	13°56'15.2"E
E3	PL76-2012	29.9	LL		M	L-E	Melzower Forst	Germany	53°10'52.2"N	13°56'15.2"E
F3	PL77-2012	25.5	LL		M	L-E	Melzower Forst	Germany	53°10'52.2"N	13°56'15.2"E
G3	PL64-2012	22	LLR	?	F	L-E	Melzower Forst	Germany	53°10'52.2"N	13°56'15.2"E
H3	PL60-2012	31.1	LL		F	L-E	Melzower Forst	Germany	53°10'52.2"N	13°56'15.2"E
A4	PL164	138.6	RR		M	R	Šúr, Svätý Jur	Slovakia	48°13'44.1"N	17°12'15.4"E
B4	PL166	95.2	RR		M	R	Šúr, Svätý Jur	Slovakia	48°13'44.1"N	17°12'15.4"E
C4	PL167	67.7	RR		M	R	Šúr, Svätý Jur	Slovakia	48°13'44.1"N	17°12'15.4"E
D4	PL168	85.7	RR		M	R	Šúr, Svätý Jur	Slovakia	48°13'44.1"N	17°12'15.4"E
E4	PL169	108.2	RR		M	R	Šúr, Svätý Jur	Slovakia	48°13'44.1"N	17°12'15.4"E
F4	PL170	113.4	RR		M	R	Šúr, Svätý Jur	Slovakia	48°13'44.1"N	17°12'15.4"E
G4	PL171	36	RR		M	R	Šúr, Svätý Jur	Slovakia	48°13'44.1"N	17°12'15.4"E
H4	PL165	175.8	RR		?	R	Šúr, Svätý Jur	Slovakia	48°13'44.1"N	17°12'15.4"E
A5	PL2001/2017	52.6	LL		M	L-E	Untermühle	Germany	53°04'51.9"N	12°54'00.3"E
B5	PL2002/2017	51.7	LLR	?	M	L-E	Untermühle	Germany	53°04'51.9"N	12°54'00.3"E
C5	PL2003/2017	60.7	LLR	3n	M	L-E	Melzower Forst	Germany	53°10'52.2"N	13°56'15.2"E
D5	PL2004/2017	31.3	LL		M	L-E	Melzower Forst	Germany	53°10'52.2"N	13°56'15.2"E
E5	PL2005/2017	41.6	LLR	?	M	L-E	Melzower Forst	Germany	53°10'52.2"N	13°56'15.2"E
F5	PL2006/2017	41.9	LL		M	L-E	Melzower Forst	Germany	53°10'52.2"N	13°56'15.2"E
G5	PL2007/2017	30.1	LLR	?	?	L-E	Melzower Forst	Germany	53°10'52.2"N	13°56'15.2"E
H5	PL2008/2017	69.5	LR	2n	M	L-E	Melzower Forst	Germany	53°10'52.2"N	13°56'15.2"E
A6	PL2009/2017	63.1	LLR	?	M	L-E	Melzower Forst	Germany	53°10'52.2"N	13°56'15.2"E
B6	PL2010/2017	54.7	LLR	3n	?	L-E	Melzower Forst	Germany	53°10'52.2"N	13°56'15.2"E
C6	PL2011/2017	61.6	LLR	?	?	L-E	Melzower Forst	Germany	53°10'52.2"N	13°56'15.2"E
D6	PL2012/2017	57.5	LLR	3n		L-E	Melzower Forst	Germany	53°10'52.2"N	13°56'15.2"E
E6	PL2013/2017	38.6	LR	?	?	L-E	Melzower Forst	Germany	53°10'52.2"N	13°56'15.2"E
F6	PL2014/2017	53.2	LLR	3n	M	L-E	Melzower Forst	Germany	53°10'52.2"N	13°56'15.2"E
G6	PL2015/2017	40.8	LLR	?	?	L-E	Melzower Forst	Germany	53°10'52.2"N	13°56'15.2"E
H6	PL2016/2017	63.5	LLR	3n	M	L-E	Melzower Forst	Germany	53°10'52.2"N	13°56'15.2"E
A7	PL2017/2017	86.8	LLR	3n	M	L-E	Melzower Forst	Germany	53°10'52.2"N	13°56'15.2"E
B7	PL2018/2017	30.9	LLR	?	?	L-E	Melzower Forst	Germany	53°10'52.2"N	13°56'15.2"E
C7	PL2019/2017	50.4	LLR	3n	M	L-E	Melzower Forst	Germany	53°10'52.2"N	13°56'15.2"E
D7	PL2020/2017	53.6	LLR	3n	?	L-E	Melzower Forst	Germany	53°10'52.2"N	13°56'15.2"E
E7	PL2021/2017	68	LLR	3n	M	L-E	Melzower Forst	Germany	53°10'52.2"N	13°56'15.2"E
F7	PL2022/2017	35.8	LR	?	?	L-E	Melzower Forst	Germany	53°10'52.2"N	13°56'15.2"E
G7	PL2023/2017	25.6	LR	?	?	L-E	Melzower Forst	Germany	53°10'52.2"N	13°56'15.2"E
H7	PL2024/2017	41.5	RRL	?	?	L-E	Melzower Forst	Germany	53°10'52.2"N	13°56'15.2"E
A8	PL2025/2017	39.4	LLR	?	?	L-E	Melzower Forst	Germany	53°10'52.2"N	13°56'15.2"E
B8	PL2026/2017	48.9	LR	2n	?	L-E	Melzower Forst	Germany	53°10'52.2"N	13°56'15.2"E
C8	PL2027/2017	68.2	LLR	3n	F	L-E	Melzower Forst	Germany	53°10'52.2"N	13°56'15.2"E
D8	PL2028/2017	59.5	RRL	?	F	L-E	Melzower Forst	Germany	53°10'52.2"N	13°56'15.2"E
E8	PL2029/2017	40.9	LLR	?	?	L-E	Melzower Forst	Germany	53°10'52.2"N	13°56'15.2"E
F8	PL2030/2017	48.3	LLR	3n	F	L-E	Melzower Forst	Germany	53°10'52.2"N	13°56'15.2"E
G8	PL2031/2017	33	LL		M	L-E	Melzower Forst	Germany	53°10'52.2"N	13°56'15.2"E
H8	PL2032/2017	30.5	LR	?	?	L-E	Melzower Forst	Germany	53°10'52.2"N	13°56'15.2"E
A9	PL2033/2017	62.7	LLR	3n	F	L-E	Melzower Forst	Germany	53°10'52.2"N	13°56'15.2"E
B9	PL2034/2017	46.7	LLR	?	?	L-E	Melzower Forst	Germany	53°10'52.2"N	13°56'15.2"E
C9	PL2035/2017	45.4	LLR	3n	?	L-E	Melzower Forst	Germany	53°10'52.2"N	13°56'15.2"E
D9	PL2036/2017	53.4	LR	?	?	L-E	Melzower Forst	Germany	53°10'52.2"N	13°56'15.2"E
E9	PL2037/2017	34.7	LLR	?	?	L-E	Melzower Forst	Germany	53°10'52.2"N	13°56'15.2"E
F9	PL2038/2017	65.5	LLR	3n	?	L-E	Melzower Forst	Germany	53°10'52.2"N	13°56'15.2"E
G9	PL2039/2017	52	LLR	?	?	L-E	Melzower Forst	Germany	53°10'52.2"N	13°56'15.2"E
H9	PL2040/2017	40.1	LLR	?	?	L-E	Melzower Forst	Germany	53°10'52.2"N	13°56'15.2"E
A10	PL2041/2017	63.3	LLR	3n	?	L-E	Melzower Forst	Germany	53°10'52.2"N	13°56'15.2"E
B10	PL2042/2017	81.1	LLR	3n	?	L-E	Melzower Forst	Germany	53°10'52.2"N	13°56'15.2"E
C10	PL2043/2017	52.4	LLR	3n	?	L-E	Melzower Forst	Germany	53°10'52.2"N	13°56'15.2"E
D10	PL2044/2017	49.3	LLR	3n	F	L-E	Melzower Forst	Germany	53°10'52.2"N	13°56'15.2"E
E10	PL2045/2017	49.4	LLR	3n	M	L-E	Melzower Forst	Germany	53°10'52.2"N	13°56'15.2"E
F10	PL2046/2017	63.7	LLR	?	M	L-E	Melzower Forst	Germany	53°10'52.2"N	13°56'15.2"E
G10	PL2047/2017	70.9	LR	2n	F	L-E	Melzower Forst	Germany	53°10'52.2"N	13°56'15.2"E
H10	PL2048/2017	73.5	LLR	3n	M	L-E	Melzower Forst	Germany	53°10'52.2"N	13°56'15.2"E
A11	PL2049/2017	70.1	LLR	3n	F	L-E	Melzower Forst	Germany	53°10'52.2"N	13°56'15.2"E
B11	PL2050/2017	59.7	LLR	3n	F	L-E	Melzower Forst	Germany	53°10'52.2"N	13°56'15.2"E
C11	PL2051/2017	75.5	LLR	3n	F	L-E	Melzower Forst	Germany	53°10'52.2"N	13°56'15.2"E
D11	PL2052/2017	80.4	LLR	3n	M	L-E	Melzower Forst	Germany	53°10'52.2"N	13°56'15.2"E
E11	PL2053/2017	62.8	LLR	3n	F	L-E	Melzower Forst	Germany	53°10'52.2"N	13°56'15.2"E
F11	PL2054/2017	48.8	LLR	?	F	L-E	Melzower Forst	Germany	53°10'52.2"N	13°56'15.2"E
G11	PL2055/2017	46.5	LL		F	L-E	Melzower Forst	Germany	53°10'52.2"N	13°56'15.2"E
H11	PL2056/2017	57.5	LL		M	L-E	Melzower Forst	Germany	53°10'52.2"N	13°56'15.2"E
A12	PL2057/2017	66.6	LLR	3n	?	L-E	Melzower Forst	Germany	53°10'52.2"N	13°56'15.2"E
B12	PL2058/2017	55.4	LL		M	L-E	Melzower Forst	Germany	53°10'52.2"N	13°56'15.2"E
C12	PL2059/2017	41.2	LLR	3n	?	L-E	Melzower Forst	Germany	53°10'52.2"N	13°56'15.2"E
D12	PL2060/2017	21.2	LLR	?	?	L-E	Melzower Forst	Germany	53°10'52.2"N	13°56'15.2"E
E12	PL2061/2017	36.2	LLR	?	?	L-E	Melzower Forst	Germany	53°10'52.2"N	13°56'15.2"E
F12	PL2062/2017	36.2	LLR	?	?	L-E	Melzower Forst	Germany	53°10'52.2"N	13°56'15.2"E
G12	PL2063/2017	55.6	LR	2n	?	L-E	Melzower Forst	Germany	53°10'52.2"N	13°56'15.2"E
H12	PL2064/2017	42.4	RRL	?	?	L-E	Melzower Forst	Germany	53°10'52.2"N	13°56'15.2"E

## Sheet: Plate_6
									Coordinates
Pos.	Sample ID	DNA_Concentration (ng/µl)	Genotype	Ploidy	Sex	System	Population	Country	North	East
A1	PL2065/2017	36.2	LLR	3n	?	L-E	Melzower Forst	Germany	53°10'52.2"N	13°56'15.2"E
B1	PL2066/2017	42.7	LR	2n	?	L-E	Melzower Forst	Germany	53°10'52.2"N	13°56'15.2"E
C1	PL2067/2017	43.3	LLR	3n	?	L-E	Melzower Forst	Germany	53°10'52.2"N	13°56'15.2"E
D1	PL2068/2017	44.6	RRL	3n	?	L-E	Melzower Forst	Germany	53°10'52.2"N	13°56'15.2"E
E1	PL2069/2017	53.8	LL		?	L-E	Melzower Forst	Germany	53°10'52.2"N	13°56'15.2"E
F1	PL2070/2017	18.6	ESC	?	?	L-E	Melzower Forst	Germany	53°10'52.2"N	13°56'15.2"E
G1	PL2071/2017	67.3	LLR	3n	?	L-E	Melzower Forst	Germany	53°10'52.2"N	13°56'15.2"E
H1	PL2072/2017	44.6	LLR	?	?	L-E	Melzower Forst	Germany	53°10'52.2"N	13°56'15.2"E
A2	PL344/2017	184.7	LR	2n	M	E	Wysoka Kamieńska	Poland	53°49'53.2"N	14°51'51.8"E
B2	PL345/2017	248.6	LR	2n	M	E	Wysoka Kamieńska	Poland	53°49'53.2"N	14°51'51.8"E
C2	PL346/2017	169.8	LR	2n	M	E	Wysoka Kamieńska	Poland	53°49'53.2"N	14°51'51.8"E
D2	PL347/2017	122.6	RRL	3n	M	E	Wysoka Kamieńska	Poland	53°49'53.2"N	14°51'51.8"E
E2	PL348/2017	179.8	ESC	2n?	M	E	Wysoka Kamieńska	Poland	53°49'53.2"N	14°51'51.8"E
F2	PL349/2017	233.8	LR	2n	M	E	Wysoka Kamieńska	Poland	53°49'53.2"N	14°51'51.8"E
G2	PL350/2017	98.1	LR	2n	M	E	Wysoka Kamieńska	Poland	53°49'53.2"N	14°51'51.8"E
H2	PL351/2017	121.1	RRL	2n*	M	E	Wysoka Kamieńska	Poland	53°49'53.2"N	14°51'51.8"E
A3	PL352/2017	107.3	LR	2n	M	E	Wysoka Kamieńska	Poland	53°49'53.2"N	14°51'51.8"E
B3	PL353/2017	90.9	LLR	3n	M	E	Wysoka Kamieńska	Poland	53°49'53.2"N	14°51'51.8"E
C3	PL354/2017	115.1	RRL	3n	F	E	Wysoka Kamieńska	Poland	53°49'53.2"N	14°51'51.8"E
D3	PL355/2017	165.5	RRL	3n	F	E	Wysoka Kamieńska	Poland	53°49'53.2"N	14°51'51.8"E
E3	PL356/2017	122.7	RRL	3n	F	E	Wysoka Kamieńska	Poland	53°49'53.2"N	14°51'51.8"E
F3	PL357/2017	116.6	LR	2n	F	E	Wysoka Kamieńska	Poland	53°49'53.2"N	14°51'51.8"E
G3	PL358/2017	115.1	LR	2n	F	E	Wysoka Kamieńska	Poland	53°49'53.2"N	14°51'51.8"E
H3	PL359/2017	109.1	LR	2n	F	E	Wysoka Kamieńska	Poland	53°49'53.2"N	14°51'51.8"E
A4	PL360/2017	70.5	LR	2n	F	E	Wysoka Kamieńska	Poland	53°49'53.2"N	14°51'51.8"E
B4	PL361/2017	204	RRL	3n	F	E	Wysoka Kamieńska	Poland	53°49'53.2"N	14°51'51.8"E
C4	PL362/2017	288.4	LLR	3n	F	E	Wysoka Kamieńska	Poland	53°49'53.2"N	14°51'51.8"E
D4	PL363/2017	182.9	LR	2n	F	E	Wysoka Kamieńska	Poland	53°49'53.2"N	14°51'51.8"E
E4	PL364/2017	128.1	RRL	3n	F	E	Usedom	Germany	53°57'12.7"N	14°05'29.1"E
F4	PL365/2017	187.9	RRL	3n	M	E	Usedom	Germany	53°57'12.7"N	14°05'29.1"E
G4	PL366/2017	233.7	LLR	3n	M	E	Usedom	Germany	53°57'12.7"N	14°05'29.1"E
H4	PL367/2017	98.3	LLR	3n	M	E	Usedom	Germany	53°57'12.7"N	14°05'29.1"E
A5	PL368/2017	210.7	LLR	3n	M	E	Usedom	Germany	53°57'12.7"N	14°05'29.1"E
B5	PL369/2017	127.2	LR	2n	M	E	Usedom	Germany	53°57'12.7"N	14°05'29.1"E
C5	PL370/2017	70.6	LLR	?	M	E	Usedom	Germany	53°57'12.7"N	14°05'29.1"E
D5	PL371/2017	133.4	LLR	3n	M	E	Usedom	Germany	53°57'12.7"N	14°05'29.1"E
E5	PL372/2017	150.4	LLR	3n	M	E	Usedom	Germany	53°57'12.7"N	14°05'29.1"E
F5	PL373/2017	106.3	LLR	3n	M	E	Usedom	Germany	53°57'12.7"N	14°05'29.1"E
G5	PL374/2017	94.9	LLR	3n	M	E	Usedom	Germany	53°57'12.7"N	14°05'29.1"E
H5	PL375/2017	146.3	LLR	3n	M	E	Usedom	Germany	53°57'12.7"N	14°05'29.1"E
A6	PL376/2017	151.1	LLR	3n	M	E	Usedom	Germany	53°57'12.7"N	14°05'29.1"E
B6	PL377/2017	165.2	LLR	3n	M	E	Pedersker, Bornholm	Danemark	55°02'07.2"N	14°59'45.0"E
C6	PL378/2017	163.7	RRL	3n	F	E	Pedersker, Bornholm	Danemark	55°02'07.2"N	14°59'45.0"E
D6	PL379/2017	68.8	LR	2n	M	E	Pedersker, Bornholm	Danemark	55°02'07.2"N	14°59'45.0"E
E6	PL380/2017	172.2	RRL	?	F	E	Pedersker, Bornholm	Danemark	55°02'07.2"N	14°59'45.0"E
F6	PL381/2017	134.4	RRL	3n	M	E	Pedersker, Bornholm	Danemark	55°02'07.2"N	14°59'45.0"E
G6	PL382/2017	71.1	RRL	3n	F	E	Pedersker, Bornholm	Danemark	55°02'07.2"N	14°59'45.0"E
H6	PL383/2017	107.9	RRL	?	M	E	Pedersker, Bornholm	Danemark	55°02'07.2"N	14°59'45.0"E
A7	PL384/2017	148.6	RRL	3n	F	E	Pedersker, Bornholm	Danemark	55°02'07.2"N	14°59'45.0"E
B7	PL385/2017	121	RRL	3n	M	E	Pedersker, Bornholm	Danemark	55°02'07.2"N	14°59'45.0"E
C7	PL386/2017	73.1	RRL	3n	F	E	Pedersker, Bornholm	Danemark	55°02'07.2"N	14°59'45.0"E
D7	PL387/2017	200.4	LR	2n	M	E	Pedersker, Bornholm	Danemark	55°02'07.2"N	14°59'45.0"E
E7	PL388/2017	106.5	RRL	3n	F	E	Pedersker, Bornholm	Danemark	55°02'07.2"N	14°59'45.0"E
F7	PL389/2017	132.9	LLR	3n	M	E	Pedersker, Bornholm	Danemark	55°02'07.2"N	14°59'45.0"E
G7	PL390/2017	147	RRL	3n	F	E	Pedersker, Bornholm	Danemark	55°02'07.2"N	14°59'45.0"E
H7	PL391/2017	33.1	RRL	?	M	E	Pedersker, Bornholm	Danemark	55°02'07.2"N	14°59'45.0"E
A8	PL392/2017	89.7	LLR	3n	F	E	Pedersker, Bornholm	Danemark	55°02'07.2"N	14°59'45.0"E
B8	PL393/2017	86.6	RRL	3n	M	E	Pedersker, Bornholm	Danemark	55°02'07.2"N	14°59'45.0"E
C8	PL394/2017	243.9	LLR	3n	M	E	Pedersker, Bornholm	Danemark	55°02'07.2"N	14°59'45.0"E
D8	PL395/2017	203.5	LR	2n	M	E	Pedersker, Bornholm	Danemark	55°02'07.2"N	14°59'45.0"E
E8	PL396/2017	130.5	RRL	3n	M	E	Pedersker, Bornholm	Danemark	55°02'07.2"N	14°59'45.0"E
F8	PL397/2017	162.7	RRL	3n	M	E	Pedersker, Bornholm	Danemark	55°02'07.2"N	14°59'45.0"E
G8	PL398/2017	51.2	RRL	?	F	E	Pedersker, Bornholm	Danemark	55°02'07.2"N	14°59'45.0"E
H8	PL399/2017	131.7	RRL	?	F	E	Pedersker, Bornholm	Danemark	55°02'07.2"N	14°59'45.0"E
A9	PL400/2017	144.8	LLR	3n	M	E	Pedersker, Bornholm	Danemark	55°02'07.2"N	14°59'45.0"E
B9	PL401/2017	32.8	RRL	?	F	E	Pedersker, Bornholm	Danemark	55°02'07.2"N	14°59'45.0"E
C9	PL402/2017	112.3	RRL	3n	M	E	Pedersker, Bornholm	Danemark	55°02'07.2"N	14°59'45.0"E
D9	PL403/2017	69.3	RRL	3n	M	E	Pedersker, Bornholm	Danemark	55°02'07.2"N	14°59'45.0"E
E9	PL404/2017	158.4	RRL	3n	M	E	Pedersker, Bornholm	Danemark	55°02'07.2"N	14°59'45.0"E
F9	PL405/2017	164.6	RRL	3n	M	E	Pedersker, Bornholm	Danemark	55°02'07.2"N	14°59'45.0"E
G9	PL406/2017	194.1	RRL	3n	M	E	Pedersker, Bornholm	Danemark	55°02'07.2"N	14°59'45.0"E
H9	PL407/2017	120.7	RRL	3n	M	E	Pedersker, Bornholm	Danemark	55°02'07.2"N	14°59'45.0"E
A10	PL408/2017	180.3	RRL	3n	M	E	Pedersker, Bornholm	Danemark	55°02'07.2"N	14°59'45.0"E
B10	PL409/2017	166	RRL	3n	M	E	Pedersker, Bornholm	Danemark	55°02'07.2"N	14°59'45.0"E
C10	PL410/2017	118.7	LLR	3n	M	E	Pedersker, Bornholm	Danemark	55°02'07.2"N	14°59'45.0"E
D10	PL411/2017	170.6	RRL	3n	M	E	Pedersker, Bornholm	Danemark	55°02'07.2"N	14°59'45.0"E
E10	PL412/2017	82.1	RRL	3n	M	E	Pedersker, Bornholm	Danemark	55°02'07.2"N	14°59'45.0"E
F10	PL413/2017	156.6	RRL	3n	M	E	Pedersker, Bornholm	Danemark	55°02'07.2"N	14°59'45.0"E
G10	PL414/2017	169.4	RRL	3n	M	E	Pedersker, Bornholm	Danemark	55°02'07.2"N	14°59'45.0"E
H10	PL415/2017	142.1	RRL	3n	M	E	Pedersker, Bornholm	Danemark	55°02'07.2"N	14°59'45.0"E
A11	PL416/2017	145.9	RRL	3n	M	E	Pedersker, Bornholm	Danemark	55°02'07.2"N	14°59'45.0"E
B11	PL417/2017	292.1	RRL	3n	M	E	Pedersker, Bornholm	Danemark	55°02'07.2"N	14°59'45.0"E
C11	PL418/2017	67.8	RRL	3n	M	E	Pedersker, Bornholm	Danemark	55°02'07.2"N	14°59'45.0"E
D11	PL419/2017	140.7	LLR	3n	M	E	Pedersker, Bornholm	Danemark	55°02'07.2"N	14°59'45.0"E
E11	PL420/2017	236.1	RRL	3n	M	E	Pedersker, Bornholm	Danemark	55°02'07.2"N	14°59'45.0"E
F11	PL421/2017	172.1	RRL	3n	M	E	Pedersker, Bornholm	Danemark	55°02'07.2"N	14°59'45.0"E
G11	PL2073/2017	48.1	LR	?	?	L-E	Melzower Forst	Germany	53°10'52.2"N	13°56'15.2"E
H11	PL2074/2017	85.7	LR	?	?	L-E	Melzower Forst	Germany	53°10'52.2"N	13°56'15.2"E
A12	PL422/2017	255.4	LLR	3n	F	E	Rügen-020	Germany	54°25'01.6"N	13°23'45.9"E
B12	PL423/2017	181.6	LLR	3n	M	E	Rügen-020	Germany	54°25'01.6"N	13°23'45.9"E
C12	PL424/2017	121.2	LLR	3n	M	E	Rügen-020	Germany	54°25'01.6"N	13°23'45.9"E
D12	PL425/2017	281.4	LR	2n	F	E	Rügen-020	Germany	54°25'01.6"N	13°23'45.9"E
E12	PL426/2017	132.8	LR	2n	F	E	Rügen-020	Germany	54°25'01.6"N	13°23'45.9"E
F12	PL427/2017	103	LR	2n	F	E	Rügen-020	Germany	54°25'01.6"N	13°23'45.9"E
G12	PL428/2017	190.8	LLR	3n	M	E	Rügen-020	Germany	54°25'01.6"N	13°23'45.9"E
H12	PL429/2017	214.3	LR	?	M	E	Rügen-020	Germany	54°25'01.6"N	13°23'45.9"E

## Sheet: Plate_7
									Coordinates
Pos.	Sample ID	DNA_Concentration (ng/µl)	Genotype	Ploidy	Sex	System	Population	Country	North	East
A1	PL430/2017	187.5	LR	2n	F	E	Rügen	Germany	54°25'01.6"N	13°23'45.9"E
B1	PL431/2017	96.2	LR	2n	F	E	Rügen	Germany	54°25'01.6"N	13°23'45.9"E
C1	PL432/2017	204.4	LLR	3n	F	E	Rügen	Germany	54°25'01.6"N	13°23'45.9"E
D1	PL433/2017	200.5	LR	2n	F	E	Rügen	Germany	54°25'01.6"N	13°23'45.9"E
E1	PL434/2017	193.2	LLR	3n	M	E	Rügen	Germany	54°25'01.6"N	13°23'45.9"E
F1	PL435/2017	205.2	LR	2n	F	E	Rügen	Germany	54°25'01.6"N	13°23'45.9"E
G1	PL436/2017	214.5	LR	2n	F	E	Rügen	Germany	54°25'01.6"N	13°23'45.9"E
H1	PL437/2017	313	LR	2n	F	E	Rügen	Germany	54°25'01.6"N	13°23'45.9"E
A2	PL438/2017	159.6	LR	2n	F	E	Rügen	Germany	54°25'01.6"N	13°23'45.9"E
B2	PL439/2017	310	RRL	3n	M	E	Rügen	Germany	54°25'01.6"N	13°23'45.9"E
C2	PL440/2017	177.4	LLR	3n	M	E	Rügen	Germany	54°25'01.6"N	13°23'45.9"E
D2	PL441/2017	110	RRL	3n	M	E	Rügen	Germany	54°25'01.6"N	13°23'45.9"E
E2	PL442/2017	397.2	RRL	3n	F	E	Rügen	Germany	54°25'01.6"N	13°23'45.9"E
F2	PL443/2017	72.7	RRL	3n	M	E	Rügen	Germany	54°25'01.6"N	13°23'45.9"E
G2	PL444/2017	44.5	LLR	3n	M	E	Rügen	Germany	54°25'01.6"N	13°23'45.9"E
H2	PL445/2017	137.1	LR	2n	F	E	Rügen	Germany	54°25'01.6"N	13°23'45.9"E
A3	PL446/2017	137.8	LR	2n	M	E	Rügen	Germany	54°25'01.6"N	13°23'45.9"E
B3	PL447/2017	198.8	LR	2n	M	E	Rügen	Germany	54°25'01.6"N	13°23'45.9"E
C3	PL448/2017	216	RRL	3n	F	E	Rügen	Germany	54°25'01.6"N	13°23'45.9"E
D3	PL449/2017	357.5	RRL	3n	F	E	Rügen	Germany	54°25'01.6"N	13°23'45.9"E
E3	PL450/2017	175	LR	2n	F	E	Rügen	Germany	54°25'01.6"N	13°23'45.9"E
F3	PL451/2017	124	RRL	3n	M	E	Rügen	Germany	54°25'01.6"N	13°23'45.9"E
G3	PL452/2017	154.5	LR	2n	f	E	Rügen	Germany	54°25'01.6"N	13°23'45.9"E
H3	PL453/2017	248.8	RRL	3n	M	E	Rügen	Germany	54°25'01.6"N	13°23'45.9"E
A4	PL454/2017	298.4	LR	2n	F	E	Rügen	Germany	54°25'01.6"N	13°23'45.9"E
B4	PL455/2017	275.5	LR	2n	F	E	Rügen	Germany	54°25'01.6"N	13°23'45.9"E
C4	PL456/2017	302.2	RRL	3n	F	E	Rügen	Germany	54°25'01.6"N	13°23'45.9"E
D4	PL457/2017	159.7	RRL	3n	M	E	Rügen	Germany	54°25'01.6"N	13°23'45.9"E
E4	PL458/2017	320.6	LR	2n	?	E	Rügen	Germany	54°25'01.6"N	13°23'45.9"E
F4	PL459/2017	238	LLR	3n	M	E	Rügen	Germany	54°25'01.6"N	13°23'45.9"E
G4	PL460/2017	249.3	RRL	3n	M	E	Rügen	Germany	54°25'01.6"N	13°23'45.9"E
H4	PL461/2017	253.2	RRL	3n	F	E	Rügen	Germany	54°25'01.6"N	13°23'45.9"E
A5	PL462/2017	295.6	RRL	3n	F	E	Rügen	Germany	54°25'01.6"N	13°23'45.9"E
B5	PL463/2017	235.5	LLR	3n	M	E	Rügen	Germany	54°25'01.6"N	13°23'45.9"E
C5	PL464/2017	330.3	LLR	3n	M	E	Rügen	Germany	54°25'01.6"N	13°23'45.9"E
D5	PL465/2017	256.6	LLR	3n	M	E	Rügen	Germany	54°25'01.6"N	13°23'45.9"E
E5	PL466/2017	285.3	LLR	3n	F	E	Rügen	Germany	54°25'01.6"N	13°23'45.9"E
F5	PL467/2017	129.5	LR	2n	F	E	Rügen	Germany	54°25'01.6"N	13°23'45.9"E
G5	PL468/2017	244.3	LLR	3n	M	E	Rügen	Germany	54°25'01.6"N	13°23'45.9"E
H5	PL469/2017	295.8	LLR	3n	?	E	Rügen	Germany	54°25'01.6"N	13°23'45.9"E
A6	PL470/2017	379	LLR	3n	?	E	Rügen	Germany	54°25'01.6"N	13°23'45.9"E
B6	PL471/2017	364.6	LLR	3n	M	E	Rügen	Germany	54°25'01.6"N	13°23'45.9"E
C6	PL472/2017	267.3	LLR	3n	M	E	Rügen	Germany	54°25'01.6"N	13°23'45.9"E
D6	PL473/2017	385.7	LR	2n	F	E	Rügen	Germany	54°25'01.6"N	13°23'45.9"E
E6	PL474/2017	541.5	LLR	3n	M	E	Rügen	Germany	54°25'01.6"N	13°23'45.9"E
F6	PL475/2017	132.3	LL		?	E	Rügen	Germany	54°25'01.6"N	13°23'45.9"E
G6	PL476/2017	108.1	LR	2n	F	E	Rügen	Germany	54°25'01.6"N	13°23'45.9"E
H6	PL477/2017	444.8	LLR	3n	M	E	Rügen	Germany	54°25'01.6"N	13°23'45.9"E
A7	PL478/2017	398.8	LR	2n	?	E	Rügen	Germany	54°25'01.6"N	13°23'45.9"E
B7	PL479/2017	303.4	LLR	3n	M	E	Rügen	Germany	54°25'01.6"N	13°23'45.9"E
C7	PL480/2017	308.6	LLR	3n	M	E	Rügen	Germany	54°25'01.6"N	13°23'45.9"E
D7	PL481/2017	300.4	LLR	3n	M	E	Rügen	Germany	54°25'01.6"N	13°23'45.9"E
E7	PL482/2017	287	LLR	3n	M	E	Rügen	Germany	54°25'01.6"N	13°23'45.9"E
F7	PL483/2017	270.2	LLR	3n	M	E	Rügen	Germany	54°25'01.6"N	13°23'45.9"E
G7	PL484/2017	320.4	LLR	3n	M	E	Rügen	Germany	54°25'01.6"N	13°23'45.9"E
H7	PL485/2017	392.3	LLR	3n	M	E	Rügen	Germany	54°25'01.6"N	13°23'45.9"E
A8	PL486/2017	425.1	LLR	3n	M	E	Rügen	Germany	54°25'01.6"N	13°23'45.9"E
B8	PL487/2017	136.6	LLR	3n	M	E	Rügen	Germany	54°25'01.6"N	13°23'45.9"E
C8	PL488/2017	202.9	LLR	3n	M	E	Rügen	Germany	54°25'01.6"N	13°23'45.9"E
D8	PL489/2017	242	LLR	3n	M	E	Rügen	Germany	54°25'01.6"N	13°23'45.9"E
E8	PL490/2017	299.5	LLR	3n	M	E	Rügen	Germany	54°25'01.6"N	13°23'45.9"E
F8	PL491/2017	489.3	LLR	3n	M	E	Rügen	Germany	54°25'01.6"N	13°23'45.9"E
G8	PL492/2017	201.9	LLR	3n	M	E	Rügen	Germany	54°25'01.6"N	13°23'45.9"E
H8	PL493/2017	183.8	LLR	3n	F	E	Rügen	Germany	54°25'01.6"N	13°23'45.9"E
A9	PL494/2017	155.9	LLR	3n	M	E	Rügen	Germany	54°25'01.6"N	13°23'45.9"E
B9	PL495/2017	265.2	LLR	3n	M	E	Rügen	Germany	54°25'01.6"N	13°23'45.9"E
C9	PL496/2017	367.4	LLR	3n	M	E	Rügen	Germany	54°25'01.6"N	13°23'45.9"E
D9	PL497/2017	400.5	LLR	3n	F	E	Rügen	Germany	54°25'01.6"N	13°23'45.9"E
E9	PL498/2017	443.4	LLR	3n	F	E	Rügen	Germany	54°25'01.6"N	13°23'45.9"E
F9	PL499/2017	239.1	LLR	3n	M	E	Rügen	Germany	54°25'01.6"N	13°23'45.9"E
G9	PL500/2017	227.6	LLR	3n	M	E	Rügen	Germany	54°25'01.6"N	13°23'45.9"E
H9	PL501/2017	182.9	LLR	3n	M	E	Rügen	Germany	54°25'01.6"N	13°23'45.9"E
A10	PL502/2017	253.2	LLR	3n	F	E	Rügen	Germany	54°25'01.6"N	13°23'45.9"E
B10	PL503/2017	213.2	LR	2n	F	E	Fehmarn	Germany	54°31'10.1"N	11°03'14.1"E
C10	PL504/2017	250.5	LLR	3n	F	E	Fehmarn	Germany	54°31'10.1"N	11°03'14.1"E
D10	PL505/2017	141.1	LR	2n	M	E	Fehmarn	Germany	54°31'10.1"N	11°03'14.1"E
E10	PL506/2017	50.9	LLR	3n	F	E	Fehmarn	Germany	54°31'10.1"N	11°03'14.1"E
F10	PL507/2017	224.5	LR	2n	M	E	Fehmarn	Germany	54°31'10.1"N	11°03'14.1"E
G10	PL508/2017	233	LLR	3n	M	E	Fehmarn	Germany	54°31'10.1"N	11°03'14.1"E
H10	PL509/2017	166.7	LR	?	M	E	Fehmarn	Germany	54°31'10.1"N	11°03'14.1"E
A11	PL510/2017	345.6	LR	2n	M	E	Fehmarn	Germany	54°31'10.1"N	11°03'14.1"E
B11	PL511/2017	219	LLR	3n	M	E	Fehmarn	Germany	54°31'10.1"N	11°03'14.1"E
C11	PL512/2017	224.5	LR	2n	M	E	Fehmarn	Germany	54°31'10.1"N	11°03'14.1"E
D11	PL513/2017	175.7	LLR	3n	F	E	Fehmarn	Germany	54°31'10.1"N	11°03'14.1"E
E11	PL514/2017	199.7	LR	2n	M	E	Fehmarn	Germany	54°31'10.1"N	11°03'14.1"E
F11	PL515/2017	195.9	LLR	3n	?	E	Fehmarn	Germany	54°31'10.1"N	11°03'14.1"E
G11	PL516/2017	208.9	LLR	3n	?	E	Fehmarn	Germany	54°31'10.1"N	11°03'14.1"E
H11	PL517/2017	277.9	LLR	3n	F	E	Fehmarn	Germany	54°31'10.1"N	11°03'14.1"E
A12	PL518/2017	194.8	LR	?	F	E	Fehmarn	Germany	54°31'10.1"N	11°03'14.1"E
B12	PL519/2017	345.8	LR	2n	F	E	Fehmarn	Germany	54°31'10.1"N	11°03'14.1"E
C12	PL520/2017	75	LLR	3n	M	E	Fehmarn	Germany	54°31'10.1"N	11°03'14.1"E
D12	PL521/2017	174.1	LR	2n	F	E	Fehmarn	Germany	54°31'10.1"N	11°03'14.1"E
E12	PL522/2017	152.5	LLR	3n	M	E	Fehmarn	Germany	54°31'10.1"N	11°03'14.1"E
F12	PL523/2017	69.4	LR	2n	M	E	Fehmarn	Germany	54°31'10.1"N	11°03'14.1"E
G12	PL524/2017	153.7	LR	2n	F	E	Fehmarn	Germany	54°31'10.1"N	11°03'14.1"E
H12	PL525/2017	208.8	LR	2n	F	E	Fehmarn	Germany	54°31'10.1"N	11°03'14.1"E

## Sheet: Explanation
Supplementary material e1: Sample information
Pos.	position of the sample in the sequencing well plate
Genotype	LL	Pelophylax lessonae
	RR	Pelophylax ridibundus
	LR	Pelophylax esculentus - diploid (2n)
	LLR	Pelophylax esculentus - triploid (3n) with two lessonae genomes
	RRL	Pelophylax esculentus - triploid (3n) with two ridibundus genomes
	ESC	Pelophylax esculentus - unknown ploidy and genome composition
System	Population system:		R	all-P. ridibundus population
			R-E	P. ridibundus - P. esculentus population
			L-E	P. lessonae - P. esculentus population
			E	all-hybrid (P. esculentus) population
			?	population system unknown / unclear
Ploidy	according to the GT-Seq read-coverage analysis (see chapter 2.5.1), performed only on hybrids
	2n	diploid
	3n	triploid
	?	not enough data / unclear
	*	discrepancy
