# Supplementary material for: New insights into the molecular basis of gametogenesis in the hybridogenetic water frog Pelophylax esculentus
Source: Research Square preprint supplement (doi:10.21203/rs.3.rs-6224694/v1), 2025-05-07
Supplement: Supplementary file 2 [file 8d138550d605fed3c8c93276.xlsx]

## Sheet: Master table
Supplementary material e_8: Master table of SNPs and individuals genotyped.
Genotype	consensus genotype and ploidy (microsatellite and/or allozyme markers, erythrocyte measurements, GT-Seq analysis)									Ploidy GT-Seq		according to the GT-Seq read analysis, performed only on hybrids
	LL	Pelophylax lessonae		L = lessonae-specific genome								2n	diploid
	RR	Pelophylax ridibundus		R = ridibundus-specific genome								3n	triploid
	LR	Pelophylax esculentus, diploid hybrid										?	poor data / unclear
	LLR	Pelophylax esculentus, triploid hybrid with duplicated L genome										Discrepancy marked red.
	RRL	Pelophylax esculentus, triploid hybrid with duplicated R genome
	ESC	Pelophylax esculentus of unknown genotype and ploidy
	?	unspecified
System = population system			R		all-Pelophylax ridibundus population
			R-E		P. ridibundus - P. esculentus population					Sex	M	male
			L-E		P. lessonae - P. esculentus population						F	female
			E		all-hybrid (P. esculentus) population						juv	juvenile
			?		unknown / unclear population system						sub	subadult
											?	unspecified
SNP ID	1-131: gametogenic genes, 132-172: respiratory genes
Fasta Nr.	position of an SNP retrieved from the alignment of the sequencing reads
	and the reference sequence (composed of transcriptome sequences)
Genotype per locus		two alleles per locus, except SNP Nr. 48 (kif22) with three alleles					L-specific alleles
		diploid genotype marked grey					R-specific alleles
		-	missing data: less than 10 reads per SNP position (total coverage)				unspecific alleles
					SNP ID	1				2				3				4				5				6				7				8				9				10				11
					Gene	adcy9				adcy9				brd2				brd2				brd2				btrc				bub3				bub3				camk2g				camk2g				camk2g
					Fasta Nr.	2433				2445				4524				5022				5208				7851				8550				8859				10788				10812				10914
Sample ID	Genotype	Ploidy Gt-seq	Sex	System	Population / Genotype per locus	G	A	G		T	C	T		T	C	T		G	A	G		A	A	T		G	A	G		A	A	G		C	C	T		C	C	T		C	C	T		C	A	C
B_143	LR	2n	F	R-E (?)	Borovec, okres Nový Jičín [CZ ]	R	1	1		Y	1	1		T	0	2		-				-				-				R	1	1		-				Y	1	1		Y	1	1		M	1	1
B_144	LR	2n	M	R-E (?)	Borovec, okres Nový Jičín [CZ ]	R	1	1		Y	1	1		T	0	2		-				-				-				R	1	1		Y	1	1		Y	1	1		Y	1	1		M	1	1
B_145	LR	2n	M	R-E (?)	Borovec, okres Nový Jičín [CZ ]	R	1	1		Y	1	1		T	0	2		-				A	2	0		-				R	1	1		-				Y	1	1		Y	1	1		M	1	1
B_146	LR	2n	M	R-E (?)	Borovec, okres Nový Jičín [CZ ]	R	1	1		Y	1	1		-				-				-				-				R	1	1		-				-				-				M	1	1
B_147	LR	2n	M	R-E (?)	Borovec, okres Nový Jičín [CZ ]	R	1	1		Y	1	1		T	0	2		-				A	2	0		-				R	1	1		-				Y	1	1		Y	1	1		M	1	1
B_148	RR		M	R-E (?)	Borovec, okres Nový Jičín [CZ ]	G	0	2		T	0	2		-				-				-				-				-				-				-				-				-
B_149	RR		M	R-E (?)	Borovec, okres Nový Jičín [CZ ]	G	0	2		T	0	2		-				-				-				-				-				-				-				-				-
B_150	RR		M	R-E (?)	Borovec, okres Nový Jičín [CZ ]	G	0	2		T	0	2		C	2	0		G	0	2		T	0	2		-				A	2	0		-				C	2	0		C	2	0		C	0	2
B_151	RR		M	R-E (?)	Borovec, okres Nový Jičín [CZ ]	G	0	2		T	0	2		T	0	2		-				-				-				A	2	0		-				Y	1	1		C	2	0		C	0	2
B_152	RR		M	R-E (?)	Borovec, okres Nový Jičín [CZ ]	G	0	2		T	0	2		T	0	2		-				A	2	0		-				A	2	0		-				Y	1	1		C	2	0		C	0	2
B_153	LR	2n	M	R-E (?)	Borovec, okres Nový Jičín [CZ ]	R	1	1		Y	1	1		Y	1	1		-				-				-				R	1	1		-				-				-				M	1	1
B_154	RR		M	R-E (?)	Borovec, okres Nový Jičín [CZ ]	G	0	2		T	0	2		-				-				-				-				-				-				-				-				-
B_155	?	?	?	R-E (?)	Borovec, okres Nový Jičín [CZ ]	-				-				-				-				-				-				-				-				-				-				-
B_156	LR	2n	F	R-E (?)	Borovec, okres Nový Jičín [CZ ]	R	1	1		Y	1	1		T	0	2		A	2	0		A	2	0		R	1	1		R	1	1		Y	1	1		Y	1	1		Y	1	1		M	1	1
B_157	LR	2n	F	R-E (?)	Borovec, okres Nový Jičín [CZ ]	R	1	1		Y	1	1		T	0	2		-				A	2	0		R	1	1		R	1	1		-				Y	1	1		Y	1	1		M	1	1
B_158	LR	2n	F	R-E (?)	Borovec, okres Nový Jičín [CZ ]	R	1	1		Y	1	1		T	0	2		A	2	0		A	2	0		R	1	1		R	1	1		Y	1	1		Y	1	1		Y	1	1		M	1	1
B_159	LLR	3n	M	R-E (?)	Borovec, okres Nový Jičín [CZ ]	R	1	1		Y	1	1		Y	1	1		R	1	1		W	1	1		-				R	1	1		-				Y	1	1		Y	1	1		M	1	1
B_160	LLR	3n	M	R-E (?)	Borovec, okres Nový Jičín [CZ ]	R	1	1		Y	1	1		T	0	2		-				A	2	0		-				R	1	1		-				C	2	0		T	0	2		M	1	1
B_161	LR	2n	F	R-E (?)	Borovec, okres Nový Jičín [CZ ]	R	1	1		Y	1	1		T	0	2		-				A	2	0		R	1	1		R	1	1		Y	1	1		Y	1	1		Y	1	1		M	1	1
B_162	LR	2n	F	R-E (?)	Borovec, okres Nový Jičín [CZ ]	R	1	1		Y	1	1		T	0	2		-				A	2	0		R	1	1		R	1	1		Y	1	1		Y	1	1		Y	1	1		M	1	1
B_163	LR	2n	F	R-E (?)	Borovec, okres Nový Jičín [CZ ]	R	1	1		Y	1	1		T	0	2		-				A	2	0		-				R	1	1		Y	1	1		Y	1	1		Y	1	1		M	1	1
B_164	LR	2n	F	R-E (?)	Borovec, okres Nový Jičín [CZ ]	R	1	1		Y	1	1		T	0	2		-				A	2	0		-				R	1	1		-				Y	1	1		Y	1	1		M	1	1
BU_215	RR		M	R	Eleshnitsa [BG]	G	0	2		T	0	2		-				-				-				-				A	2	0		-				-				-				-
BU_216	RR		M	R	Eleshnitsa [BG]	G	0	2		T	0	2		-				-				-				-				-				-				-				-				-
BU_217	RR		M	R	Eleshnitsa [BG]	G	0	2		T	0	2		T	0	2		-				A	2	0		-				A	2	0		-				C	2	0		C	2	0		C	0	2
BU_218	RR		M	R	Brodilovo [BG]	G	0	2		T	0	2		T	0	2		-				A	2	0		-				A	2	0		-				C	2	0		C	2	0		C	0	2
BU_219	RR		M	R	Brodilovo [BG]	G	0	2		T	0	2		Y	1	1		-				W	1	1		G	0	2		A	2	0		C	2	0		C	2	0		C	2	0		C	0	2
BU_220	RR		M	R	Brodilovo [BG]	G	0	2		T	0	2		T	0	2		-				-				-				A	2	0		-				-				-				C	0	2
BU_221	RR		M	R	Brodilovo [BG]	G	0	2		T	0	2		T	0	2		-				A	2	0		-				A	2	0		C	2	0		C	2	0		C	2	0		C	0	2
BU_222	RR		F	R	Brodilovo [BG]	G	0	2		T	0	2		-				-				-				-				-				-				-				-				-
C_52	RR		F	R	Cítov, okres Mělník [CZ]	G	0	2		T	0	2		C	2	0		G	0	2		T	0	2		G	0	2		A	2	0		T	0	2		C	2	0		C	2	0		C	0	2
C_53	RR		F	R	Cítov, okres Mělník [CZ]	G	0	2		T	0	2		Y	1	1		R	1	1		W	1	1		G	0	2		A	2	0		T	0	2		Y	1	1		C	2	0		C	0	2
C_54	RR		F	R	Cítov, okres Mělník [CZ]	G	0	2		T	0	2		C	2	0		-				T	0	2		G	0	2		A	2	0		T	0	2		C	2	0		C	2	0		C	0	2
C_55	RR		F	R	Cítov, okres Mělník [CZ]	G	0	2		T	0	2		C	2	0		G	0	2		T	0	2		G	0	2		A	2	0		-				C	2	0		C	2	0		C	0	2
C_56	RR		F	R	Cítov, okres Mělník [CZ]	G	0	2		T	0	2		Y	1	1		R	1	1		W	1	1		-				A	2	0		T	0	2		C	2	0		C	2	0		C	0	2
C_57	RR		F	R	Cítov, okres Mělník [CZ]	G	0	2		T	0	2		T	0	2		A	2	0		A	2	0		G	0	2		A	2	0		T	0	2		C	2	0		C	2	0		C	0	2
C_58	RR		F	R	Cítov, okres Mělník [CZ]	G	0	2		T	0	2		Y	1	1		R	1	1		W	1	1		-				A	2	0		T	0	2		C	2	0		C	2	0		C	0	2
C_59	RR		F	R	Cítov, okres Mělník [CZ]	G	0	2		T	0	2		Y	1	1		R	1	1		W	1	1		G	0	2		A	2	0		T	0	2		C	2	0		C	2	0		C	0	2
C_60	RR		F	R	Cítov, okres Mělník [CZ]	G	0	2		T	0	2		T	0	2		-				A	2	0		G	0	2		A	2	0		T	0	2		C	2	0		C	2	0		C	0	2
C_61	RR		F	R	Cítov, okres Mělník [CZ]	G	0	2		T	0	2		Y	1	1		-				W	1	1		G	0	2		A	2	0		T	0	2		C	2	0		C	2	0		C	0	2
C_62	RR		F	R	Cítov, okres Mělník [CZ]	G	0	2		T	0	2		Y	1	1		R	1	1		W	1	1		G	0	2		A	2	0		T	0	2		T	0	2		C	2	0		C	0	2
C_63	RR		F	R	Cítov, okres Mělník [CZ]	G	0	2		T	0	2		Y	1	1		R	1	1		W	1	1		G	0	2		A	2	0		T	0	2		C	2	0		C	2	0		C	0	2
C_64	RR		F	R	Cítov, okres Mělník [CZ]	G	0	2		T	0	2		T	0	2		A	2	0		A	2	0		G	0	2		A	2	0		Y	1	1		C	2	0		C	2	0		C	0	2
C_65	RR		F	R	Cítov, okres Mělník [CZ]	G	0	2		T	0	2		Y	1	1		-				-				-				A	2	0		-				C	2	0		C	2	0		C	0	2
C_66	RR		M	R	Cítov, okres Mělník [CZ]	G	0	2		T	0	2		Y	1	1		-				W	1	1		G	0	2		A	2	0		T	0	2		Y	1	1		C	2	0		C	0	2
C_67	RR		M	R	Cítov, okres Mělník [CZ]	G	0	2		T	0	2		-				-				-				-				-				-				-				-				-
C_68	RR		M	R	Cítov, okres Mělník [CZ]	G	0	2		T	0	2		Y	1	1		R	1	1		W	1	1		G	0	2		A	2	0		T	0	2		Y	1	1		C	2	0		C	0	2
C_69	RR		M	R	Cítov, okres Mělník [CZ]	G	0	2		T	0	2		Y	1	1		-				-				-				A	2	0		-				C	2	0		C	2	0		C	0	2
C_70	RR		M	R	Cítov, okres Mělník [CZ]	G	0	2		T	0	2		T	0	2		-				A	2	0		-				A	2	0		-				C	2	0		C	2	0		C	0	2
C_71	RR		M	R	Cítov, okres Mělník [CZ]	G	0	2		T	0	2		T	0	2		A	2	0		A	2	0		G	0	2		A	2	0		T	0	2		C	2	0		C	2	0		C	0	2
C_72	RR		M	R	Cítov, okres Mělník [CZ]	G	0	2		T	0	2		Y	1	1		R	1	1		W	1	1		G	0	2		A	2	0		T	0	2		Y	1	1		C	2	0		C	0	2
C_73	RR		M	R	Cítov, okres Mělník [CZ]	G	0	2		T	0	2		Y	1	1		-				W	1	1		G	0	2		A	2	0		-				C	2	0		C	2	0		C	0	2
C_74	RR		M	R	Cítov, okres Mělník [CZ]	G	0	2		T	0	2		T	0	2		-				A	2	0		G	0	2		A	2	0		T	0	2		C	2	0		C	2	0		C	0	2
CH_165	LR	2n	F	L-E	Bara, Grubišno Polje [HR]	R	1	1		Y	1	1		T	0	2		A	2	0		A	2	0		R	1	1		R	1	1		Y	1	1		C	2	0		Y	1	1		M	1	1
CH_166	LR	2n	F	L-E	Bara, Grubišno Polje [HR]	R	1	1		Y	1	1		T	0	2		A	2	0		A	2	0		-				R	1	1		Y	1	1		C	2	0		Y	1	1		M	1	1
CH_167	LR	2n	F	L-E	Bara, Grubišno Polje [HR]	R	1	1		Y	1	1		T	0	2		A	2	0		A	2	0		R	1	1		R	1	1		Y	1	1		Y	1	1		Y	1	1		M	1	1
CH_168	LR	2n	M	L-E	Bara, Grubišno Polje [HR]	R	1	1		Y	1	1		T	0	2		-				A	2	0		-				R	1	1		-				-				-				M	1	1
CH_169	LR	2n	M	L-E	Bara, Grubišno Polje [HR]	R	1	1		Y	1	1		T	0	2		A	2	0		A	2	0		R	1	1		R	1	1		Y	1	1		Y	1	1		Y	1	1		M	1	1
CH_170	LR	2n	M	L-E	Bara, Grubišno Polje [HR]	R	1	1		Y	1	1		T	0	2		A	2	0		A	2	0		R	1	1		R	1	1		Y	1	1		C	2	0		Y	1	1		M	1	1
CH_171	LL		F	L-E	Bara, Grubišno Polje [HR]	-				-				-				-				-				-				-				-				-				-				-
CH_172	LL		F	L-E	Bara, Grubišno Polje [HR]	A	2	0		C	2	0		T	0	2		A	2	0		A	2	0		A	2	0		G	0	2		C	2	0		C	2	0		T	0	2		A	2	0
CT_186	LL		M	L-E	Český Těšín [CZ]	A	2	0		C	2	0		T	0	2		A	2	0		A	2	0		-				G	0	2		C	2	0		C	2	0		T	0	2		A	2	0
CT_187	LL		M	L-E	Český Těšín [CZ]	A	2	0		C	2	0		T	0	2		A	2	0		A	2	0		A	2	0		G	0	2		C	2	0		C	2	0		T	0	2		A	2	0
CT_188	LL		M	L-E	Český Těšín [CZ]	A	2	0		C	2	0		T	0	2		A	2	0		A	2	0		A	2	0		G	0	2		C	2	0		C	2	0		T	0	2		A	2	0
CT_189	LL		M	L-E	Český Těšín [CZ]	A	2	0		C	2	0		T	0	2		A	2	0		A	2	0		-				G	0	2		C	2	0		C	2	0		T	0	2		A	2	0
CT_190	LL		M	L-E	Český Těšín [CZ]	A	2	0		C	2	0		T	0	2		A	2	0		A	2	0		A	2	0		G	0	2		C	2	0		C	2	0		T	0	2		A	2	0
CT_191	LL		M	L-E	Český Těšín [CZ]	A	2	0		C	2	0		T	0	2		-				A	2	0		A	2	0		G	0	2		-				C	2	0		T	0	2		A	2	0
CT_192	LL		M	L-E	Český Těšín [CZ]	A	2	0		C	2	0		T	0	2		A	2	0		A	2	0		A	2	0		G	0	2		-				C	2	0		T	0	2		A	2	0
CT_193	LR	2n	F	L-E	Český Těšín [CZ]	R	1	1		Y	1	1		Y	1	1		-				-				-				R	1	1		-				C	2	0		Y	1	1		M	1	1
CT_194	LL		F	L-E	Český Těšín [CZ]	A	2	0		C	2	0		T	0	2		A	2	0		A	2	0		A	2	0		G	0	2		C	2	0		C	2	0		T	0	2		A	2	0
CT_195	LL		F	L-E	Český Těšín [CZ]	A	2	0		C	2	0		T	0	2		A	2	0		A	2	0		A	2	0		G	0	2		C	2	0		C	2	0		T	0	2		A	2	0
CT_196	LR	2n	F	L-E	Český Těšín [CZ]	R	1	1		Y	1	1		Y	1	1		R	1	1		W	1	1		R	1	1		R	1	1		Y	1	1		C	2	0		Y	1	1		M	1	1
CT_197	LR	2n	F	L-E	Český Těšín [CZ]	R	1	1		Y	1	1		Y	1	1		R	1	1		W	1	1		R	1	1		R	1	1		Y	1	1		C	2	0		Y	1	1		M	1	1
CT_198	LR	2n	F	L-E	Český Těšín [CZ]	R	1	1		Y	1	1		Y	1	1		R	1	1		W	1	1		R	1	1		R	1	1		Y	1	1		C	2	0		Y	1	1		M	1	1
CT_199	LR	2n	F	L-E	Český Těšín [CZ]	R	1	1		Y	1	1		T	0	2		A	2	0		A	2	0		R	1	1		R	1	1		Y	1	1		Y	1	1		Y	1	1		M	1	1
D_100	RR		F	R-E	Dolní Benešov [CZ]	G	0	2		T	0	2		C	2	0		G	0	2		T	0	2		G	0	2		A	2	0		T	0	2		T	0	2		C	2	0		C	0	2
D_101	RR		F	R-E	Dolní Benešov [CZ]	G	0	2		T	0	2		T	0	2		A	2	0		A	2	0		G	0	2		A	2	0		T	0	2		Y	1	1		C	2	0		C	0	2
D_75	LR	?	M	R-E	Dolní Benešov [CZ]	-				-				-				-				-				-				-				-				-				-				-
D_76	LR	2n	M	R-E	Dolní Benešov [CZ]	R	1	1		Y	1	1		T	0	2		A	2	0		A	2	0		R	1	1		R	1	1		Y	1	1		C	2	0		Y	1	1		M	1	1
D_77	LR	2n	M	R-E	Dolní Benešov [CZ]	R	1	1		Y	1	1		T	0	2		-				A	2	0		-				R	1	1		-				Y	1	1		Y	1	1		M	1	1
D_78	LR	2n	M	R-E	Dolní Benešov [CZ]	R	1	1		Y	1	1		Y	1	1		R	1	1		W	1	1		R	1	1		R	1	1		Y	1	1		Y	1	1		Y	1	1		M	1	1
D_79	LR	2n	M	R-E	Dolní Benešov [CZ]	R	1	1		Y	1	1		T	0	2		A	2	0		A	2	0		R	1	1		R	1	1		Y	1	1		Y	1	1		Y	1	1		M	1	1
D_80	LR	2n	M	R-E	Dolní Benešov [CZ]	R	1	1		Y	1	1		T	0	2		-				A	2	0		-				R	1	1		Y	1	1		C	2	0		Y	1	1		M	1	1
D_81	LR	2n	M	R-E	Dolní Benešov [CZ]	R	1	1		Y	1	1		-				-				-				-				R	1	1		-				-				-				M	1	1
D_82	LR	2n	M	R-E	Dolní Benešov [CZ]	R	1	1		Y	1	1		T	0	2		-				-				-				R	1	1		-				-				-				M	1	1
D_83	LR	?	M	R-E	Dolní Benešov [CZ]	-				-				-				-				-				-				-				-				-				-				-
D_84	LR	?	M	R-E	Dolní Benešov [CZ]	-				-				-				-				-				-				-				-				-				-				-
D_85	LR	2n	M	R-E	Dolní Benešov [CZ]	R	1	1		Y	1	1		T	0	2		A	2	0		A	2	0		R	1	1		R	1	1		Y	1	1		C	2	0		Y	1	1		M	1	1
D_86	LR	2n	M	R-E	Dolní Benešov [CZ]	R	1	1		Y	1	1		T	0	2		A	2	0		A	2	0		R	1	1		R	1	1		Y	1	1		C	2	0		Y	1	1		M	1	1
D_87	LR	2n	M	R-E	Dolní Benešov [CZ]	R	1	1		Y	1	1		T	0	2		-				A	2	0		-				R	1	1		Y	1	1		C	2	0		Y	1	1		M	1	1
D_88	RR		M	R-E	Dolní Benešov [CZ]	G	0	2		T	0	2		T	0	2		-				A	2	0		G	0	2		A	2	0		T	0	2		T	0	2		C	2	0		C	0	2
D_89	RR		F	R-E	Dolní Benešov [CZ]	G	0	2		T	0	2		-				-				-				-				-				-				-				-				-
D_90	RR		F	R-E	Dolní Benešov [CZ]	G	0	2		T	0	2		T	0	2		-				-				-				A	2	0		-				-				-				-
D_91	RR		F	R-E	Dolní Benešov [CZ]	G	0	2		T	0	2		-				-				-				-				A	2	0		-				-				-				C	0	2
D_92	RR		F	R-E	Dolní Benešov [CZ]	G	0	2		T	0	2		T	0	2		-				A	2	0		G	0	2		A	2	0		T	0	2		C	2	0		C	2	0		C	0	2
D_93	RR		F	R-E	Dolní Benešov [CZ]	G	0	2		T	0	2		T	0	2		-				-				-				A	2	0		-				-				-				C	0	2
D_94	RR		F	R-E	Dolní Benešov [CZ]	G	0	2		T	0	2		Y	1	1		-				W	1	1		G	0	2		A	2	0		-				Y	1	1		C	2	0		C	0	2
D_95	RR		F	R-E	Dolní Benešov [CZ]	G	0	2		T	0	2		T	0	2		-				A	2	0		G	0	2		A	2	0		-				Y	1	1		C	2	0		C	0	2
D_96	RR		F	R-E	Dolní Benešov [CZ]	G	0	2		T	0	2		T	0	2		A	2	0		A	2	0		G	0	2		A	2	0		T	0	2		T	0	2		C	2	0		C	0	2
D_97	RR		F	R-E	Dolní Benešov [CZ]	G	0	2		T	0	2		T	0	2		A	2	0		A	2	0		G	0	2		A	2	0		Y	1	1		Y	1	1		C	2	0		C	0	2
D_98	RR		F	R-E	Dolní Benešov [CZ]	G	0	2		T	0	2		T	0	2		A	2	0		A	2	0		G	0	2		A	2	0		T	0	2		Y	1	1		C	2	0		C	0	2
D_99	RR		F	R-E	Dolní Benešov [CZ]	G	0	2		T	0	2		Y	1	1		G	0	2		W	1	1		G	0	2		A	2	0		T	0	2		C	2	0		C	2	0		C	0	2
H_173	RR		M	R	Kapuvár [HU]	G	0	2		T	0	2		-				-				-				-				A	2	0		-				-				-				-
H_174	RR		M	R	Kapuvár [HU]	G	0	2		T	0	2		-				-				-				-				A	2	0		-				-				-				-
H_175	RR		M	R	Kapuvár [HU]	G	0	2		T	0	2		T	0	2		A	2	0		A	2	0		G	0	2		A	2	0		T	0	2		Y	1	1		C	2	0		C	0	2
H_176	RR		M	R	Kapuvár [HU]	G	0	2		T	0	2		T	0	2		-				-				-				A	2	0		-				-				-				C	0	2
H_177	RR		M	R	Kapuvár [HU]	G	0	2		T	0	2		T	0	2		-				A	2	0		G	0	2		A	2	0		-				T	0	2		C	2	0		C	0	2
H_178	RR		F	R	Kapuvár [HU]	G	0	2		T	0	2		T	0	2		-				A	2	0		-				A	2	0		-				Y	1	1		C	2	0		C	0	2
H_179	RR		M	R	Kapuvár [HU]	G	0	2		T	0	2		T	0	2		-				-				-				A	2	0		-				-				-				C	0	2
H_180	RR		M	R	Kapuvár [HU]	G	0	2		T	0	2		T	0	2		-				-				-				A	2	0		-				-				-				C	0	2
H_181	RR		M	R	Kapuvár [HU]	G	0	2		T	0	2		-				-				-				-				A	2	0		-				-				-				-
H_182	RR		M	R	Kapuvár [HU]	G	0	2		T	0	2		T	0	2		-				-				-				A	2	0		-				-				-				C	0	2
H_183	RR		M	R	Kapuvár [HU]	G	0	2		T	0	2		T	0	2		-				A	2	0		G	0	2		A	2	0		T	0	2		Y	1	1		C	2	0		C	0	2
H_184	RR		M	R	Kapuvár [HU]	G	0	2		T	0	2		T	0	2		-				A	2	0		G	0	2		A	2	0		Y	1	1		Y	1	1		C	2	0		C	0	2
H_185	RR		F	R	Kapuvár [HU]	G	0	2		T	0	2		T	0	2		-				-				-				A	2	0		-				-				-				C	0	2
K_1	LR	2n	M	R-E	Košatka, okres Jistebník [CZ]	R	1	1		Y	1	1		T	0	2		A	2	0		A	2	0		R	1	1		R	1	1		Y	1	1		Y	1	1		Y	1	1		M	1	1
K_10	LR	2n	M	R-E	Košatka, okres Jistebník [CZ]	R	1	1		Y	1	1		T	0	2		A	2	0		A	2	0		R	1	1		R	1	1		Y	1	1		Y	1	1		Y	1	1		M	1	1
K_11	LR	2n	M	R-E	Košatka, okres Jistebník [CZ]	R	1	1		Y	1	1		Y	1	1		R	1	1		W	1	1		R	1	1		R	1	1		Y	1	1		Y	1	1		Y	1	1		M	1	1
K_12	LR	2n	M	R-E	Košatka, okres Jistebník [CZ]	R	1	1		Y	1	1		T	0	2		A	2	0		A	2	0		R	1	1		R	1	1		C	2	0		C	2	0		Y	1	1		M	1	1
K_13	LR	2n	M	R-E	Košatka, okres Jistebník [CZ]	R	1	1		Y	1	1		T	0	2		A	2	0		A	2	0		R	1	1		R	1	1		Y	1	1		C	2	0		Y	1	1		M	1	1
K_14	LR	2n	M	R-E	Košatka, okres Jistebník [CZ]	R	1	1		Y	1	1		T	0	2		A	2	0		A	2	0		R	1	1		R	1	1		Y	1	1		C	2	0		Y	1	1		M	1	1
K_15	RR		M	R-E	Košatka, okres Jistebník [CZ]	G	0	2		T	0	2		T	0	2		-				A	2	0		G	0	2		A	2	0		T	0	2		Y	1	1		C	2	0		C	0	2
K_16	RR		M	R-E	Košatka, okres Jistebník [CZ]	G	0	2		T	0	2		T	0	2		A	2	0		A	2	0		G	0	2		A	2	0		T	0	2		C	2	0		C	2	0		C	0	2
K_17	RR		M	R-E	Košatka, okres Jistebník [CZ]	G	0	2		T	0	2		Y	1	1		-				W	1	1		-				A	2	0		-				Y	1	1		C	2	0		C	0	2
K_18	RR		M	R-E	Košatka, okres Jistebník [CZ]	G	0	2		T	0	2		Y	1	1		R	1	1		W	1	1		G	0	2		A	2	0		Y	1	1		T	0	2		C	2	0		C	0	2
K_19	RR		M	R-E	Košatka, okres Jistebník [CZ]	G	0	2		T	0	2		T	0	2		-				A	2	0		G	0	2		A	2	0		T	0	2		Y	1	1		C	2	0		C	0	2
K_2	LR	2n	M	R-E	Košatka, okres Jistebník [CZ]	R	1	1		Y	1	1		T	0	2		A	2	0		A	2	0		R	1	1		R	1	1		Y	1	1		Y	1	1		Y	1	1		M	1	1
K_20	RR		M	R-E	Košatka, okres Jistebník [CZ]	G	0	2		T	0	2		T	0	2		-				A	2	0		G	0	2		A	2	0		T	0	2		T	0	2		C	2	0		C	0	2
K_21	RR		M	R-E	Košatka, okres Jistebník [CZ]	G	0	2		T	0	2		T	0	2		-				A	2	0		G	0	2		A	2	0		T	0	2		Y	1	1		C	2	0		C	0	2
K_22	RR		F	R-E	Košatka, okres Jistebník [CZ]	G	0	2		T	0	2		T	0	2		A	2	0		A	2	0		G	0	2		A	2	0		T	0	2		Y	1	1		C	2	0		C	0	2
K_23	RR		F	R-E	Košatka, okres Jistebník [CZ]	G	0	2		T	0	2		Y	1	1		R	1	1		W	1	1		G	0	2		A	2	0		-				C	2	0		C	2	0		C	0	2
K_24	RR		F	R-E	Košatka, okres Jistebník [CZ]	G	0	2		T	0	2		Y	1	1		R	1	1		W	1	1		G	0	2		A	2	0		Y	1	1		C	2	0		C	2	0		C	0	2
K_25	RR		F	R-E	Košatka, okres Jistebník [CZ]	G	0	2		T	0	2		T	0	2		-				A	2	0		G	0	2		A	2	0		T	0	2		Y	1	1		C	2	0		C	0	2
K_26	RR		F	R-E	Košatka, okres Jistebník [CZ]	G	0	2		T	0	2		T	0	2		-				A	2	0		G	0	2		A	2	0		Y	1	1		Y	1	1		C	2	0		C	0	2
K_27	RR		F	R-E	Košatka, okres Jistebník [CZ]	G	0	2		T	0	2		T	0	2		A	2	0		A	2	0		G	0	2		A	2	0		T	0	2		C	2	0		C	2	0		C	0	2
K_28	RR		F	R-E	Košatka, okres Jistebník [CZ]	G	0	2		T	0	2		T	0	2		-				A	2	0		G	0	2		A	2	0		T	0	2		Y	1	1		C	2	0		C	0	2
K_29	RR		F	R-E	Košatka, okres Jistebník [CZ]	G	0	2		T	0	2		T	0	2		-				A	2	0		G	0	2		A	2	0		Y	1	1		Y	1	1		C	2	0		C	0	2
K_3	LR	2n	M	R-E	Košatka, okres Jistebník [CZ]	R	1	1		Y	1	1		T	0	2		-				-				-				R	1	1		-				C	2	0		Y	1	1		M	1	1
K_30	RR		F	R-E	Košatka, okres Jistebník [CZ]	G	0	2		T	0	2		T	0	2		-				A	2	0		G	0	2		A	2	0		T	0	2		T	0	2		C	2	0		C	0	2
K_31	RR		F	R-E	Košatka, okres Jistebník [CZ]	G	0	2		T	0	2		T	0	2		-				A	2	0		-				A	2	0		-				T	0	2		C	2	0		C	0	2
K_4	LR	2n	M	R-E	Košatka, okres Jistebník [CZ]	R	1	1		Y	1	1		T	0	2		-				A	2	0		-				R	1	1		Y	1	1		C	2	0		Y	1	1		M	1	1
K_5	LR	2n	M	R-E	Košatka, okres Jistebník [CZ]	R	1	1		Y	1	1		T	0	2		A	2	0		A	2	0		R	1	1		R	1	1		Y	1	1		C	2	0		Y	1	1		M	1	1
K_6	LR	2n	M	R-E	Košatka, okres Jistebník [CZ]	R	1	1		Y	1	1		T	0	2		-				A	2	0		R	1	1		R	1	1		Y	1	1		Y	1	1		Y	1	1		M	1	1
K_7	LR	2n	M	R-E	Košatka, okres Jistebník [CZ]	R	1	1		Y	1	1		Y	1	1		R	1	1		W	1	1		R	1	1		R	1	1		Y	1	1		C	2	0		Y	1	1		M	1	1
K_8	LR	2n	M	R-E	Košatka, okres Jistebník [CZ]	R	1	1		Y	1	1		T	0	2		-				A	2	0		-				R	1	1		-				Y	1	1		Y	1	1		M	1	1
K_9	LR	2n	M	R-E	Košatka, okres Jistebník [CZ]	R	1	1		Y	1	1		T	0	2		A	2	0		A	2	0		R	1	1		R	1	1		Y	1	1		Y	1	1		Y	1	1		M	1	1
L_129	RRL	3n	M	R-E	Lebus [DE]	R	1	1		Y	1	1		Y	1	1		-				-				R	1	1		R	1	1		-				-				-				M	1	1
L_130	LR	2n	M	R-E	Lebus [DE]	R	1	1		Y	1	1		T	0	2		-				A	2	0		-				R	1	1		Y	1	1		C	2	0		Y	1	1		M	1	1
L_131	LR	2n	M	R-E	Lebus [DE]	A	2	0		C	2	0		T	0	2		A	2	0		A	2	0		R	1	1		R	1	1		Y	1	1		C	2	0		Y	1	1		M	1	1
L_132	LR	2n	M	R-E	Lebus [DE]	R	1	1		Y	1	1		T	0	2		A	2	0		A	2	0		R	1	1		R	1	1		Y	1	1		C	2	0		Y	1	1		M	1	1
L_133	LR	2n	M	R-E	Lebus [DE]	A	2	0		C	2	0		Y	1	1		-				W	1	1		-				R	1	1		-				C	2	0		Y	1	1		M	1	1
L_134	LR	2n	M	R-E	Lebus [DE]	R	1	1		Y	1	1		Y	1	1		R	1	1		W	1	1		-				R	1	1		Y	1	1		Y	1	1		Y	1	1		M	1	1
L_135	RR		M	R-E	Lebus [DE]	G	0	2		T	0	2		Y	1	1		-				-				-				A	2	0		-				C	2	0		C	2	0		C	0	2
L_136	RR		M	R-E	Lebus [DE]	G	0	2		T	0	2		T	0	2		A	2	0		A	2	0		-				A	2	0		-				C	2	0		C	2	0		C	0	2
L_137	RR		M	R-E	Lebus [DE]	G	0	2		T	0	2		T	0	2		A	2	0		A	2	0		G	0	2		A	2	0		Y	1	1		C	2	0		C	2	0		C	0	2
L_138	RR		M	R-E	Lebus [DE]	G	0	2		T	0	2		T	0	2		A	2	0		A	2	0		G	0	2		A	2	0		T	0	2		C	2	0		C	2	0		C	0	2
L_139	RR		M	R-E	Lebus [DE]	G	0	2		T	0	2		T	0	2		A	2	0		A	2	0		G	0	2		A	2	0		-				C	2	0		C	2	0		C	0	2
L_140	RR		M	R-E	Lebus [DE]	G	0	2		T	0	2		C	2	0		G	0	2		T	0	2		G	0	2		A	2	0		T	0	2		C	2	0		C	2	0		C	0	2
L_141	RR		M	R-E	Lebus [DE]	G	0	2		T	0	2		T	0	2		-				A	2	0		G	0	2		A	2	0		T	0	2		C	2	0		C	2	0		C	0	2
L_142	RR		M	R-E	Lebus [DE]	R	1	1		Y	1	1		Y	1	1		R	1	1		W	1	1		G	0	2		A	2	0		Y	1	1		C	2	0		C	2	0		C	0	2
P_102	LR	2n	F	R-E	Karsibor [PL]	R	1	1		Y	1	1		T	0	2		A	2	0		A	2	0		R	1	1		R	1	1		C	2	0		C	2	0		Y	1	1		M	1	1
P_103	RR		F	R-E	Karsibor [PL]	G	0	2		T	0	2		Y	1	1		R	1	1		W	1	1		G	0	2		A	2	0		T	0	2		C	2	0		C	2	0		C	0	2
P_104	RR		F	R-E	Karsibor [PL]	G	0	2		T	0	2		T	0	2		-				A	2	0		-				A	2	0		-				C	2	0		C	2	0		C	0	2
P_105	RR		F	R-E	Karsibor [PL]	G	0	2		T	0	2		T	0	2		A	2	0		A	2	0		-				A	2	0		-				C	2	0		C	2	0		C	0	2
P_106	RR		F	R-E	Karsibor [PL]	G	0	2		T	0	2		C	2	0		-				T	0	2		-				A	2	0		-				C	2	0		C	2	0		C	0	2
P_107	RR		F	R-E	Karsibor [PL]	R	1	1		Y	1	1		T	0	2		A	2	0		A	2	0		G	0	2		A	2	0		T	0	2		C	2	0		C	2	0		C	0	2
P_108	RR		F	R-E	Karsibor [PL]	G	0	2		T	0	2		Y	1	1		R	1	1		W	1	1		G	0	2		A	2	0		T	0	2		C	2	0		C	2	0		C	0	2
P_109	RR		F	R-E	Karsibor [PL]	R	1	1		Y	1	1		Y	1	1		R	1	1		W	1	1		G	0	2		A	2	0		T	0	2		C	2	0		C	2	0		C	0	2
P_110	RR		F	R-E	Karsibor [PL]	G	0	2		T	0	2		Y	1	1		-				W	1	1		-				A	2	0		-				C	2	0		C	2	0		C	0	2
P_111	RR		F	R-E	Karsibor [PL]	G	0	2		T	0	2		T	0	2		-				A	2	0		-				A	2	0		-				C	2	0		C	2	0		C	0	2
P_112	RR		?	R-E	Karsibor [PL]	G	0	2		T	0	2		-				-				-				-				A	2	0		-				-				-				C	0	2
P_113	LR	2n	M	R-E	Karsibor [PL]	A	2	0		C	2	0		-				-				-				-				R	1	1		-				-				-				M	1	1
P_114	LR	2n	?	R-E	Karsibor [PL]	R	1	1		Y	1	1		T	0	2		-				-				-				R	1	1		-				-				-				M	1	1
P_115	LR	2n	M	R-E	Karsibor [PL]	R	1	1		Y	1	1		T	0	2		-				-				-				R	1	1		-				-				-				-
P_116	LR	2n	M	R-E	Karsibor [PL]	R	1	1		Y	1	1		T	0	2		A	2	0		A	2	0		R	1	1		R	1	1		Y	1	1		C	2	0		Y	1	1		M	1	1
P_117	LR	2n	M	R-E	Karsibor [PL]	R	1	1		Y	1	1		Y	1	1		R	1	1		W	1	1		-				R	1	1		-				-				-				M	1	1
P_118	LR	2n	M	R-E	Karsibor [PL]	R	1	1		Y	1	1		T	0	2		-				-				-				R	1	1		-				C	2	0		Y	1	1		M	1	1
P_119	LR	2n	M	R-E	Karsibor [PL]	R	1	1		Y	1	1		Y	1	1		R	1	1		W	1	1		-				R	1	1		Y	1	1		C	2	0		Y	1	1		M	1	1
P_120	LR	2n	M	R-E	Karsibor [PL]	A	2	0		C	2	0		T	0	2		-				A	2	0		R	1	1		R	1	1		Y	1	1		C	2	0		Y	1	1		M	1	1
P_121	LR	2n	M	R-E	Karsibor [PL]	R	1	1		Y	1	1		T	0	2		A	2	0		A	2	0		R	1	1		R	1	1		-				C	2	0		Y	1	1		M	1	1
PL01-2012	RR		F	R	Cítov, okres Mělník [CZ]	G	0	2		T	0	2		-				-				-				-				-				-				-				-				-
PL02-2012	RR		F	R	Cítov, okres Mělník [CZ]	G	0	2		T	0	2		-				-				-				-				A	2	0		-				Y	1	1		C	2	0		C	0	2
PL03-2012	RR		F	R	Cítov, okres Mělník [CZ]	G	0	2		T	0	2		Y	1	1		-				W	1	1		-				A	2	0		T	0	2		Y	1	1		C	2	0		C	0	2
PL04-2012	RR		F	R	Cítov, okres Mělník [CZ]	G	0	2		T	0	2		Y	1	1		A	2	0		W	1	1		-				A	2	0		-				C	2	0		C	2	0		C	0	2
PL05-2012	RR		F	R	Cítov, okres Mělník [CZ]	G	0	2		T	0	2		Y	1	1		R	1	1		W	1	1		G	0	2		A	2	0		T	0	2		Y	1	1		C	2	0		C	0	2
PL06-2012	RR		F	R	Cítov, okres Mělník [CZ]	G	0	2		T	0	2		C	2	0		G	0	2		T	0	2		-				A	2	0		-				Y	1	1		C	2	0		C	0	2
PL07-2012	RR		F	R	Cítov, okres Mělník [CZ]	G	0	2		T	0	2		T	0	2		A	2	0		A	2	0		G	0	2		A	2	0		T	0	2		C	2	0		C	2	0		C	0	2
PL08-2012	RR		F	R	Cítov, okres Mělník [CZ]	G	0	2		T	0	2		T	0	2		-				A	2	0		-				A	2	0		-				C	2	0		C	2	0		C	0	2
PL09-2012	RR		F	R	Cítov, okres Mělník [CZ]	G	0	2		T	0	2		T	0	2		-				A	2	0		-				A	2	0		-				-				-				C	0	2
PL101-2013	RR		M	R	Cítov, okres Mělník [CZ]	-				-				-				-				-				-				-				-				-				-				-
PL102-2013	RR		M	R	Cítov, okres Mělník [CZ]	-				-				-				-				-				-				-				-				-				-				-
PL103-2013	RR		M	R	Cítov, okres Mělník [CZ]	-				-				-				-				-				-				-				-				-				-				-
PL112-2013	RR		M	R-E	Albrechtičky [CZ]	G	0	2		T	0	2		-				-				-				-				-				-				-				-				C	0	2
PL115-2013	RR		F	R-E	Košatka, okres Jistebník [CZ]	G	0	2		T	0	2		-				-				-				-				-				-				-				-				-
PL116-2013	RR		F	R-E	Košatka, okres Jistebník [CZ]	G	0	2		T	0	2		-				-				-				-				-				-				-				-				-
PL117-2013	RR		F	R-E	Košatka, okres Jistebník [CZ]	-				-				-				-				-				-				-				-				-				-				-
PL119-2013	RR		F	R-E	Košatka, okres Jistebník [CZ]	G	0	2		T	0	2		Y	1	1		-				-				-				A	2	0		-				-				-				C	0	2
PL120-2013	RR		M	R	Cítov, okres Mělník [CZ]	G	0	2		T	0	2		-				-				-				-				-				-				-				-				-
PL121-2013	RR		M	R-E	Košatka, okres Jistebník [CZ]	G	0	2		T	0	2		T	0	2		-				-				-				-				-				-				-				C	0	2
PL122-2013	RR		M	R-E	Albrechtičky [CZ]	G	0	2		T	0	2		T	0	2		-				A	2	0		-				A	2	0		-				-				-				C	0	2
PL129-2013	LR	?	M	R-E	Albrechtičky [CZ]	-				-				-				-				-				-				-				-				-				-				-
PL132-2013	LR	?	M	R-E	Košatka, okres Jistebník [CZ]	-				-				-				-				-				-				-				-				-				-				-
PL137-2013	LR	?	M	R-E	Košatka, okres Jistebník [CZ]	-				-				-				-				-				-				-				-				-				-				-
PL138-2013	LR	?	M	R-E	Košatka, okres Jistebník [CZ]	-				-				-				-				-				-				-				-				-				-				-
PL143-2013	RR		F	R-E	Košatka, okres Jistebník [CZ]	G	0	2		T	0	2		Y	1	1		-				W	1	1		-				A	2	0		-				-				-				C	0	2
PL15/2012	RR		F	R-E	Albrechtičky [CZ]	G	0	2		T	0	2		-				-				-				-				-				-				-				-				-
PL16/2012	RR		F	R-E	Albrechtičky [CZ]	G	0	2		T	0	2		T	0	2		-				-				-				A	2	0		-				-				-				C	0	2
PL164	RR		M	R	Šúr, Svätý Jur [SK]	G	0	2		T	0	2		-				-				-				-				A	2	0		-				-				-				C	0	2
PL165	RR		sub	R	Šúr, Svätý Jur [SK]	G	0	2		T	0	2		-				-				A	2	0		-				A	2	0		-				-				-				C	0	2
PL166	RR		M	R	Šúr, Svätý Jur [SK]	G	0	2		T	0	2		-				-				-				-				A	2	0		-				-				-				-
PL167	RR		M	R	Šúr, Svätý Jur [SK]	G	0	2		T	0	2		-				-				-				-				-				-				-				-				-
PL168	RR		M	R	Šúr, Svätý Jur [SK]	-				-				-				-				-				-				-				-				-				-				-
PL169	RR		M	R	Šúr, Svätý Jur [SK]	G	0	2		T	0	2		-				-				-				-				A	2	0		-				-				-				C	0	2
PL170	RR		M	R	Šúr, Svätý Jur [SK]	G	0	2		T	0	2		-				-				-				-				A	2	0		-				-				-				-
PL171	RR		M	R	Šúr, Svätý Jur [SK]	G	0	2		T	0	2		-				-				-				-				-				-				-				-				-
PL17-2012	RR		F	R-E	Albrechtičky [CZ]	G	0	2		T	0	2		T	0	2		-				-				-				A	2	0		-				-				-				C	0	2
PL18-2012	RR		M	R	Cítov, okres Mělník [CZ]	G	0	2		T	0	2		Y	1	1		-				W	1	1		-				A	2	0		-				C	2	0		C	2	0		C	0	2
PL19-2012	RR		M	R	Cítov, okres Mělník [CZ]	G	0	2		T	0	2		Y	1	1		-				-				-				A	2	0		-				C	2	0		C	2	0		C	0	2
PL2001/2017	LL		M	L-E	Untermühle [DE]	A	2	0		C	2	0		-				-				-				-				-				-				-				-				-
PL2002/2017	LLR	?	M	L-E	Untermühle [DE]	R	1	1		Y	1	1		-				-				-				-				-				-				-				-				-
PL2003/2017	LLR	3n	M	L-E	Melzower Forst [DE]	R	1	1		Y	1	1		-				-				-				-				-				-				-				-				-
PL2004/2017	LL		M	L-E	Melzower Forst [DE]	A	2	0		C	2	0		-				-				-				-				-				-				-				-				-
PL2005/2017	LLR	?	M	L-E	Melzower Forst [DE]	R	1	1		Y	1	1		-				-				-				-				R	1	1		-				-				-				-
PL2006/2017	LL		M	L-E	Melzower Forst [DE]	A	2	0		C	2	0		-				-				-				-				G	0	2		-				-				-				A	2	0
PL2007/2017	LLR	?	F	L-E	Melzower Forst [DE]	R	1	1		Y	1	1		-				-				-				-				-				-				-				-				-
PL2008/2017	LR	2n	M	L-E	Melzower Forst [DE]	R	1	1		Y	1	1		-				-				-				-				R	1	1		-				-				-				-
PL2009/2017	LLR	?	M	L-E	Melzower Forst [DE]	R	1	1		Y	1	1		-				-				-				-				-				-				-				-				-
PL2010/2017	LLR	3n	F	L-E	Melzower Forst [DE]	R	1	1		Y	1	1		-				-				-				-				R	1	1		-				-				-				M	1	1
PL2011/2017	LLR	?	F	L-E	Melzower Forst [DE]	R	1	1		Y	1	1		-				-				-				-				G	0	2		-				-				-				-
PL2012/2017	LLR	3n		L-E	Melzower Forst [DE]	R	1	1		Y	1	1		-				-				-				-				R	1	1		-				-				-				-
PL2013/2017	LR	?	juv	L-E	Melzower Forst [DE]	R	1	1		Y	1	1		-				-				-				-				-				-				-				-				-
PL2014/2017	LLR	3n	M	L-E	Melzower Forst [DE]	R	1	1		Y	1	1		-				-				-				-				R	1	1		-				-				-				-
PL2015/2017	LLR	?	juv	L-E	Melzower Forst [DE]	R	1	1		Y	1	1		-				-				-				-				R	1	1		-				-				-				M	1	1
PL2016/2017	LLR	3n	M	L-E	Melzower Forst [DE]	R	1	1		Y	1	1		-				-				-				-				R	1	1		-				-				-				-
PL2017/2017	LLR	3n	M	L-E	Melzower Forst [DE]	R	1	1		Y	1	1		-				-				-				-				R	1	1		-				-				-				M	1	1
PL2018/2017	LLR	?	F	L-E	Melzower Forst [DE]	R	1	1		Y	1	1		-				-				-				-				-				-				-				-				-
PL2019/2017	LLR	3n	M	L-E	Melzower Forst [DE]	R	1	1		Y	1	1		-				-				-				-				G	0	2		-				-				-				-
PL2020/2017	LLR	3n	juv	L-E	Melzower Forst [DE]	R	1	1		Y	1	1		-				-				-				-				R	1	1		-				-				-				-
PL20-2012	RR		M	R	Cítov, okres Mělník [CZ]	G	0	2		T	0	2		Y	1	1		-				-				-				A	2	0		-				-				-				C	0	2
PL2021/2017	LLR	3n	M	L-E	Melzower Forst [DE]	R	1	1		Y	1	1		-				-				-				-				R	1	1		-				-				-				-
PL2022/2017	LR	?	juv	L-E	Melzower Forst [DE]	R	1	1		Y	1	1		-				-				-				-				-				-				-				-				-
PL2023/2017	LR	?	juv	L-E	Melzower Forst [DE]	R	1	1		Y	1	1		-				-				-				-				-				-				-				-				-
PL2024/2017	RRL	?	juv	L-E	Melzower Forst [DE]	R	1	1		Y	1	1		-				-				-				-				-				-				-				-				-
PL2025/2017	LLR	?	juv	L-E	Melzower Forst [DE]	R	1	1		Y	1	1		-				-				-				-				-				-				-				-				-
PL2026/2017	LR	2n	juv	L-E	Melzower Forst [DE]	R	1	1		Y	1	1		-				-				-				-				R	1	1		-				-				-				-
PL2027/2017	LLR	3n	F	L-E	Melzower Forst [DE]	R	1	1		Y	1	1		T	0	2		-				-				-				R	1	1		-				-				-				-
PL2028/2017	RRL	?	F	L-E	Melzower Forst [DE]	R	1	1		Y	1	1		-				-				-				-				R	1	1		-				-				-				-
PL2029/2017	LLR	?	F	L-E	Melzower Forst [DE]	R	1	1		Y	1	1		-				-				-				-				-				-				-				-				-
PL2030/2017	LLR	3n	F	L-E	Melzower Forst [DE]	R	1	1		Y	1	1		-				-				-				-				R	1	1		-				-				-				-
PL2031/2017	LL		M	L-E	Melzower Forst [DE]	A	2	0		C	2	0		-				-				-				-				-				-				-				-				-
PL2032/2017	LR	?	juv	L-E	Melzower Forst [DE]	R	1	1		Y	1	1		-				-				-				-				-				-				-				-				-
PL2033/2017	LLR	3n	F	L-E	Melzower Forst [DE]	R	1	1		Y	1	1		-				-				-				-				G	0	2		-				-				-				-
PL2034/2017	LLR	?	juv	L-E	Melzower Forst [DE]	R	1	1		Y	1	1		-				-				-				-				R	1	1		-				-				-				-
PL2035/2017	LLR	3n	juv	L-E	Melzower Forst [DE]	R	1	1		Y	1	1		-				-				-				-				R	1	1		-				-				-				-
PL2036/2017	LR	?	juv	L-E	Melzower Forst [DE]	R	1	1		Y	1	1		-				-				-				-				-				-				-				-				-
PL2037/2017	LLR	?	juv	L-E	Melzower Forst [DE]	R	1	1		Y	1	1		-				-				-				-				R	1	1		-				-				-				-
PL2038/2017	LLR	3n	juv	L-E	Melzower Forst [DE]	R	1	1		Y	1	1		-				-				-				-				R	1	1		-				-				-				-
PL2039/2017	LLR	?	juv	L-E	Melzower Forst [DE]	R	1	1		Y	1	1		-				-				-				-				R	1	1		-				-				-				-
PL2040/2017	LLR	?	juv	L-E	Melzower Forst [DE]	R	1	1		Y	1	1		-				-				-				-				R	1	1		-				-				-				-
PL2041/2017	LLR	3n	juv	L-E	Melzower Forst [DE]	R	1	1		Y	1	1		Y	1	1		-				W	1	1		-				R	1	1		-				-				-				M	1	1
PL2042/2017	LLR	3n	juv	L-E	Melzower Forst [DE]	R	1	1		Y	1	1		-				-				-				-				G	0	2		-				-				-				A	2	0
PL2043/2017	LLR	3n	juv	L-E	Melzower Forst [DE]	R	1	1		Y	1	1		-				-				-				-				R	1	1		-				-				-				-
PL2044/2017	LLR	3n	F	L-E	Melzower Forst [DE]	R	1	1		Y	1	1		-				-				-				-				R	1	1		-				-				-				-
PL2045/2017	LLR	3n	M	L-E	Melzower Forst [DE]	R	1	1		Y	1	1		-				-				-				-				R	1	1		-				-				-				M	1	1
PL2046/2017	LLR	?	M	L-E	Melzower Forst [DE]	R	1	1		Y	1	1		-				-				-				-				R	1	1		-				-				-				-
PL2047/2017	LR	2n	F	L-E	Melzower Forst [DE]	R	1	1		Y	1	1		-				-				-				-				R	1	1		-				-				-				-
PL2048/2017	LLR	3n	M	L-E	Melzower Forst [DE]	R	1	1		Y	1	1		-				-				-				-				R	1	1		-				-				-				M	1	1
PL2049/2017	LLR	3n	F	L-E	Melzower Forst [DE]	R	1	1		Y	1	1		-				-				-				-				R	1	1		-				-				-				M	1	1
PL2050/2017	LLR	3n	F	L-E	Melzower Forst [DE]	R	1	1		Y	1	1		-				-				-				-				R	1	1		-				-				-				-
PL2051/2017	LLR	3n	F	L-E	Melzower Forst [DE]	R	1	1		Y	1	1		-				-				-				-				R	1	1		-				-				-				M	1	1
PL2052/2017	LLR	3n	M	L-E	Melzower Forst [DE]	R	1	1		Y	1	1		Y	1	1		-				-				-				R	1	1		-				-				-				-
PL2053/2017	LLR	3n	F	L-E	Melzower Forst [DE]	R	1	1		Y	1	1		-				-				-				-				G	0	2		-				-				-				-
PL2054/2017	LLR	?	F	L-E	Melzower Forst [DE]	R	1	1		Y	1	1		-				-				-				-				R	1	1		-				-				-				-
PL2055/2017	LL		F	L-E	Melzower Forst [DE]	A	2	0		C	2	0		-				-				-				-				G	0	2		-				-				-				-
PL2056/2017	LL		M	L-E	Melzower Forst [DE]	A	2	0		C	2	0		-				-				-				-				G	0	2		-				-				-				-
PL2057/2017	LLR	3n	juv	L-E	Melzower Forst [DE]	R	1	1		Y	1	1		-				-				A	2	0		-				R	1	1		-				-				-				A	2	0
PL2058/2017	LL		M	L-E	Melzower Forst [DE]	A	2	0		C	2	0		-				-				-				-				G	0	2		-				-				-				A	2	0
PL2059/2017	LLR	3n	juv	L-E	Melzower Forst [DE]	R	1	1		Y	1	1		-				-				-				-				G	0	2		-				-				-				-
PL2060/2017	LLR	?	juv	L-E	Melzower Forst [DE]	R	1	1		Y	1	1		-				-				-				-				-				-				-				-				-
PL2061/2017	LLR	?	juv	L-E	Melzower Forst [DE]	R	1	1		Y	1	1		-				-				-				-				R	1	1		-				-				-				-
PL2062/2017	LLR	?	juv	L-E	Melzower Forst [DE]	R	1	1		Y	1	1		-				-				-				-				R	1	1		-				-				-				-
PL2063/2017	LR	2n	juv	L-E	Melzower Forst [DE]	R	1	1		Y	1	1		-				-				-				-				R	1	1		-				-				-				-
PL2064/2017	RRL	?	juv	L-E	Melzower Forst [DE]	R	1	1		Y	1	1		-				-				-				-				R	1	1		-				-				-				-
PL2065/2017	LLR	3n	juv	L-E	Melzower Forst [DE]	R	1	1		Y	1	1		T	0	2		-				W	1	1		-				R	1	1		-				-				-				M	1	1
PL2066/2017	LR	2n	juv	L-E	Melzower Forst [DE]	R	1	1		Y	1	1		-				-				-				-				R	1	1		-				-				-				-
PL2067/2017	LLR	3n	juv	L-E	Melzower Forst [DE]	R	1	1		Y	1	1		-				-				-				-				R	1	1		-				-				-				-
PL2068/2017	RRL	3n	juv	L-E	Melzower Forst [DE]	R	1	1		Y	1	1		Y	1	1		-				-				-				R	1	1		-				-				-				-
PL2069/2017	LL		juv	L-E	Melzower Forst [DE]	A	2	0		C	2	0		-				-				-				-				G	0	2		-				-				-				-
PL2070/2017	ESC	?	juv	L-E	Melzower Forst [DE]	-				-				-				-				-				-				-				-				-				-				-
PL2071/2017	LLR	3n	juv	L-E	Melzower Forst [DE]	R	1	1		Y	1	1		T	0	2		-				-				-				R	1	1		-				-				-				A	2	0
PL2072/2017	LLR	?	juv	L-E	Melzower Forst [DE]	R	1	1		Y	1	1		-				-				-				-				-				-				-				-				-
PL2073/2017	LR	?	juv	L-E	Melzower Forst [DE]	R	1	1		Y	1	1		-				-				-				-				-				-				-				-				-
PL2074/2017	LR	?	juv	L-E	Melzower Forst [DE]	R	1	1		Y	1	1		-				-				-				-				-				-				-				-				-
PL21-2012	RR		M	R	Cítov, okres Mělník [CZ]	G	0	2		T	0	2		-				-				-				-				-				-				-				-				-
PL22-2012	RR		M	R	Cítov, okres Mělník [CZ]	G	0	2		T	0	2		Y	1	1		R	1	1		W	1	1		-				A	2	0		T	0	2		C	2	0		C	2	0		C	0	2
PL23-2012	RR		M	R	Cítov, okres Mělník [CZ]	G	0	2		T	0	2		C	2	0		-				T	0	2		-				A	2	0		T	0	2		-				-				C	0	2
PL24-2012	RR		M	R	Cítov, okres Mělník [CZ]	G	0	2		T	0	2		Y	1	1		-				W	1	1		-				A	2	0		-				Y	1	1		C	2	0		C	0	2
PL25-2012	RR		M	R	Cítov, okres Mělník [CZ]	G	0	2		T	0	2		-				-				-				-				-				-				-				-				-
PL26-2012	RR		M	R	Cítov, okres Mělník [CZ]	G	0	2		T	0	2		-				-				-				-				A	2	0		-				-				-				C	0	2
PL27-2012	RR		M	R	Cítov, okres Mělník [CZ]	G	0	2		T	0	2		Y	1	1		-				W	1	1		-				A	2	0		T	0	2		C	2	0		C	2	0		C	0	2
PL28-2012	RR		M	R	Cítov, okres Mělník [CZ]	G	0	2		T	0	2		Y	1	1		-				W	1	1		-				A	2	0		-				-				-				C	0	2
PL285/2017	RR		F	R-E	Lebus [DE]	G	0	2		T	0	2		-				-				-				-				-				-				-				-				-
PL286/2017	RR		M	R-E	Lebus [DE]	G	0	2		T	0	2		T	0	2		A	2	0		A	2	0		G	0	2		A	2	0		T	0	2		C	2	0		C	2	0		C	0	2
PL287/2017	RR		M	R-E	Lebus [DE]	-				-				-				-				-				-				-				-				-				-				-
PL288/2017	LR	2n	M	R-E	Lebus [DE]	R	1	1		Y	1	1		-				-				-				-				R	1	1		-				-				-				-
PL289/2017	RR		M	R-E	Lebus [DE]	-				-				-				-				-				-				-				-				-				-				-
PL290/2017	LR	2n	M	R-E	Lebus [DE]	R	1	1		Y	1	1		-				-				-				-				R	1	1		-				-				-				-
PL291/2017	RR		M	R-E	Lebus [DE]	-				-				-				-				-				-				-				-				-				-				-
PL292/2017	RR		M	R-E	Lebus [DE]	-				-				-				-				-				-				-				-				-				-				-
PL29-2012	RR		M	R	Cítov, okres Mělník [CZ]	-				-				-				-				-				-				-				-				-				-				-
PL293/2017	RR		M	R-E	Lebus [DE]	-				-				-				-				-				-				-				-				-				-				-
PL294/2017	LR	2n	M	R-E	Lebus [DE]	R	1	1		Y	1	1		-				-				-				-				R	1	1		-				-				-				M	1	1
PL295/2017	RR		M	R-E	Lebus [DE]	-				-				-				-				-				-				-				-				-				-				-
PL296/2017	LR	?	M	R-E	Lebus [DE]	-				-				-				-				-				-				-				-				-				-				-
PL297/2017	RR		M	R-E	Lebus [DE]	-				-				-				-				-				-				-				-				-				-				-
PL298/2017	RR		M	R-E	Lebus [DE]	-				-				-				-				-				-				-				-				-				-				-
PL299/2017	RR		M	R-E	Lebus [DE]	-				-				-				-				-				-				-				-				-				-				-
PL300/2017	LR	?	M	R-E	Lebus [DE]	-				-				-				-				-				-				-				-				-				-				-
PL301/2017	RR		M	R-E	Lebus [DE]	-				-				-				-				-				-				-				-				-				-				-
PL302/2017	RR		M	R-E	Lebus [DE]	-				-				-				-				-				-				-				-				-				-				-
PL30-2012	RR		M	R	Cítov, okres Mělník [CZ]	G	0	2		T	0	2		-				-				-				-				-				-				-				-				-
PL303/2017	RR		M	R-E	Lebus [DE]	-				-				-				-				-				-				-				-				-				-				-
PL304/2017	RR		M	R-E	Lebus [DE]	G	0	2		T	0	2		-				-				-				-				A	2	0		-				-				-				C	0	2
PL305/2017	RR		M	R-E	Lebus [DE]	-				-				-				-				-				-				-				-				-				-				-
PL306/2017	RR		M	R-E	Lebus [DE]	-				-				-				-				-				-				-				-				-				-				-
PL307/2017	RR		M	R-E	Lebus [DE]	-				-				-				-				-				-				-				-				-				-				-
PL308/2017	RR		M	R-E	Lebus [DE]	-				-				-				-				-				-				-				-				-				-				-
PL309/2017	RR		M	R-E	Lebus [DE]	G	0	2		T	0	2		-				-				-				-				-				-				-				-				-
PL310/2017	RR		M	R-E	Lebus [DE]	G	0	2		T	0	2		-				-				-				-				-				-				-				-				-
PL311/2017	RR		M	R-E	Lebus [DE]	-				-				-				-				-				-				-				-				-				-				-
PL312/2017	RR		M	R-E	Lebus [DE]	-				-				-				-				-				-				-				-				-				-				-
PL31-2012	RR		M	R	Cítov, okres Mělník [CZ]	G	0	2		T	0	2		-				-				W	1	1		-				-				-				-				-				-
PL313/2017	RR		M	R-E	Lebus [DE]	-				-				-				-				-				-				-				-				-				-				-
PL314/2017	RR		M	R-E	Lebus [DE]	R	1	1		Y	1	1		-				-				-				-				-				-				-				-				-
PL315/2017	RR		M	R-E	Lebus [DE]	R	1	1		Y	1	1		-				-				-				-				A	2	0		-				-				-				C	0	2
PL316/2017	LL		M	L-E	Teschendorf [DE]	A	2	0		C	2	0		-				-				-				-				-				-				-				-				-
PL317/2017	LL		M	L-E	Teschendorf [DE]	A	2	0		C	2	0		-				-				-				-				-				-				-				-				-
PL318/2017	LR	?	M	L-E	Teschendorf [DE]	-				-				-				-				-				-				-				-				-				-				-
PL319/2017	RR		F	?	Friedrichshagen [DE]	-				-				-				-				-				-				-				-				-				-				-
PL320/2017	LLR	3n	M	L-E	Teschendorf [DE]	R	1	1		Y	1	1		T	0	2		-				A	2	0		-				R	1	1		-				C	2	0		Y	1	1		M	1	1
PL321/2017	RR		F	?	Friedrichshagen [DE]	G	0	2		T	0	2		-				-				-				-				-				-				-				-				-
PL322/2017	RR		M	?	Friedrichshagen [DE]	-				-				-				-				-				-				-				-				-				-				-
PL32-2012	RR		M	R	Cítov, okres Mělník [CZ]	G	0	2		T	0	2		Y	1	1		-				W	1	1		-				A	2	0		-				Y	1	1		C	2	0		C	0	2
PL323/2017	LLR	3n	M	L-E	Teschendorf [DE]	R	1	1		Y	1	1		T	0	2		-				A	2	0		-				R	1	1		-				C	2	0		Y	1	1		M	1	1
PL324/2017	LL		M	L-E	Teschendorf [DE]	A	2	0		C	2	0		-				-				-				-				-				-				-				-				-
PL325/2017	LR	?	M	L-E	Teschendorf [DE]	-				-				-				-				-				-				-				-				-				-				-
PL326/2017	LL		M	L-E	Teschendorf [DE]	-				-				-				-				-				-				-				-				-				-				-
PL327/2017	RR		M	?	Friedrichshagen [DE]	-				-				-				-				-				-				-				-				-				-				-
PL328/2017	RR		M	?	Friedrichshagen [DE]	-				-				-				-				-				-				-				-				-				-				-
PL329/2017	LL		F	L-E	Teschendorf [DE]	-				-				-				-				-				-				-				-				-				-				-
PL330/2017	LR	?	M	L-E	Teschendorf [DE]	R	1	1		Y	1	1		-				-				-				-				-				-				-				-				-
PL331/2017	RR		F	?	Friedrichshagen [DE]	-				-				-				-				-				-				-				-				-				-				-
PL332/2017	LL		M	L-E	Teschendorf [DE]	-				-				-				-				-				-				-				-				-				-				-
PL33-2012	RR		M	R	Cítov, okres Mělník [CZ]	G	0	2		T	0	2		-				-				-				-				A	2	0		-				-				-				-
PL333/2017	ESC	?	M	L-E	Teschendorf [DE]	-				-				-				-				-				-				-				-				-				-				-
PL334/2017	LL		F	L-E	Teschendorf [DE]	-				-				-				-				-				-				-				-				-				-				-
PL335/2017	RR		M	?	Friedrichshagen [DE]	-				-				-				-				-				-				-				-				-				-				-
PL336/2017	ESC	?	F	L-E	Teschendorf [DE]	-				-				-				-				-				-				-				-				-				-				-
PL337/2017	LL		M	L-E	Teschendorf [DE]	-				-				-				-				-				-				-				-				-				-				-
PL338/2017	LLR	?	M	L-E	Teschendorf [DE]	R	1	1		Y	1	1		-				-				-				-				-				-				-				-				-
PL339/2017	RR		M	?	Friedrichshagen [DE]	G	0	2		T	0	2		-				-				-				-				-				-				-				-				-
PL340/2017	ESC	?	M	L-E	Teschendorf [DE]	-				-				-				-				-				-				-				-				-				-				-
PL341/2017	RR		M	?	Friedrichshagen [DE]	-				-				-				-				-				-				-				-				-				-				-
PL342/2017	LR	?	M	L-E	Teschendorf [DE]	-				-				-				-				-				-				-				-				-				-				-
PL34-2012	RR		M	R-E	Albrechtičky [CZ]	G	0	2		T	0	2		-				-				-				-				-				-				-				-				-
PL343/2017	LR	2n	M	L-E	Teschendorf [DE]	R	1	1		Y	1	1		Y	1	1		-				-				-				R	1	1		-				-				-				M	1	1
PL344/2017	LR	2n	M	E	Wysoka Kamieńska [PL]	R	1	1		Y	1	1		T	0	2		-				A	2	0		-				R	1	1		-				C	2	0		Y	1	1		M	1	1
PL345/2017	LR	2n	M	E	Wysoka Kamieńska [PL]	R	1	1		Y	1	1		T	0	2		R	1	1		W	1	1		-				R	1	1		Y	1	1		C	2	0		Y	1	1		M	1	1
PL346/2017	LR	2n	M	E	Wysoka Kamieńska [PL]	R	1	1		Y	1	1		Y	1	1		-				W	1	1		-				R	1	1		-				-				-				M	1	1
PL347/2017	RRL	3n	M	E	Wysoka Kamieńska [PL]	R	1	1		Y	1	1		Y	1	1		-				W	1	1		-				R	1	1		Y	1	1		C	2	0		Y	1	1		M	1	1
PL348/2017	LR	2n	M	E	Wysoka Kamieńska [PL]	R	1	1		Y	1	1		T	0	2		-				-				-				R	1	1		-				-				-				M	1	1
PL349/2017	LR	2n	M	E	Wysoka Kamieńska [PL]	R	1	1		Y	1	1		Y	1	1		-				-				-				R	1	1		-				-				-				M	1	1
PL350/2017	LR	2n	M	E	Wysoka Kamieńska [PL]	R	1	1		Y	1	1		T	0	2		-				-				-				R	1	1		-				-				-				M	1	1
PL351/2017	RRL	2n	M	E	Wysoka Kamieńska [PL]	R	1	1		Y	1	1		Y	1	1		-				-				-				R	1	1		-				-				-				M	1	1
PL352/2017	LR	2n	M	E	Wysoka Kamieńska [PL]	R	1	1		Y	1	1		T	0	2		-				-				-				R	1	1		-				-				-				M	1	1
PL35-2012	RR		M	R-E	Albrechtičky [CZ]	G	0	2		T	0	2		-				-				-				-				-				-				-				-				-
PL353/2017	LLR	3n	M	E	Wysoka Kamieńska [PL]	R	1	1		Y	1	1		T	0	2		-				-				-				R	1	1		-				-				-				M	1	1
PL354/2017	RRL	3n	F	E	Wysoka Kamieńska [PL]	R	1	1		Y	1	1		Y	1	1		-				-				-				R	1	1		-				-				-				C	0	2
PL355/2017	RRL	3n	F	E	Wysoka Kamieńska [PL]	R	1	1		Y	1	1		Y	1	1		-				W	1	1		-				R	1	1		-				-				-				M	1	1
PL356/2017	RRL	3n	F	E	Wysoka Kamieńska [PL]	R	1	1		Y	1	1		T	0	2		-				-				-				R	1	1		-				-				-				M	1	1
PL357/2017	LR	2n	F	E	Wysoka Kamieńska [PL]	R	1	1		Y	1	1		-				-				-				-				R	1	1		-				-				-				M	1	1
PL358/2017	LR	2n	F	E	Wysoka Kamieńska [PL]	R	1	1		Y	1	1		-				-				-				-				R	1	1		-				-				-				M	1	1
PL359/2017	LR	2n	F	E	Wysoka Kamieńska [PL]	R	1	1		Y	1	1		-				-				-				-				R	1	1		-				-				-				M	1	1
PL360/2017	LR	2n	F	E	Wysoka Kamieńska [PL]	R	1	1		Y	1	1		-				-				-				-				R	1	1		-				-				-				M	1	1
PL361/2017	RRL	3n	F	E	Wysoka Kamieńska [PL]	R	1	1		Y	1	1		T	0	2		A	2	0		A	2	0		-				R	1	1		-				C	2	0		Y	1	1		M	1	1
PL362/2017	LLR	3n	F	E	Wysoka Kamieńska [PL]	R	1	1		Y	1	1		T	0	2		-				A	2	0		-				R	1	1		C	2	0		-				-				M	1	1
PL36-2012	RR		M	R-E	Albrechtičky [CZ]	G	0	2		T	0	2		Y	1	1		R	1	1		W	1	1		-				A	2	0		T	0	2		-				-				C	0	2
PL363/2017	LR	2n	F	E	Wysoka Kamieńska [PL]	R	1	1		Y	1	1		T	0	2		A	2	0		A	2	0		-				R	1	1		-				C	2	0		Y	1	1		M	1	1
PL364/2017	RRL	3n	F	E	Usedom [DE]	R	1	1		Y	1	1		-				-				-				-				R	1	1		-				-				-				M	1	1
PL365/2017	RRL	3n	M	E	Usedom [DE]	R	1	1		Y	1	1		T	0	2		-				-				-				R	1	1		-				C	2	0		Y	1	1		M	1	1
PL366/2017	LLR	3n	M	E	Usedom [DE]	R	1	1		Y	1	1		Y	1	1		-				A	2	0		-				R	1	1		-				C	2	0		Y	1	1		M	1	1
PL367/2017	LLR	3n	M	E	Usedom [DE]	R	1	1		Y	1	1		T	0	2		-				-				-				R	1	1		-				-				-				A	2	0
PL368/2017	LLR	3n	M	E	Usedom [DE]	R	1	1		Y	1	1		Y	1	1		R	1	1		W	1	1		A	2	0		R	1	1		-				C	2	0		Y	1	1		M	1	1
PL369/2017	LR	2n	M	E	Usedom [DE]	R	1	1		Y	1	1		T	0	2		-				A	2	0		-				R	1	1		-				C	2	0		Y	1	1		M	1	1
PL370/2017	LLR	?	M	E	Usedom [DE]	R	1	1		Y	1	1		-				-				-				-				-				-				-				-				-
PL371/2017	LLR	3n	M	E	Usedom [DE]	A	2	0		C	2	0		-				-				-				-				R	1	1		-				-				-				M	1	1
PL372/2017	LLR	3n	M	E	Usedom [DE]	R	1	1		Y	1	1		Y	1	1		R	1	1		W	1	1		-				R	1	1		-				C	2	0		Y	1	1		M	1	1
PL37-2012	RR		M	R-E	Albrechtičky [CZ]	G	0	2		T	0	2		Y	1	1		R	1	1		W	1	1		G	0	2		A	2	0		T	0	2		Y	1	1		C	2	0		C	0	2
PL373/2017	LLR	3n	M	E	Usedom [DE]	R	1	1		Y	1	1		T	0	2		-				-				-				R	1	1		-				-				-				M	1	1
PL374/2017	LLR	3n	M	E	Usedom [DE]	R	1	1		Y	1	1		-				-				-				-				-				-				-				-				-
PL375/2017	LLR	3n	M	E	Usedom [DE]	R	1	1		Y	1	1		T	0	2		-				-				-				R	1	1		-				-				-				M	1	1
PL376/2017	LLR	3n	M	E	Usedom [DE]	R	1	1		Y	1	1		T	0	2		-				A	2	0		-				R	1	1		C	2	0		C	2	0		Y	1	1		M	1	1
PL377/2017	LLR	3n	M	E	Pedersker, Bornholm [DK]	R	1	1		Y	1	1		T	0	2		-				-				-				R	1	1		-				C	2	0		Y	1	1		M	1	1
PL378/2017	RRL	3n	F	E	Pedersker, Bornholm	R	1	1		Y	1	1		T	0	2		A	2	0		A	2	0		-				R	1	1		-				-				-				M	1	1
PL379/2017	LR	2n	M	E	Pedersker, Bornholm	R	1	1		Y	1	1		T	0	2		-				-				-				R	1	1		-				-				-				M	1	1
PL380/2017	RRL	?	F	E	Pedersker, Bornholm	R	1	1		Y	1	1		-				-				-				-				R	1	1		-				-				-				-
PL381/2017	RRL	3n	M	E	Pedersker, Bornholm	R	1	1		Y	1	1		T	0	2		-				-				-				R	1	1		-				-				-				M	1	1
PL382/2017	RRL	3n	F	E	Pedersker, Bornholm	R	1	1		Y	1	1		-				-				-				-				-				-				-				-				-
PL38-2012	RR		M	R-E	Albrechtičky [CZ]	G	0	2		T	0	2		T	0	2		A	2	0		A	2	0		G	0	2		A	2	0		T	0	2		T	0	2		C	2	0		C	0	2
PL383/2017	RRL	?	M	E	Pedersker, Bornholm [DK]	R	1	1		Y	1	1		-				-				-				-				-				-				-				-				M	1	1
PL384/2017	RRL	3n	F	E	Pedersker, Bornholm [DK]	R	1	1		Y	1	1		T	0	2		-				A	2	0		-				R	1	1		-				-				-				M	1	1
PL385/2017	RRL	3n	M	E	Pedersker, Bornholm [DK]	R	1	1		Y	1	1		-				-				A	2	0		-				R	1	1		-				-				-				M	1	1
PL386/2017	RRL	3n	F	E	Pedersker, Bornholm [DK]	R	1	1		Y	1	1		-				-				-				-				R	1	1		-				-				-				M	1	1
PL387/2017	LR	2n	M	E	Pedersker, Bornholm [DK]	R	1	1		Y	1	1		T	0	2		-				A	2	0		-				R	1	1		-				C	2	0		Y	1	1		M	1	1
PL388/2017	RRL	3n	F	E	Pedersker, Bornholm [DK]	R	1	1		Y	1	1		-				-				-				-				R	1	1		-				-				-				-
PL389/2017	LLR	3n	M	E	Pedersker, Bornholm [DK]	A	2	0		C	2	0		-				-				-				-				R	1	1		-				-				-				M	1	1
PL390/2017	RRL	3n	F	E	Pedersker, Bornholm [DK]	R	1	1		Y	1	1		-				-				-				-				R	1	1		-				-				-				M	1	1
PL391/2017	RRL	?	M	E	Pedersker, Bornholm [DK]	R	1	1		Y	1	1		-				-				-				-				-				-				-				-				-
PL392/2017	LLR	3n	F	E	Pedersker, Bornholm [DK]	R	1	1		Y	1	1		-				-				-				-				R	1	1		-				-				-				-
PL39-2012	RR		M	R-E	Albrechtičky [CZ]	G	0	2		T	0	2		T	0	2		-				-				-				A	2	0		-				-				-				C	0	2
PL393/2017	RRL	3n	M	E	Pedersker, Bornholm [DK]	R	1	1		Y	1	1		-				-				-				-				R	1	1		-				-				-				-
PL394/2017	LLR	3n	M	E	Pedersker, Bornholm [DK]	R	1	1		Y	1	1		T	0	2		A	2	0		A	2	0		-				G	0	2		-				C	2	0		Y	1	1		M	1	1
PL395/2017	LR	2n	M	E	Pedersker, Bornholm [DK]	R	1	1		Y	1	1		T	0	2		-				A	2	0		-				R	1	1		-				-				-				M	1	1
PL396/2017	RRL	3n	M	E	Pedersker, Bornholm [DK]	R	1	1		Y	1	1		-				-				-				-				R	1	1		-				-				-				C	0	2
PL397/2017	RRL	3n	M	E	Pedersker, Bornholm [DK]	R	1	1		Y	1	1		-				-				-				-				R	1	1		-				-				-				M	1	1
PL398/2017	RRL	?	F	E	Pedersker, Bornholm [DK]	R	1	1		Y	1	1		-				-				-				-				-				-				-				-				-
PL399/2017	RRL	?	F	E	Pedersker, Bornholm [DK]	R	1	1		Y	1	1		-				-				-				-				-				-				-				-				-
PL400/2017	LLR	3n	M	E	Pedersker, Bornholm [DK]	R	1	1		Y	1	1		Y	1	1		-				-				-				R	1	1		-				-				-				A	2	0
PL401/2017	RRL	?	F	E	Pedersker, Bornholm [DK]	G	0	2		T	0	2		-				-				-				-				-				-				-				-				-
PL402/2017	RRL	3n	M	E	Pedersker, Bornholm [DK]	R	1	1		Y	1	1		T	0	2		-				-				-				R	1	1		-				-				-				M	1	1
PL403/2017	RRL	3n	M	E	Pedersker, Bornholm [DK]	R	1	1		Y	1	1		-				-				-				-				R	1	1		-				-				-				M	1	1
PL404/2017	RRL	3n	M	E	Pedersker, Bornholm [DK]	R	1	1		Y	1	1		-				-				-				-				R	1	1		-				-				-				M	1	1
PL405/2017	RRL	3n	M	E	Pedersker, Bornholm [DK]	R	1	1		Y	1	1		-				-				-				-				R	1	1		-				-				-				M	1	1
PL406/2017	RRL	3n	M	E	Pedersker, Bornholm [DK]	R	1	1		Y	1	1		-				-				A	2	0		-				-				-				-				-				M	1	1
PL407/2017	RRL	3n	M	E	Pedersker, Bornholm [DK]	R	1	1		Y	1	1		T	0	2		-				-				-				R	1	1		-				-				-				M	1	1
PL408/2017	RRL	3n	M	E	Pedersker, Bornholm [DK]	R	1	1		Y	1	1		T	0	2		-				-				-				A	2	0		-				C	2	0		Y	1	1		M	1	1
PL409/2017	RRL	3n	M	E	Pedersker, Bornholm [DK]	R	1	1		Y	1	1		T	0	2		-				-				-				R	1	1		-				-				-				M	1	1
PL410/2017	LLR	3n	M	E	Pedersker, Bornholm [DK]	R	1	1		Y	1	1		T	0	2		-				A	2	0		-				R	1	1		-				-				-				M	1	1
PL411/2017	RRL	3n	M	E	Pedersker, Bornholm [DK]	R	1	1		Y	1	1		T	0	2		-				W	1	1		-				R	1	1		-				-				-				M	1	1
PL412/2017	RRL	3n	M	E	Pedersker, Bornholm [DK]	R	1	1		Y	1	1		-				-				-				-				R	1	1		-				-				-				M	1	1
PL413/2017	RRL	3n	M	E	Pedersker, Bornholm [DK]	R	1	1		Y	1	1		-				-				-				-				R	1	1		-				-				-				M	1	1
PL414/2017	RRL	3n	M	E	Pedersker, Bornholm [DK]	R	1	1		Y	1	1		-				-				-				-				R	1	1		-				-				-				M	1	1
PL415/2017	RRL	3n	M	E	Pedersker, Bornholm [DK]	-				-				-				-				-				-				-				-				-				-				-
PL416/2017	RRL	3n	M	E	Pedersker, Bornholm [DK]	R	1	1		Y	1	1		T	0	2		-				-				-				R	1	1		-				-				-				M	1	1
PL417/2017	RRL	3n	M	E	Pedersker, Bornholm [DK]	R	1	1		Y	1	1		T	0	2		-				A	2	0		R	1	1		R	1	1		-				C	2	0		Y	1	1		M	1	1
PL418/2017	RRL	3n	M	E	Pedersker, Bornholm [DK]	R	1	1		Y	1	1		-				-				-				-				A	2	0		-				-				-				-
PL419/2017	LLR	3n	M	E	Pedersker, Bornholm [DK]	R	1	1		Y	1	1		T	0	2		-				A	2	0		-				R	1	1		-				-				-				M	1	1
PL420/2017	RRL	3n	M	E	Pedersker, Bornholm [DK]	R	1	1		Y	1	1		T	0	2		A	2	0		-				-				R	1	1		-				-				-				M	1	1
PL421/2017	RRL	3n	M	E	Pedersker, Bornholm [DK]	R	1	1		Y	1	1		T	0	2		-				-				-				R	1	1		-				-				-				-
PL422/2017	LLR	3n	F	E	Rügen [DE]	R	1	1		Y	1	1		T	0	2		-				A	2	0		-				R	1	1		Y	1	1		C	2	0		Y	1	1		M	1	1
PL423/2017	LLR	3n	M	E	Rügen [DE]	R	1	1		Y	1	1		T	0	2		-				A	2	0		-				G	0	2		-				C	2	0		T	0	2		M	1	1
PL424/2017	LLR	3n	M	E	Rügen [DE]	R	1	1		Y	1	1		-				-				A	2	0		-				R	1	1		-				-				-				A	2	0
PL425/2017	LR	2n	F	E	Rügen [DE]	A	2	0		C	2	0		Y	1	1		-				W	1	1		-				R	1	1		C	2	0		C	2	0		Y	1	1		M	1	1
PL426/2017	LR	2n	F	E	Rügen [DE]	A	2	0		C	2	0		-				-				-				-				R	1	1		-				-				-				M	1	1
PL427/2017	LR	2n	F	E	Rügen [DE]	A	2	0		C	2	0		-				-				-				-				R	1	1		-				-				-				M	1	1
PL428/2017	LLR	3n	M	E	Rügen [DE]	R	1	1		Y	1	1		T	0	2		-				A	2	0		-				R	1	1		-				-				-				A	2	0
PL429/2017	LLR	?	M	E	Rügen [DE]	-				-				-				-				-				-				-				-				-				-				-
PL430/2017	LR	2n	F	E	Rügen [DE]	A	2	0		C	2	0		Y	1	1		-				W	1	1		-				R	1	1		-				-				-				M	1	1
PL431/2017	LR	2n	F	E	Rügen [DE]	A	2	0		C	2	0		Y	1	1		-				W	1	1		-				R	1	1		-				-				-				M	1	1
PL432/2017	LLR	3n	F	E	Rügen [DE]	R	1	1		Y	1	1		T	0	2		A	2	0		A	2	0		-				R	1	1		C	2	0		C	2	0		Y	1	1		M	1	1
PL433/2017	LR	2n	F	E	Rügen [DE]	A	2	0		C	2	0		Y	1	1		R	1	1		W	1	1		-				R	1	1		C	2	0		C	2	0		Y	1	1		M	1	1
PL434/2017	LLR	3n	M	E	Rügen [DE]	R	1	1		Y	1	1		T	0	2		A	2	0		A	2	0		-				R	1	1		Y	1	1		C	2	0		Y	1	1		M	1	1
PL435/2017	LR	2n	F	E	Rügen [DE]	A	2	0		C	2	0		Y	1	1		R	1	1		W	1	1		-				R	1	1		C	2	0		C	2	0		Y	1	1		M	1	1
PL436/2017	LR	2n	F	E	Rügen [DE]	A	2	0		C	2	0		Y	1	1		-				W	1	1		-				R	1	1		-				C	2	0		Y	1	1		M	1	1
PL437/2017	LR	2n	F	E	Rügen [DE]	A	2	0		C	2	0		Y	1	1		-				W	1	1		-				R	1	1		C	2	0		C	2	0		Y	1	1		M	1	1
PL438/2017	LR	2n	F	E	Rügen [DE]	R	1	1		Y	1	1		Y	1	1		-				W	1	1		-				R	1	1		-				-				-				M	1	1
PL439/2017	RRL	3n	M	E	Rügen [DE]	R	1	1		Y	1	1		Y	1	1		R	1	1		W	1	1		-				R	1	1		C	2	0		C	2	0		Y	1	1		M	1	1
PL440/2017	LLR	3n	M	E	Rügen [DE]	R	1	1		Y	1	1		T	0	2		-				A	2	0		-				R	1	1		C	2	0		-				-				M	1	1
PL441/2017	RRL	3n	M	E	Rügen [DE]	R	1	1		Y	1	1		Y	1	1		-				W	1	1		-				R	1	1		-				-				-				M	1	1
PL442/2017	RRL	3n	F	E	Rügen [DE]	R	1	1		Y	1	1		T	0	2		-				A	2	0		-				R	1	1		C	2	0		C	2	0		Y	1	1		M	1	1
PL44-2012	RR		M	R-E	Albrechtičky [CZ]	G	0	2		T	0	2		-				-				-				-				A	2	0		-				-				-				C	0	2
PL443/2017	RRL	3n	M	E	Rügen [DE]	R	1	1		Y	1	1		Y	1	1		-				W	1	1		-				R	1	1		-				-				-				M	1	1
PL444/2017	LLR	3n	M	E	Rügen [DE]	R	1	1		Y	1	1		-				-				-				-				R	1	1		-				-				-				A	2	0
PL445/2017	LR	2n	F	E	Rügen [DE]	R	1	1		Y	1	1		Y	1	1		R	1	1		W	1	1		-				R	1	1		Y	1	1		C	2	0		Y	1	1		M	1	1
PL446/2017	LR	2n	M	E	Rügen [DE]	R	1	1		Y	1	1		T	0	2		-				A	2	0		-				R	1	1		-				C	2	0		Y	1	1		M	1	1
PL447/2017	LR	2n	M	E	Rügen [DE]	R	1	1		Y	1	1		T	0	2		-				A	2	0		-				R	1	1		C	2	0		-				-				M	1	1
PL448/2017	RRL	3n	F	E	Rügen [DE]	R	1	1		Y	1	1		Y	1	1		R	1	1		T	0	2		-				R	1	1		-				C	2	0		Y	1	1		M	1	1
PL449/2017	RRL	3n	F	E	Rügen [DE]	R	1	1		Y	1	1		Y	1	1		R	1	1		W	1	1		-				R	1	1		Y	1	1		C	2	0		Y	1	1		M	1	1
PL450/2017	LR	2n	F	E	Rügen [DE]	R	1	1		Y	1	1		Y	1	1		-				W	1	1		-				R	1	1		-				-				-				M	1	1
PL451/2017	RRL	3n	M	E	Rügen [DE]	R	1	1		Y	1	1		Y	1	1		-				W	1	1		-				R	1	1		-				-				-				M	1	1
PL452/2017	LR	2n	F	E	Rügen [DE]	R	1	1		Y	1	1		T	0	2		-				A	2	0		-				R	1	1		-				C	2	0		Y	1	1		M	1	1
PL45-2012	RR		M	R-E	Albrechtičky [CZ]	G	0	2		T	0	2		Y	1	1		-				W	1	1		-				A	2	0		-				C	2	0		C	2	0		C	0	2
PL453/2017	RRL	3n	M	E	Rügen [DE]	R	1	1		Y	1	1		Y	1	1		R	1	1		W	1	1		-				R	1	1		Y	1	1		-				-				M	1	1
PL454/2017	LR	2n	F	E	Rügen [DE]	R	1	1		Y	1	1		-				-				-				-				R	1	1		-				-				-				M	1	1
PL455/2017	LR	2n	F	E	Rügen [DE]	R	1	1		Y	1	1		Y	1	1		R	1	1		W	1	1		-				R	1	1		Y	1	1		C	2	0		Y	1	1		M	1	1
PL456/2017	RRL	3n	F	E	Rügen [DE]	R	1	1		Y	1	1		Y	1	1		R	1	1		W	1	1		R	1	1		R	1	1		Y	1	1		C	2	0		Y	1	1		M	1	1
PL457/2017	RRL	3n	M	E	Rügen [DE]	R	1	1		Y	1	1		Y	1	1		-				W	1	1		-				R	1	1		Y	1	1		C	2	0		Y	1	1		C	0	2
PL458/2017	LR	2n	juv	E	Rügen [DE]	R	1	1		Y	1	1		Y	1	1		R	1	1		W	1	1		-				R	1	1		-				-				-				M	1	1
PL459/2017	LLR	3n	M	E	Rügen [DE]	R	1	1		Y	1	1		Y	1	1		-				W	1	1		-				R	1	1		-				-				-				M	1	1
PL460/2017	RRL	3n	M	E	Rügen [DE]	R	1	1		Y	1	1		-				-				-				-				-				-				-				-				-
PL461/2017	RRL	3n	F	E	Rügen [DE]	R	1	1		Y	1	1		Y	1	1		-				W	1	1		-				R	1	1		-				C	2	0		Y	1	1		M	1	1
PL462/2017	RRL	3n	F	E	Rügen [DE]	R	1	1		Y	1	1		Y	1	1		-				W	1	1		-				R	1	1		-				-				-				M	1	1
PL46-2012	RR		M	R-E	Albrechtičky [CZ]	G	0	2		T	0	2		T	0	2		-				A	2	0		-				A	2	0		-				-				-				C	0	2
PL463/2017	LLR	3n	M	E	Rügen [DE]	R	1	1		Y	1	1		Y	1	1		-				W	1	1		-				R	1	1		Y	1	1		C	2	0		Y	1	1		M	1	1
PL464/2017	LLR	3n	M	E	Rügen [DE]	R	1	1		Y	1	1		T	0	2		-				A	2	0		-				R	1	1		-				C	2	0		Y	1	1		M	1	1
PL465/2017	LLR	3n	M	E	Rügen [DE]	A	2	0		C	2	0		Y	1	1		R	1	1		W	1	1		-				R	1	1		-				C	2	0		Y	1	1		M	1	1
PL466/2017	LLR	3n	F	E	Rügen [DE]	A	2	0		C	2	0		Y	1	1		R	1	1		W	1	1		-				R	1	1		C	2	0		C	2	0		Y	1	1		M	1	1
PL467/2017	LR	2n	F	E	Rügen [DE]	R	1	1		Y	1	1		T	0	2		-				A	2	0		-				R	1	1		-				C	2	0		Y	1	1		M	1	1
PL468/2017	LLR	3n	M	E	Rügen [DE]	A	2	0		C	2	0		Y	1	1		-				A	2	0		-				R	1	1		Y	1	1		C	2	0		Y	1	1		M	1	1
PL469/2017	LLR	3n	juv	E	Rügen [DE]	R	1	1		Y	1	1		T	0	2		-				A	2	0		-				R	1	1		-				C	2	0		Y	1	1		M	1	1
PL470/2017	LLR	3n	juv	E	Rügen [DE]	R	1	1		Y	1	1		T	0	2		-				A	2	0		-				R	1	1		-				C	2	0		Y	1	1		A	2	0
PL471/2017	LLR	3n	M	E	Rügen [DE]	R	1	1		Y	1	1		T	0	2		A	2	0		A	2	0		-				R	1	1		Y	1	1		C	2	0		T	0	2		M	1	1
PL472/2017	LLR	3n	M	E	Rügen [DE]	R	1	1		Y	1	1		T	0	2		A	2	0		A	2	0		-				R	1	1		Y	1	1		C	2	0		Y	1	1		M	1	1
PL47-2012	RR		M	R-E	Albrechtičky [CZ]	G	0	2		T	0	2		T	0	2		-				A	2	0		-				A	2	0		T	0	2		Y	1	1		C	2	0		C	0	2
PL473/2017	LR	2n	F	E	Rügen [DE]	A	2	0		C	2	0		Y	1	1		R	1	1		W	1	1		-				R	1	1		C	2	0		C	2	0		Y	1	1		M	1	1
PL474/2017	LLR	3n	M	E	Rügen [DE]	R	1	1		Y	1	1		T	0	2		-				-				-				R	1	1		-				-				-				M	1	1
PL475/2017	LL		juv	E	Rügen [DE]	A	2	0		C	2	0		T	0	2		-				A	2	0		-				G	0	2		-				-				-				A	2	0
PL476/2017	LR	2n	F	E	Rügen [DE]	R	1	1		Y	1	1		T	0	2		-				A	2	0		-				R	1	1		Y	1	1		-				-				M	1	1
PL477/2017	LLR	3n	M	E	Rügen [DE]	A	2	0		C	2	0		Y	1	1		R	1	1		W	1	1		-				R	1	1		C	2	0		C	2	0		Y	1	1		M	1	1
PL478/2017	LR	2n	juv	E	Rügen [DE]	A	2	0		C	2	0		Y	1	1		-				W	1	1		-				R	1	1		-				-				-				M	1	1
PL479/2017	LLR	3n	M	E	Rügen [DE]	R	1	1		Y	1	1		Y	1	1		-				W	1	1		-				R	1	1		-				C	2	0		Y	1	1		M	1	1
PL480/2017	LLR	3n	M	E	Rügen [DE]	R	1	1		Y	1	1		Y	1	1		R	1	1		W	1	1		-				R	1	1		-				-				-				M	1	1
PL481/2017	LLR	3n	M	E	Rügen [DE]	R	1	1		Y	1	1		T	0	2		A	2	0		A	2	0		-				R	1	1		-				C	2	0		T	0	2		M	1	1
PL482/2017	LLR	3n	M	E	Rügen [DE]	R	1	1		Y	1	1		T	0	2		-				-				-				R	1	1		-				-				-				M	1	1
PL48-2012	RR		F	R-E	Lebus [DE]	-				-				-				-				-				-				-				-				-				-				-
PL483/2017	LLR	3n	M	E	Rügen [DE]	R	1	1		Y	1	1		T	0	2		-				A	2	0		-				R	1	1		-				C	2	0		Y	1	1		M	1	1
PL484/2017	LLR	3n	M	E	Rügen [DE]	R	1	1		Y	1	1		T	0	2		-				A	2	0		-				R	1	1		-				C	2	0		Y	1	1		M	1	1
PL485/2017	LLR	3n	M	E	Rügen [DE]	A	2	0		C	2	0		T	0	2		A	2	0		A	2	0		R	1	1		R	1	1		C	2	0		C	2	0		Y	1	1		M	1	1
PL486/2017	LLR	3n	M	E	Rügen [DE]	R	1	1		Y	1	1		T	0	2		-				A	2	0		-				R	1	1		-				C	2	0		Y	1	1		M	1	1
PL487/2017	LLR	3n	M	E	Rügen [DE]	R	1	1		Y	1	1		T	0	2		-				-				-				R	1	1		-				-				-				M	1	1
PL488/2017	LLR	3n	M	E	Rügen [DE]	R	1	1		Y	1	1		T	0	2		-				A	2	0		-				R	1	1		-				-				-				M	1	1
PL489/2017	LLR	3n	M	E	Rügen [DE]	R	1	1		Y	1	1		T	0	2		-				A	2	0		-				R	1	1		C	2	0		-				-				M	1	1
PL490/2017	LLR	3n	M	E	Rügen [DE]	R	1	1		Y	1	1		T	0	2		-				A	2	0		-				R	1	1		-				C	2	0		Y	1	1		M	1	1
PL491/2017	LLR	3n	M	E	Rügen [DE]	R	1	1		Y	1	1		T	0	2		-				A	2	0		-				R	1	1		-				-				-				M	1	1
PL492/2017	LLR	3n	M	E	Rügen [DE]	R	1	1		Y	1	1		T	0	2		-				A	2	0		-				R	1	1		Y	1	1		C	2	0		Y	1	1		M	1	1
PL493/2017	LLR	3n	F	E	Rügen [DE]	R	1	1		Y	1	1		T	0	2		-				A	2	0		-				R	1	1		-				-				-				M	1	1
PL494/2017	LLR	3n	M	E	Rügen [DE]	R	1	1		Y	1	1		T	0	2		-				A	2	0		-				R	1	1		-				C	2	0		Y	1	1		M	1	1
PL495/2017	LLR	3n	M	E	Rügen [DE]	R	1	1		Y	1	1		T	0	2		-				A	2	0		-				R	1	1		C	2	0		C	2	0		Y	1	1		M	1	1
PL496/2017	LLR	3n	M	E	Rügen [DE]	R	1	1		Y	1	1		T	0	2		A	2	0		A	2	0		-				R	1	1		C	2	0		C	2	0		Y	1	1		M	1	1
PL497/2017	LLR	3n	F	E	Rügen [DE]	R	1	1		Y	1	1		T	0	2		A	2	0		A	2	0		-				R	1	1		Y	1	1		C	2	0		Y	1	1		M	1	1
PL498/2017	LLR	3n	F	E	Rügen [DE]	R	1	1		Y	1	1		T	0	2		A	2	0		A	2	0		-				R	1	1		Y	1	1		C	2	0		Y	1	1		M	1	1
PL499/2017	LLR	3n	M	E	Rügen [DE]	R	1	1		Y	1	1		T	0	2		-				A	2	0		-				R	1	1		-				-				-				M	1	1
PL500/2017	LLR	3n	M	E	Rügen [DE]	R	1	1		Y	1	1		T	0	2		-				A	2	0		-				R	1	1		-				-				-				M	1	1
PL501/2017	LLR	3n	M	E	Rügen [DE]	R	1	1		Y	1	1		T	0	2		-				-				-				R	1	1		-				-				-				M	1	1
PL502/2017	LLR	3n	F	E	Rügen [DE]	R	1	1		Y	1	1		T	0	2		-				A	2	0		-				R	1	1		-				C	2	0		Y	1	1		M	1	1
PL503/2017	LR	2n	F	E	Fehmarn [DE]	R	1	1		Y	1	1		T	0	2		-				A	2	0		-				R	1	1		-				-				-				M	1	1
PL504/2017	LLR	3n	F	E	Fehmarn [DE]	R	1	1		Y	1	1		T	0	2		-				A	2	0		-				R	1	1		-				C	2	0		Y	1	1		M	1	1
PL505/2017	LR	2n	M	E	Fehmarn [DE]	R	1	1		Y	1	1		Y	1	1		-				-				-				R	1	1		-				-				-				M	1	1
PL506/2017	LLR	3n	F	E	Fehmarn [DE]	R	1	1		Y	1	1		T	0	2		-				-				-				G	0	2		-				-				-				-
PL507/2017	LR	2n	M	E	Fehmarn [DE]	R	1	1		Y	1	1		-				-				A	2	0		-				R	1	1		-				-				-				M	1	1
PL508/2017	LLR	3n	M	E	Fehmarn [DE]	R	1	1		Y	1	1		T	0	2		-				A	2	0		-				R	1	1		-				C	2	0		-				A	2	0
PL509/2017	LR	?	M	E	Fehmarn [DE]	R	1	1		Y	1	1		Y	1	1		-				-				-				R	1	1		-				-				-				M	1	1
PL510/2017	LR	2n	M	E	Fehmarn [DE]	R	1	1		Y	1	1		T	0	2		-				A	2	0		-				R	1	1		-				-				-				M	1	1
PL511/2017	LLR	3n	M	E	Fehmarn [DE]	R	1	1		Y	1	1		T	0	2		-				A	2	0		-				R	1	1		-				-				-				M	1	1
PL512/2017	LR	2n	M	E	Fehmarn [DE]	R	1	1		Y	1	1		Y	1	1		-				W	1	1		-				R	1	1		Y	1	1		-				-				M	1	1
PL513/2017	LLR	3n	F	E	Fehmarn [DE]	R	1	1		Y	1	1		T	0	2		-				A	2	0		-				R	1	1		-				-				-				M	1	1
PL514/2017	LR	2n	M	E	Fehmarn [DE]	R	1	1		Y	1	1		T	0	2		-				A	2	0		-				R	1	1		-				-				-				M	1	1
PL515/2017	LLR	3n	juv	E	Fehmarn [DE]	R	1	1		Y	1	1		-				-				A	2	0		-				R	1	1		-				-				-				A	2	0
PL516/2017	LLR	3n	juv	E	Fehmarn [DE]	R	1	1		Y	1	1		T	0	2		-				A	2	0		-				R	1	1		-				-				-				M	1	1
PL517/2017	LLR	3n	F	E	Fehmarn [DE]	R	1	1		Y	1	1		T	0	2		-				A	2	0		-				R	1	1		-				C	2	0		T	0	2		M	1	1
PL518/2017	LR	?	F	E	Fehmarn [DE]	R	1	1		Y	1	1		T	0	2		-				-				-				R	1	1		-				-				-				M	1	1
PL519/2017	LR	2n	F	E	Fehmarn [DE]	R	1	1		Y	1	1		Y	1	1		R	1	1		W	1	1		-				R	1	1		Y	1	1		C	2	0		Y	1	1		M	1	1
PL520/2017	LLR	3n	M	E	Fehmarn [DE]	R	1	1		Y	1	1		Y	1	1		-				W	1	1		-				R	1	1		-				-				-				M	1	1
PL521/2017	LR	2n	F	E	Fehmarn [DE]	R	1	1		Y	1	1		T	0	2		-				A	2	0		-				R	1	1		-				C	2	0		Y	1	1		M	1	1
PL522/2017	LLR	3n	M	E	Fehmarn [DE]	R	1	1		Y	1	1		Y	1	1		-				W	1	1		-				R	1	1		Y	1	1		-				-				M	1	1
PL523/2017	LR	2n	M	E	Fehmarn [DE]	R	1	1		Y	1	1		-				-				-				-				R	1	1		-				-				-				-
PL524/2017	LR	2n	F	E	Fehmarn [DE]	R	1	1		Y	1	1		T	0	2		-				A	2	0		-				R	1	1		Y	1	1		-				-				M	1	1
PL525/2017	LR	2n	F	E	Fehmarn [DE]	R	1	1		Y	1	1		T	0	2		-				A	2	0		-				R	1	1		Y	1	1		C	2	0		Y	1	1		M	1	1
PL55-2012	LL		F	L-E	Melzower Forst [DE]	-				-				-				-				-				-				-				-				-				-				-
PL56-2012	LL		F	L-E	Melzower Forst [DE]	-				-				-				-				-				-				-				-				-				-				-
PL57-2012	LL		F	L-E	Melzower Forst [DE]	A	2	0		C	2	0		-				-				-				-				-				-				-				-				-
PL58-2012	LL		F	L-E	Melzower Forst [DE]	-				-				-				-				-				-				-				-				-				-				-
PL59-2012	LL		F	L-E	Melzower Forst [DE]	A	2	0		C	2	0		T	0	2		-				A	2	0		-				G	0	2		-				-				-				A	2	0
PL60-2012	LL		F	L-E	Melzower Forst [DE]	-				-				-				-				-				-				-				-				-				-				-
PL61-2012	LL		F	L-E	Melzower Forst [DE]	A	2	0		C	2	0		-				-				-				-				-				-				-				-				-
PL62-2012	LL		F	L-E	Melzower Forst [DE]	A	2	0		C	2	0		-				-				-				-				G	0	2		-				-				-				-
PL63-2012	LL		F	L-E	Melzower Forst [DE]	-				-				-				-				-				-				-				-				-				-				-
PL64-2012	LLR	?	F	L-E	Melzower Forst [DE]	R	1	1		Y	1	1		-				-				-				-				R	1	1		-				-				-				-
PL65-2012	LL		F	L-E	Melzower Forst [DE]	A	2	0		C	2	0		-				-				-				-				-				-				-				-				-
PL67-2012	LL		F	L-E	Melzower Forst [DE]	A	2	0		C	2	0		-				-				-				-				-				-				-				-				-
PL68-2012	LL		M	L-E	Melzower Forst [DE]	A	2	0		C	2	0		-				-				-				-				-				-				-				-				-
PL69-2012	LL		M	L-E	Melzower Forst [DE]	A	2	0		C	2	0		-				-				-				-				-				-				-				-				-
PL70-2012	LL		M	L-E	Melzower Forst [DE]	A	2	0		C	2	0		-				-				-				-				-				-				-				-				-
PL71-2012	LL		M	L-E	Melzower Forst [DE]	A	2	0		C	2	0		-				-				-				-				G	0	2		-				-				-				-
PL72-2012	LL		M	L-E	Melzower Forst [DE]	-				-				-				-				-				-				-				-				-				-				-
PL73-2012	LL		M	L-E	Melzower Forst [DE]	-				-				-				-				-				-				-				-				-				-				-
PL74-2012	LL		M	L-E	Melzower Forst [DE]	-				-				-				-				-				-				-				-				-				-				-
PL75-2012	LL		M	L-E	Melzower Forst [DE]	A	2	0		C	2	0		-				-				-				-				G	0	2		-				-				-				A	2	0
PL76-2012	LL		M	L-E	Melzower Forst [DE]	A	2	0		C	2	0		-				-				-				-				-				-				-				-				-
PL77-2012	LL		M	L-E	Melzower Forst [DE]	A	2	0		C	2	0		-				-				-				-				-				-				-				-				-
PL78-2012	LL		F	L-E	Melzower Forst [DE]	-				-				-				-				-				-				-				-				-				-				-
PL79-2012	RR		M	R-E	Lebus [DE]	G	0	2		T	0	2		T	0	2		-				A	2	0		-				A	2	0		T	0	2		C	2	0		C	2	0		C	0	2
PL80-2012	RR		M	R-E	Lebus [DE]	R	1	1		Y	1	1		Y	1	1		-				-				-				A	2	0		-				-				-				C	0	2
PL81-2012	RR		M	R-E	Lebus [DE]	G	0	2		T	0	2		T	0	2		-				A	2	0		-				A	2	0		-				-				-				C	0	2
PL82-2012	RR		M	R-E	Lebus [DE]	G	0	2		T	0	2		-				-				-				-				A	2	0		-				-				-				-
PL83-2012	RR		M	R-E	Lebus [DE]	G	0	2		T	0	2		T	0	2		-				-				-				A	2	0		-				-				-				C	0	2
PL84-2012	RR		M	R-E	Lebus [DE]	G	0	2		T	0	2		-				-				-				-				-				-				-				-				-
PL85-2012	RR		M	R-E	Lebus [DE]	G	0	2		T	0	2		-				-				-				-				A	2	0		-				-				-				-
PL86-2012	RR		M	R-E	Lebus [DE]	G	0	2		T	0	2		T	0	2		-				-				-				A	2	0		-				-				-				C	0	2
PL87-2013	RR		M	R-E	Lebus [DE]	G	0	2		T	0	2		-				-				-				-				-				-				-				-				-
PL88-2013	RR		M	R-E	Lebus [DE]	G	0	2		T	0	2		-				-				-				-				-				-				-				-				-
PL89-2013	RR		M	R-E	Lebus [DE]	R	1	1		Y	1	1		-				-				-				-				-				-				-				-				-
PL90-2013	RR		M	R-E	Lebus [DE]	-				-				-				-				-				-				-				-				-				-				-
PL91-2013	RR		M	R-E	Lebus [DE]	G	0	2		T	0	2		-				-				-				-				A	2	0		-				-				-				C	0	2
PL92-2013	RR		M	R-E	Lebus [DE]	G	0	2		T	0	2		C	2	0		-				-				-				A	2	0		-				-				-				-
PL93-2013	RR		M	R-E	Lebus [DE]	G	0	2		T	0	2		-				-				-				-				A	2	0		-				-				-				-
PL94-2013	RR		M	R-E	Lebus [DE]	G	0	2		T	0	2		-				-				-				-				-				-				-				-				-
PL95-2013	LR	?	M	R-E	Lebus [DE]	R	1	1		Y	1	1		-				-				-				-				-				-				-				-				-
PL96-2013	LR	?	M	R-E	Lebus [DE]	R	1	1		Y	1	1		-				-				-				-				-				-				-				-				-
PL97-2013	RR		F	R	Cítov, okres Mělník [CZ]	-				-				-				-				-				-				-				-				-				-				-
PL98-2013	RR		F	R-E	Košatka, okres Jistebník [CZ]	G	0	2		T	0	2		-				-				-				-				-				-				-				-				-
R_223	RR		M	R	Oltenița [RO]	G	0	2		T	0	2		T	0	2		-				-				G	0	2		A	2	0		-				Y	1	1		C	2	0		C	0	2
R_224	RR		F	R	Oltenița [RO]	G	0	2		T	0	2		T	0	2		A	2	0		A	2	0		-				A	2	0		-				C	2	0		C	2	0		C	0	2
R_225	RR		M	R	Oltenița [RO]	G	0	2		T	0	2		-				-				-				-				A	2	0		-				-				-				-
R_226	RR		M	R	Oltenița [RO]	G	0	2		T	0	2		T	0	2		-				A	2	0		-				A	2	0		-				T	0	2		C	2	0		C	0	2
R_227	RR		?	R	Oltenița [RO]	G	0	2		T	0	2		T	0	2		-				A	2	0		G	0	2		A	2	0		T	0	2		Y	1	1		C	2	0		C	0	2
R_228	RR		?	R	Oltenița [RO]	G	0	2		T	0	2		T	0	2		-				A	2	0		-				A	2	0		T	0	2		Y	1	1		C	2	0		C	0	2
R_229	RR		?	R	Oltenița [RO]	G	0	2		T	0	2		T	0	2		-				A	2	0		-				A	2	0		-				C	2	0		C	2	0		C	0	2
R_230	RR		?	R	Oltenița [RO]	G	0	2		T	0	2		Y	1	1		-				W	1	1		-				A	2	0		Y	1	1		Y	1	1		C	2	0		C	0	2
R_231	RR		M	R	Oltenița [RO]	G	0	2		T	0	2		Y	1	1		R	1	1		-				-				A	2	0		-				-				-				C	0	2
T_200	LR	2n	F	L-E	Trnávka [CZ]	R	1	1		Y	1	1		-				-				-				-				R	1	1		-				-				-				-
T_201	LR	2n	F	L-E	Trnávka [CZ]	R	1	1		Y	1	1		Y	1	1		R	1	1		W	1	1		R	1	1		R	1	1		Y	1	1		C	2	0		Y	1	1		M	1	1
T_202	LL		F	L-E	Trnávka [CZ]	A	2	0		C	2	0		T	0	2		A	2	0		A	2	0		A	2	0		G	0	2		C	2	0		C	2	0		T	0	2		A	2	0
T_203	LL		F	L-E	Trnávka [CZ]	A	2	0		C	2	0		T	0	2		A	2	0		A	2	0		A	2	0		G	0	2		C	2	0		C	2	0		T	0	2		A	2	0
T_204	LL		F	L-E	Trnávka [CZ]	A	2	0		C	2	0		T	0	2		A	2	0		A	2	0		A	2	0		G	0	2		C	2	0		C	2	0		T	0	2		A	2	0
T_205	LR	2n	F	L-E	Trnávka [CZ]	R	1	1		Y	1	1		Y	1	1		R	1	1		W	1	1		-				R	1	1		Y	1	1		C	2	0		Y	1	1		M	1	1
T_206	LR	2n	F	L-E	Trnávka [CZ]	R	1	1		Y	1	1		Y	1	1		-				W	1	1		-				R	1	1		Y	1	1		C	2	0		Y	1	1		M	1	1
T_207	LL		M	L-E	Trnávka [CZ]	A	2	0		C	2	0		T	0	2		A	2	0		A	2	0		A	2	0		G	0	2		C	2	0		C	2	0		T	0	2		A	2	0
T_208	LL		F	L-E	Trnávka [CZ]	A	2	0		C	2	0		T	0	2		-				A	2	0		-				G	0	2		C	2	0		C	2	0		T	0	2		A	2	0
T_209	LL		M	L-E	Trnávka [CZ]	A	2	0		C	2	0		T	0	2		A	2	0		A	2	0		A	2	0		G	0	2		C	2	0		C	2	0		T	0	2		A	2	0
T_210	LL		F	L-E	Trnávka [CZ]	A	2	0		C	2	0		T	0	2		A	2	0		A	2	0		A	2	0		G	0	2		C	2	0		C	2	0		T	0	2		A	2	0
T_211	LL		M	L-E	Trnávka [CZ]	A	2	0		C	2	0		-				-				-				-				G	0	2		-				-				-				A	2	0
T_212	LL		M	L-E	Trnávka [CZ]	A	2	0		C	2	0		T	0	2		A	2	0		A	2	0		A	2	0		G	0	2		C	2	0		C	2	0		T	0	2		A	2	0
T_213	LL		M	L-E	Trnávka [CZ]	A	2	0		C	2	0		T	0	2		A	2	0		A	2	0		A	2	0		G	0	2		C	2	0		C	2	0		T	0	2		A	2	0
T_214	LL		M	L-E	Trnávka [CZ]	A	2	0		C	2	0		T	0	2		A	2	0		A	2	0		A	2	0		G	0	2		C	2	0		C	2	0		T	0	2		A	2	0
W_122	LR	2n	F	E	Wysoka Kamieńska [PL]	R	1	1		Y	1	1		T	0	2		-				A	2	0		-				R	1	1		-				C	2	0		Y	1	1		M	1	1
W_123	LR	2n	?	E	Jarzębowo, Wolin [PL]	R	1	1		Y	1	1		T	0	2		-				A	2	0		R	1	1		R	1	1		Y	1	1		C	2	0		Y	1	1		M	1	1
W_124	LR	2n	M	E	Jarzębowo, Wolin [PL]	R	1	1		Y	1	1		T	0	2		A	2	0		A	2	0		R	1	1		R	1	1		Y	1	1		C	2	0		Y	1	1		M	1	1
W_125	LR	2n	M	E	Jarzębowo, Wolin [PL]	A	2	0		C	2	0		T	0	2		A	2	0		A	2	0		-				R	1	1		Y	1	1		Y	1	1		Y	1	1		M	1	1
W_126	LR	2n	M	E	Jarzębowo, Wolin [PL]	R	1	1		Y	1	1		T	0	2		A	2	0		A	2	0		-				R	1	1		Y	1	1		Y	1	1		Y	1	1		M	1	1
W_127	LR	2n	M	E	Jarzębowo, Wolin [PL]	R	1	1		Y	1	1		-				-				-				-				R	1	1		-				-				-				M	1	1
W_128	RRL	3n	juv	E	Wysoka Kamieńska [PL]	R	1	1		Y	1	1		Y	1	1		R	1	1		W	1	1		-				R	1	1		Y	1	1		C	2	0		Y	1	1		M	1	1
Z_32	RR		F	R	Želechovice, okres Olomouc [CZ]	G	0	2		T	0	2		T	0	2		-				A	2	0		G	0	2		A	2	0		T	0	2		C	2	0		C	2	0		C	0	2
Z_33	RR		F	R	Želechovice, okres Olomouc [CZ]	G	0	2		T	0	2		T	0	2		-				A	2	0		-				A	2	0		-				C	2	0		C	2	0		C	0	2
Z_34	RR		F	R	Želechovice, okres Olomouc [CZ]	G	0	2		T	0	2		Y	1	1		-				W	1	1		G	0	2		A	2	0		T	0	2		C	2	0		C	2	0		C	0	2
Z_35	RR		F	R	Želechovice, okres Olomouc [CZ]	G	0	2		T	0	2		Y	1	1		R	1	1		W	1	1		G	0	2		A	2	0		T	0	2		Y	1	1		C	2	0		C	0	2
Z_36	RR		F	R	Želechovice, okres Olomouc [CZ]	G	0	2		T	0	2		T	0	2		-				A	2	0		-				A	2	0		T	0	2		C	2	0		C	2	0		C	0	2
Z_37	RR		F	R	Želechovice, okres Olomouc [CZ]	G	0	2		T	0	2		-				-				-				-				A	2	0		-				-				-				-
Z_38	RR		F	R	Želechovice, okres Olomouc [CZ]	G	0	2		T	0	2		Y	1	1		-				-				-				A	2	0		-				-				-				C	0	2
Z_39	RR		F	R	Želechovice, okres Olomouc [CZ]	G	0	2		T	0	2		T	0	2		-				-				-				A	2	0		-				-				-				C	0	2
Z_40	RR		F	R	Želechovice, okres Olomouc [CZ]	G	0	2		T	0	2		T	0	2		-				A	2	0		G	0	2		A	2	0		-				C	2	0		C	2	0		C	0	2
Z_41	RR		F	R	Želechovice, okres Olomouc [CZ]	G	0	2		T	0	2		T	0	2		-				A	2	0		G	0	2		A	2	0		T	0	2		C	2	0		C	2	0		C	0	2
Z_42	RR		M	R	Želechovice, okres Olomouc [CZ]	G	0	2		T	0	2		T	0	2		A	2	0		A	2	0		G	0	2		A	2	0		T	0	2		Y	1	1		C	2	0		C	0	2
Z_43	RR		M	R	Želechovice, okres Olomouc [CZ]	G	0	2		T	0	2		T	0	2		-				A	2	0		G	0	2		A	2	0		T	0	2		C	2	0		C	2	0		C	0	2
Z_44	RR		M	R	Želechovice, okres Olomouc [CZ]	G	0	2		T	0	2		T	0	2		A	2	0		A	2	0		G	0	2		A	2	0		T	0	2		C	2	0		C	2	0		C	0	2
Z_45	RR		M	R	Želechovice, okres Olomouc [CZ]	G	0	2		T	0	2		T	0	2		-				A	2	0		-				A	2	0		T	0	2		C	2	0		C	2	0		C	0	2
Z_46	RR		M	R	Želechovice, okres Olomouc [CZ]	G	0	2		T	0	2		Y	1	1		-				-				-				A	2	0		-				-				-				-
Z_47	RR		M	R	Želechovice, okres Olomouc [CZ]	G	0	2		T	0	2		T	0	2		-				A	2	0		-				A	2	0		T	0	2		C	2	0		C	2	0		C	0	2
Z_48	RR		M	R	Želechovice, okres Olomouc [CZ]	G	0	2		T	0	2		T	0	2		-				A	2	0		G	0	2		A	2	0		T	0	2		C	2	0		C	2	0		C	0	2
Z_49	RR		M	R	Želechovice, okres Olomouc [CZ]	G	0	2		T	0	2		T	0	2		-				-				-				A	2	0		-				-				-				C	0	2
Z_50	RR		M	R	Želechovice, okres Olomouc [CZ]	G	0	2		T	0	2		Y	1	1		-				-				-				A	2	0		-				-				-				-
Z_51	RR		M	R	Želechovice, okres Olomouc [CZ]	G	0	2		T	0	2		T	0	2		-				A	2	0		-				A	2	0		-				-				-				C	0	2
[truncated: 485 more columns]
