# Supplementary material for: New insights into the molecular basis of gametogenesis in the hybridogenetic water frog Pelophylax esculentus
Source: Research Square preprint supplement (doi:10.21203/rs.3.rs-6224694/v1), 2025-05-07
Supplement: Supplementary file 3 [file b32cb46bf0132b56de383d81.xlsx]

## Sheet: Tabelle2
LL (L-E system)			RR (all-R)			RR (R-E system)			LR (L-E system)			LR (R-E system)			LR (all-hybrid)
Bara Grubisno			Bulgaria			Albrechticky (CZ)			Bara Grubisno			Dolni Benesov (CZ)			Jarzebowo
1 x	GAAACGCRCCGACG		4 MLGs			5 MLGs			5 MLGs			6 MLGs			2 MLGs
			1 x	GGGGCACGCCGATR		1 x	GRSRCRCGCYGRTR		2 x	KRSRCRCGCCGRYG		3 x	KGGGCAYRYYGRYG		2 x	KGSRYRTRYTGAYG
Cesky Tesin (CZ)			1 x	GGGGCACGCCGATA		1 x	GRSRCRCGCCGRTR		1 x	GRRRCRCRCCGRYG		2 x	KGGGCAYRYTGRYG		1 x	KGGGCATRYTGAYG
6 MLGs			1 x	GGSGCACGCCGATR		1 x	GGSRYRCGCYGATR		1 x	GRSRCRYRCYGRYR		1 x	KRSRCRYRYYKACG
2 x	KACACGYRYCGACG		1 x	GGGGCACGCCGATG		1 x	GGGGCACGCCGRTA		1 x	KRSRCRCGYCGRYR		1 x	KGGGCAYRYYKRCG		Wysoka
1 x	TACACGYRYCGACG					1 x	GGGGCACGCYGGTA		1 x	GGCAYGYRCYKRYG		1 x	KRSRCRTRYTGAYG		3 MLGs
1 x	TACACGCACCGACG		Citov (CZ)									1 x	KRSRCRYRYTGRYR		2 x	KGSRYRCRYTGAYG
1 x	TACACGYRCCGACG		31 MLGs			Dolni Benesov (CZ)			Cesky Tesin (CZ)						1 x	KGGGCAYRYTGAYG
1 x	KACACGTACCGACG		4 x	GGGGCAYGCYGGTR		10 MLGs			5 MLGs			Kosatka (CZ)			1 x	KGGGCAYRYYGAYG
1 x	KACACGYRCCGACG		2 x	GGGGCACGCYGGTR		1 x	GGGGCACGCYGGTR		1 x	GRSRCRYGYYGRYR		12 MLGs
			1 x	GGSRYRCGCCGGTR		1 x	GGGGCAYGCCGGTG		1 x	GRSRCRCRCCGRYG		2 x	KGSRYRYRYTGAYG		Pedersker
Trnavka (CZ)			1 x	GGGGCACGCYGGYR		1 x	GGGGCAYGCYGATG		1 x	KRSRCRCGCYGRYR		1 x	KGSRYRYRYYKRCR		1 MLG
10 MLGs			1 x	GGGGCAYGCYKGTR		1 x	GRSRCRCGCTKRTR		1 x	KRSRCRYGYCGRYG		1 x	KGGGCATRYTKRYG		2 x	KGGGCAYRYTGAYG
2 x	TACACGYRYCGACG		1 x	GGGGCACGCYKGTG		1 x	GGGGCAYGCYGGTR		1 x	GRSRCRCRCYGRYG		1 x	KGGGCATRYYGAYG
1 x	TACACGYRCCGACG		1 x	GGGGCAYGCYKGYA		1 x	GGSRYRCGCCGGTG					1 x	KGGGCAYRYYGRYG		Rügen (DE)
1 x	TACACGYACCGACG		1 x	GGGGCAYGCYGGTG		1 x	GGGGCACGCTGATG		Trnavka (CZ)			1 x	KGGGCAYRYTGAYG		3 MLGs
1 x	KACACGYAYCGACG		1 x	GGSRYRCGCCKGTR		1 x	GRSRCRYGCYGRTG		3 MLGs			1 x	KGGGCATRYYGAYR		2 x	KGSRYRYRYTGAYG
1 x	TACACGCATCGACG		1 x	GGGGCATGCCGGTR		1 x	GGGGCACGCYGGTG		1 x	KRSRCRYRCYGRYR		1 x	KGGGCAYRYYGAYR		1 x	KGSRYRYRCTGAYG
1 x	TACACGYAYCGACG		1 x	GGSRYRCGCTGGTG		1 x	GGSRYRCGCYGGTG		1 x	KRSRCRCRCYGRYR		1 x	KGGGCAYRYTKRYG		1 x	KRCAYGYRYTGAYG
1 x	TACACGTACCGACG		1 x	GGGGCAYGCCGRTA					1 x	GRSRCRCRYYGRYR		1 x	KGSRYRTRYTGRYG
1 x	KACACGTRYCGACG		1 x	GGGGCACGCYGGYG		Kosatka (CZ)						1 x	KRSRCRYRYYGAYR		Usedom (DE)
1 x	TACACGYATCGACG		1 x	GGGGCACGCYGGYA		17 MLGs						1 x	KGGGCAYRYTGRYG		1 MLG
1 x	TACACGTGYCGACG		1 x	GGSRYRCGCTGGTA		1 x	GGGGCACGCCGRTG								1 x	KGSRYRYRYTGAYG
			1 x	GGSRYRTGCYGRTG		1 x	GGGGCACGCYKRTR					Karsibor (CZ)
			1 x	GRCAYGCGCTKGTR		1 x	GGGGCACGCTGRTR					2 MLGs
			1 x	GGGGCAYGCTKGTG		1 x	GRSRCRYGCYKGTR					5 x	KGGGCAYRYTGAYG
			1 x	GGGGCACGCTKRTG		1 x	GGSRYRCGCYGGTG					1 x	KGSRYRYRYTKAYG
			1 x	GGGGCACGCTKGYG		1 x	GGSRYRCGCTKRTR
			1 x	GGGGCACGCTGGTR		1 x	GRSRCRCGCTGRTG					Lebus (DE)
			1 x	GGGGCAYGCTGRTR		1 x	GGGGCACGCYGRTR					3 MLGs
			1 x	GGGGCACGCTKGTR		1 x	GGGGCAYGCCGGTR					3 x	KGGGCAYRYTGAYG
			1 x	GGGGCACGCTKRYG		1 x	GGGGCACGCCGRTA					1 x	KGGGCAYRYTGRYG
			1 x	GGSRYRCGCCGGTG		1 x	GGGGCAYGCCGRTR					1 x	KGSRYRYRYTGACG
			1 x	GGSRYRYGCYKGTA		1 x	GRSRCRCGCYGRTR
			1 x	GGSRYRYGCTKRTA		1 x	GGGGCAYGCTKRTR
			1 x	GGSRYRYGCYKGTR		1 x	GGGGCACGCYKRTG
			1 x	GGSRYRYGCTGGTR		1 x	GGSRYRCGCTGRTR
			1 x	GGGGCACGCYGRTR		1 x	GGGGCAYGCTGATG
			1 x	GGSRYRCGCTKGYG		1 x	GGGGCAYGCCTGTR
			Kapuvar			Karsibor (CZ)
			9 MLGs			5 MLGs
			1 x	GRSRCRCGCCGRTR		3 x	GGSRYRCGCTGATG
			1 x	GRSRCRCGCTGRTG		2 x	GGGGCACGCTGATG
			1 x	GGGGCACGCYGRTG		1 x	GGGGCAYGCTKATG
			1 x	GGGGCACGCCKRTG		1 x	GGGGCACGCTGRTG
			1 x	GGSRYRCGCCKATA		1 x	GGGGCAYGCTGRTG
			1 x	GGGGCACGCYGATG
			1 x	GGSRYRCGCYKRTR		Lebus (DE)
			1 x	GGGGCACGCCGRTG		7 MLGs
			1 x	GGGGCACGCCKATR		3 x	GGSRYRCGCTGATG
						3 x	GGGGCACGCTGATG
			Oltenita (Romania)			2 x	GGGGCACGCTGRTG
			8 MLGs			1 x	GGSRYRYGCTGATG
			1 x	GRCAYGCGCCKRTG		1 x	GGSRYRYGCTGRTG
			1 x	GGCATGCGCCGRTG		1 x	GGGGCATGCTGATG
			1 x	GGCATGYGCYGRTA		1 x	GGSRYRYGYTGATG
			1 x	GGCATGCGCCGGTR
			1 x	GGCATGYGCCGRTG
			1 x	GGCATGYGCCGGTG
			1 x	GGSRYRCGCCGGTG
			1 x	GGSRYRCGCCKRTR
			Zelechovice
			14 MLGs
			1 x	GACACGCGCTGRTR
			1 x	GGGGCACGCYGRTR
			1 x	GGSRYRYGCCGATA
			1 x	GGSRYRCGCCGGTR
			1 x	GGGGCACGCCKGTR
			1 x	GGSRYRCGCTKGTR
			1 x	GGSRYRCGCCGRTR
			1 x	GGGGCACGCCKGTG
			1 x	GGSRYRCGCCTGTR
			1 x	GGGGCAYGCYKGTR
			1 x	GGSRYRCGCYTRTR
			1 x	GGGGCAYGCCKGTA
			1 x	GGGGCACGCTGGTG
			1 x	GGSRYRCGCCKGTR
