# Supplementary material for: New insights into the molecular basis of gametogenesis in the hybridogenetic water frog Pelophylax esculentus
Source: Research Square preprint supplement (doi:10.21203/rs.3.rs-6224694/v1), 2025-05-07
Supplement: Supplementary file 4 [file bed7f92c4f457595934525ae.xlsx]

## Sheet: 1. "Gametogenic" genes
			Length								p-distance
	Gene	Protein name	CDS (nt)		Protein (aa)			GC content (%)			x̅ (LL-RR)		LL-RR1		LL-RR2		LL-RR3		x̅ (RR-RR)		RR1-RR2		RR1-RR3		RR2-RR3		x̅ Xen - Pelophylax spp.		Accesion number NCBI
			LL	RR	LL	RR	EXN	LL	RR	Xen	nt	aa	nt	aa	nt	aa	nt	aa	nt	aa	nt	aa	nt	aa	nt	aa	nt	aa	Xenopus tropicalis	Mus musculus
1	adarb1	Double-stranded RNA-specific editase 1	2154	2154	717	717	9	44.9	44.8	43.87	0.01083	0.00279	0.01068	0.00279	0.01114	0.00279	0.01068	0.00279	0.00155	0	0.00232	0	0	0	0.00232	0	0.18541	0.09935	XM_018097020.1
2	adcy9	Adenylate cyclase type 9	3924	3924	1307	1307	10	48.7	48.8	50.64	0.01236	0.01119	0.01325	0.01071	0.01147	0.00995	n.a.	n.a.	0.0028	0.00056	0.0028	0.00077	n.a.	n.a.	n.a.	n.a.	0.24002	0.1695	XM_002932430.4
3	ago2	argonaute 2, RISC catalytic component	2595	2622/2595	864	873/864	19	46.4	46.3	47.16	0.00983	0.00116	0.00936	0.00116	0.00936	0.00116	n.a.	n.a.	0.00206	0	0.00234	0	n.a.	n.a.	n.a.	n.a.	0.16107	0.02784	XM_012964517.2
4	ago3	argonaute 3, RISC catalytic component	2583	n.a.	860	n.a.	19	47.9	n.a.	48.16	n.a.	n.a.	n.a.	n.a.	n.a.	n.a.	n.a.	n.a.	n.a.	n.a.	n.a.	n.a.	n.a.	n.a.	n.a.	n.a.	0.12815	0.00233	XM_002936224.4
5	ago4	argonaute 4, RISC catalytic component	2589	2589	862	862	17	46.9	47.1	46.93	0.00489	0.00116	0.00502	0.00116	0.00502	0.00116	0.00463	0.00116	0.00103	0	0	0	0.00154	0	0.00154	0	0.15044	0.00261	XM_004911574.3
6	akt1	RAC-alpha serine/threonine-protein kinase	1443	1443	480	480	12	40.5	40.6	41.77	0.00439	0.00208	0.00416	0.00208	0.00416	0.00208	0.00485	0.00208	0.00139	0	0	0	0.00208	0	0.00208	0	0.13046	0.01927	XM_002940717.4
7	anapc13	Anaphase promoting complex subunit 13	225	225	74	74	2	46.2	46	47.11	0.01037	0	0.01333	0	0.01333	0	0.00444	0	0.00593	0	0	0	0.00889	0	0.00889	0	0.22333	0.14865	NP_001017240
8	ar	Androgen receptor	2334	2334	777	777	8	52.9	54.1	56.91	n.a.	n.a.	n.a.	n.a.	n.a.	n.a.	n.a.	n.a.	n.a.	n.a.	n.a.	n.a.	n.a.	n.a.	n.a.	n.a.	0.23438	0.17992	XM_002941842.4
9	asz1	Ankyrin repeat, SAM and basic leucine zipper domain-containing protein 1	1425	1425	474	474	13	40.7	41	40.13	0.00912	0.00633	0.00912	0.00633	0.00912	0.00633	0.00912	0.00633	0	0	0	0	0	0	0	0	0.32806	0.39799	XM_012958624.2
10	atr	Serine/threonine-protein kinase ATR	7947	7947	2648	2648	48	43.4	43.4	42.94	0.00705	0.000453	0.00705	0.00453	0.00705	0.00453	0.00705	0.00453	0.00017	0	0.00025	0	0	0	0.00025	0	0.2544	0.20871	XM_012963312.2
11	aurka	Aurora kinase A	1245	1251	414	416	8	49.6	49.6	53.21	0.01473	0.0161	0.01606	0.01932	0.01526	0.01691	0.01285	0.01208	0.00214	0.00483	0.0008	0.00242	0.00321	0.00725	0.00241	0.00483	0.32391	0.28387	NM_001016570.2
12	bcar1	Breast cancer anti-estrogen resistance protein 1	2856	2871/2856	951	956/951	6	47.2	46.7	44.47	0.0089	0.00506	0.00866	0.00434	0.00903	0.00542	0.00903	0.00542	0.00144	0.00145	0.00036	0.00108	0.00181	0.00108	0.00217	0.00217	0.21253	0.16253	XM_012960799.2
13	bcar3	Breast cancer anti-estrogen resistance protein 3	2451	2448	816	815	11	45.5	45.4	45.08	0.01185	0.00942	0.01266	0.00983	0.01225	0.00983	0.01062	0.0086	0.00136	0.00082	0.00041	0	0.00204	0.00123	0.00163	0.00123	0.24793	0.24349	NM_001097265.1
14	birc5	Baculoviral IAP repeat-containing protein 5	525	525	174	174	4	55.3	54.9	49.07	0.01714	0.01149	0.01714	0.01149	0.01714	0.01149	0.01714	0.01149	0	0	0	0	0	0	0	0	0.27381	0.26079	NM_001044454.1
15	brd2	Bromodomain testis-specific protein	2343	2343	780	780	13	48	48.1	39.45	0.00455	0	0.00512	0	0.00469	0	0.00384	0	0.00285	0	0.00299	0	0.00171	0	0.00384	0	0.22303	0.14153	NM_001134810.1
16	btrc	F-box/WD repeat-containing protein 1A	1674	1674	557	557	12	45.8	47.8	46.16	0.00521	0.00121	0.00481	0	0.00542	0	0.00542	0.00181	0.0008	0.00121	0.0006	0	0.0006	0.00181	0.0012	0.00181	0.14472	0.01195	XM_012966589.2
17	bub1	Mitotic checkpoint serine/threonine-protein kinase BUB1	3321	3345/3348	1106	1114/1115	25	44.6	44.8	44.32	0.01527	0.01327	0.01507	0.01357	0.01507	0.01357	0.01567	0.01267	0.0008	0.0006	0	0	0.00121	0.0009	0.00121	0.0009	0.33768	0.37901	NM_001079362.1
18	bub3	Mitotic checkpoint protein BUB3	975	975	324	324	6	48.1	48.1	48.62	0.00444	0	0.00513	0	0.00513	0	0.00308	0	0.00137	0	0	0	0.00205	0	0.00205	0	0.14436	0.02778	BC079934.1
19	calm	Calmodulin	450	450	149	149	5	43.3	43.3	40.67	0	0	0	0	0	0	0	0	0	0	0	0	0	0	0	0	0.14889	0	NM_001008159.1
20	camk2g	Calcium/calmodulin-dependent protein kinase type II subunit gamma	1554	1554	517	517	19	45.5	45.7	46.09	0.00815	0.00193	0.00901	0.00193	0.00772	0.00193	0.00772	0.00193	0.00086	0	0.00129	0	0.00129	0	0	0	0.13208	0.01209	XM_012966016.2
21	ccna1	Cyclin-A1	1254	1254	417	417	8	45.9	46.1	47.54	0.01621	0.02238	0.01675	0.02158	0.01675	0.02158	0.01515	0.02398	0.00532	0.00639	0	0	0.00797	0.00959	0.00797	0.00959	0.29625	0.30396	NM_001016239.1
22	ccnb1	G2/mitotic-specific cyclin-B1	1194	1194	397	397	8?	54.5	54.5	44.72	0.01591	0.01008	0.01591	0.01008	0.01591	0.01008	0.01591	0.01008	0	0	0	0	0	0	0	0	0.26103	0.17028	NM_203790.1
23	ccnb1ip1	E3 ubiquitin-protein ligase CCNB1IP1	804	804	267	267	3	44.4	44.5	44.36	0.01202	0	0.01119	0	0.01368	0	0.01119	0	0.00166	0	0.00249	0	0	0	0.00249	0	0.27569	0.25283	XM_018089685.1
24	ccnb2	G2/mitotic-specific cyclin-B2	1176	1176	391	391	9	45.7	46.2	45.61	0.01701	0.01023	0.01701	0.01023	0.01701	0.01023	0.01701	0.01023	0.00113	0	0	0	0.0017	0	0.0017	0	0.25726	0.21337	NM_001145376.2
25	ccnb3	G2/mitotic-specific cyclin-B3	1251	1248	416	415	10	47.1	46.4	45.08	0.02083	0.01446	0.02083	0.01446	0.02083	0.01446	0.02083	0.01446	0	0	0	0	0	0	0	0	0.29085	0.28178	XM_002939199.4
26	ccne2	G1/S-specific cyclin-E2	1212	1212	403	403	10?	42.6	42.8	43.55	0.0099	0.01241	0.0099	0.01241	0.0099	0.01241	0.0099	0.01241	0	0	0	0	0	0	0	0	0.28518	0.26448	NM_001016267.2
27	cdc20	Cell division cycle protein 20 homolog	1527	1527	508	508	10	52.8	52.7	44.23	0.01834	0.00787	0.01834	0.00787	0.01834	0.00787	0.01834	0.00787	0	0	0	0	0	0	0	0	0.21949	0.08974	NM_203614.1
28	cdc25c	M-phase inducer phosphatase 3	1635	1635	544	544	16	44.5	44.4	44.66	0.01101	0.01287	0.01101	0.01287	0.01101	0.01287	0.01101	0.01287	0	0	0	0	0	0	0	0	0.28066	0.26134	XM_018091902.1
29	cdk1	Cyclin-dependent kinase 1	909	909	302	302	7	41.7	41.5	45.61	0.00367	0.00331	0.0033	0.00331	0.0033	0.00331	0.0044	0.00331	0.00073	0	0	0	0.0011	0	0.0011	0	0.19857	0.03063	NM_001145376.2
30	cdk2	Cyclin-dependent kinase 2	894	894	297	297	7	48.5	48.2	46.53	0.01007	0.00337	0.01007	0.00337	0.01007	0.00337	0.01007	0.00337	0	0	0	0	0	0	0	0	0.17925	0.05471	NM_001008135.1
31	cdk7	Cyclin-dependent kinase 7	1059	1059	352	352	11	43.8	43.7	44	0.00661	0.00095	0	0	0.01133	0	0.0085	0.00284	0.00944	0.00189	0.01133	0	0.0085	0.00284	0.0085	0.00284	0.21105	0.0831	NM_001017219.2
32	cpeb4	Cytoplasmic polyadenylation element-binding protein 4	2130	2130	709	709	8	48.7	49	47.14	0.00532	0.00141	0.00563	0.00141	0.00563	0.00141	0.00469	0.00141	0.00188	0	0.00094	0	0.00188	0	0.00282	0	0.14198	0.03317	XM_002936699.4
33	ctcf	Transcriptional repressor CTCF	2205	2205	734	734	10	42.6	42.6	44.31	0.00514	0.00272	0.00544	0.00272	0.00544	0.00272	0.00454	0.00272	0.00121	0	0.00091	0	0.00181	0	0.00091	0	0.18361	0.09426	NM_001122796.1
34	cyp26b1	Cytochrome P450 26B1	1536	1536	511	511	6	53.7	53.3	52.8	0.01172	0.00196	0.01172	0.00196	0.01172	0.00196	0.01172	0.00196	0	0	0	0	0	0	0	0	0.18408	0.08023	NM_001079187.2
35	dazl	Deleted in azoospermia-like	849	849	282	282	11?	43.9	43.7	44.6	0.00118	0.00355	0.00118	0.00355	0.00118	0.00355	0.00118	0.00355	0	0	0	0	0	0	0	0	0.40498	0.51534	NM_203748.1
36	ddx19	ATP-dependent RNA helicase DDX19	1479	1479	492	492	n.a.	53.1	52.8	53.89	0.01465	0.00813	0.0142	0.00813	0.0142	0.00813	0.01555	0.00813	0.0018	0	0.00135	0	0.00135	0	0.0027	0	0.20137	0.13223	CR760667.2
37	ddx25	ATP-dependent RNA helicase DDX25	1464	1467	487	488	8	46.8	45.6	40.69	0.02983	0.0219	0.02869	0.02053	0.02869	0.02053	0.0321	0.02464	0.00546	0.00274	0	0	0.0082	0.00411	0.0082	0.00411	0.33897	0.31144	NM_001016345.2
38	ddx4	Probable ATP-dependent RNA helicase DDX4	2226	2226	741	741	n.a.	42.4	42.5	42.08	0.01213	0.00991	0.01213	0.00946	0.01213	0.00946	0.01213	0.01081	0.0024	0.0009	0.0027	0	0.0027	0.00135	0.0018	0.00135	0.34107	0.38453	XM_018093500.1
39	dmc1	Meiotic recombination protein DMC1/LIM15 homolog	1026	1026	341	341	13	41	41	41.23	0.00715	0.00587	0.0078	0.00587	0.00682	0.00587	0.00682	0.00587	0.00065	0	0.00097	0	0.00097	0	0	0	0.19347	0.09164	XM_018093651.1
40	dmrt1	Doublesex and mab-3 related transcription factor 1	1005	1005	334	334	5	48.6	47.1	48.17	0.02023	0.02994	0.0199	0.02994	0.0199	0.02994	0.0209	0.02994	0.00199	0.00399	0.00199	0.00599	0.00299	0.00599	0.00095	0	0.28654	0.34187	XM_018089347.1
41	dmrt2	Doublesex and mab-3 related transcription factor 2	1566	n.a.	521	n.a.	3	49.6	n.a.	49.46	n.a.	n.a.	n.a.	n.a.	n.a.	n.a.	n.a.	n.a.	n.a.	n.a.	n.a.	n.a.	n.a.	n.a.	n.a.	n.a.	0.24568	0.22115	NM_001100256.1
42	dmrt5	Doublesex and mab-3 related transcription factor 5	1317	n.a.	438	n.a.	2	58.1	n.a.	55.18	n.a.	n.a.	n.a.	n.a.	n.a.	n.a.	n.a.	n.a.	n.a.	n.a.	n.a.	n.a.	n.a.	n.a.	n.a.	n.a.	0.20366	0.11264	HQ171197.1
43	dnmt1	DNA (cytosine-5)-methyltransferase 1	4470/4476	4476	1489/1491	1491	32	45.9	46.1	46.55	0.00871	0.00671	0.00871	0.00671	0.00871	0.00671	0.00871	0.00671	0	0	0	0	0	0	0	0	0.22041	0.15803	XM_002934338.4
44	dnmt3a	DNA (cytosine-5)-methyltransferase 3A	2682	2682	893	893	21	52.8	52.9	52.91	0.01156	0.00448	0.01156	0.00448	n.a.	n.a.	n.a.	n.a.	n.a.	n.a.	n.a.	n.a.	n.a.	n.a.	n.a.	n.a.	0.17062	0.07821	XM_004919615.3
45	dusp1	Dual specificity protein phosphatase 1	1110	1110	369	369	4	49.7	49.6	48.56	0.00901	0	0.00991	0	0.00901	0	0.00811	0	0.0024	0	0.0027	0	0.0018	0	0.0027	0	0.18896	0.1084	NM_001005450.2
46	eif4g3	Eukaryotic translation initiation factor 4 gamma 3	5160	5160	1719	1719	n.a.	57	56.9	57.48	0.01395	0.01028	0.01415	0.00989	0.01453	0.01047	0.01318	0.01047	0.00304	0.0031	0.00155	0.00175	0.00349	0.00291	0.00407	0.00465	0.25842	0.22569	NM_001142072.1
47	eme1	Crossover junction endonuclease EME1	777	777	258	258	6	49.8	49.3	55.53	0.0182	0.03488	0.01802	0.03488	0.01802	0.03488	0.01802	0.03488	0	0	0	0	0	0	0	0	0.33912	0.3595	NM_001078831.1
48	eme2	Probable crossover junction endonuclease EME2	1560	1560	519	519	8	47.9	47.9	49.54	0.01923	0.02697	0.01731	0.02697	0.02115	0.0289	0.01923	0.02505	0.00897	0.01156	0.00513	0.00578	0.01346	0.01734	0.00833	0.01156	0.36123	0.39337	NM_001079392.1
49	exd1	piRNA biogenesis protein EXD1	1155	1155	384	384	10	42.3	42.3	44.16	0	0	0	0	0	0	0	0	0	0	0	0	0	0	0	0	0.40426	0.456	XM_004917310.3
50	fbxo43	F-box only protein 43	2157	2160	718	719	5	42.2	41.7	43.06	0.01731	0.02281	0.01762	0.02374	0.017155	0.02235	n.a.	n.a.	0.00185	0.00186	0.002315	0.00279	n.a.	n.a.	n.a.	n.a.	0.31881	0.35337	XM_004915140.3
51	fbxo5	F-box only protein 5	1212	1170	403	389	4	41.6	41.5	40.56	0.01766	0.01976	0.01453	0.01546	0.01966	0.0232	0.0188	0.02062	0.00342	0.00515	0.00513	0.00773	0.00427	0.00515	0.00085	0.00258	0.3534	0.40945	XM_012963092.1
52	fgf9	Fibroblast growth factor 9	630	630	209	209	3	46.6	46.6	48.8	0.0037	0	0.00159	0	0.00476	0	0.00476	0	0.00212	0	0.00317	0	0.00317	0	0	0	0.13357	0.03846	XM_002938575.4
53	fkbp6	Inactive peptidyl-prolyl cis-trans isomerase FKBP6	990	990	329	329	8	45	45.4	45.58	0.01296	0.01165	0.011615	0.01064	0.015655	0.01368	0.011615	0.01064	0.00404	0.00608	0.00606	0.00912	0	0	0.00606	0.00912	0.33086	0.35294	XM_018091140.1
54	foxc1	Forkhead box protein C1	1482	1488	493	495	1?	54.9	54.6	59.61	0.00945	0.00473	0.00877	0.00609	0.01012	0.00406	0.00945	0.00406	0.0018	0.00135	0.0027	0.00203	0.00202	0.00203	0.00067	0	0.16803	0.09867	NM_001007863.1
55	grb2	Growth factor receptor-bound protein 2	690	690	229	229	5	46.6	47.2	49.86	0.01498	0	0.01594	0	0.01449	0	0.01449	0	0.00097	0	0.00145	0	0.00145	0	0	0	0.13949	0.0262	NM_001008129.1
56	h3.3	Histone H3.3	411	411	136	136	3	56	56.2	55.23	0.00243	0	0.00243	0	0.00243	0	0.00243	0	0	0	0	0	0	0	0	0	0.07725	0	NM_001005101.1
57	hat1	Histone acetyltransferase type B catalytic subunit	1227	1227	408	408	11	42.8	42.4	42.35	0.00733	0.00735	0.00733	0.00735	0.00733	0.00735	0.00733	0.00735	0	0	0	0	0	0	0	0	0.19582	0.12624	XM_012970071.2
58	hdac1	Histone deacetylase 1	1443	1443	480	480	14	42.8	42.9	42.97	0.0067	0	0.00693	0	0.00693	0	0.00624	0	0.00046	0	0	0	0.00069	0	0.00069	0	0.18399	0.05833	NM_001030393.1
59	hec1	Kinetochore protein NDC80 homolog	1917	1917	638	638	16	51.8	51.7	53.15	0.01287	0.0094	0.01565	0.01411	0.01148	0.00784	0.01148	0.00627	0.00487	0.00522	0.00522	0.00627	0.0073	0.00784	0.00209	0.00157	0.26411	0.25432	NM_001011162.1
60	henmt1	Small RNA 2'-O-methyltransferase	1125	1125	374	374	6	39.7	39.5	42.61	0.01007	0.01693	0.01067	0.01604	0.01156	0.01872	0.008	0.01604	0.00356	0.00535	0.00089	0.00267	0.00444	0.00535	0.00533	0.00802	0.36104	0.41463	XM_012960696.2
61	hormad1	HORMA domain-containing protein 1	1161	1161	386	386	12	44.4	44.6	43.9	0.00947	0.01036	0.00947	0.01036	0.01034	0.01036	0.00861	0.01036	0.00115	0	0.00086	0	0.00086	0	0.00172	0	0.32021	0.35461	XM_002935467.2
62	igf1	Insulin-like growth factor 1	462	462	153	153	4	45.4	44.7	45.45	0.01082	0.00654	n.a.	n.a.	0.010823	0.00654	n.a.	n.a.	n.a.	n.a.	n.a.	n.a.	n.a.	n.a.	n.a.	n.a.	0.15693	0.13399	XM_002936829.4
63	igf1r	Insulin-like growth factor 1 receptor	3330	3327	1109	1108	18	43.5	44.6	47.84	0.00643	0.00828	0.00643	0.00828	0.00643	0.00828	n.a.	n.a.	0	0	0	0	n.a.	n.a.	n.a.	n.a.	0.38585	0.38377	XM_002933305.4
64	ints13	Integrator complex subunit 13	2157	2157	718	718	17	48.6	48.5	56.17	0.0102	0.00696	0.00371	0.00139	0.01298	0.00975	0.01391	0.00975	0.00742	0.00557	0.0102	0.00836	0.0102	0.00836	0.00185	0	0.22741	0.10893	NM_001004984.1
65	itpr1	Inositol 1,4,5-trisphosphate receptor type 1	8049	8043	2682	2680	47?	52.5	52.7	46.49	0.01517	0.00374	0.01496	0.00374	0.01534	0.00374	0.01521	0.00374	0.00125	0	0.00062	0	0.0015	0	0.00162	0	0.19718	0.05114	XM_012961730.2
66	kif22	Kinesin-like protein KIF22	1929	1929	642	642	13	49.7	49.6	57.85	0.00623712	0.00364427	0.00518403	0.00311526	0.00523286	0.00314465	0.00829445	0.0046729	0.00555568	0.00104332	0	0	0.00829445	0.00155763	0.00837258	0.00157233	0.25918	0.22863	XM_012954607.2
67	kmt2a	Histone-lysine N-methyltransferase 2A	7983	n.a.	2660	n.a.	31	45.5	45.6	46	0.0089	0.00955	0.0089	0.00955	n.a.	n.a.	n.a.	n.a.	n.a.	n.a.	n.a.	n.a.	n.a.	n.a.	n.a.	n.a.	0.3167	0.32856	XM_018096068.1
68	m1ap	Meiosis 1 arrest protein	1461	1464	486	487	9	56.2	56.3	54.93	0.02259	0.02058	0.02259	0.02058	0.02259	0.02058	0.02259	0.02058	0	0	0	0	0	0	0	0	0.44874	0.51939	NM_001130377.1
69	mad2l1	Mitotic spindle assembly checkpoint protein MAD2A	612	612	203	203	5	44.5	44.3	40.85	0.00654	0.00493	0.00654	0.00493	0.00654	0.00493	0.00654	0.00493	0	0	0	0	0	0	0	0	0.18144	0.09035	NM_001103058.1
70	mael	Protein maelstrom homolog	1266	1263	421	420	13	46	46.4	45.91	0.02692	0.03095	0.02692	0.03095	0.02692	0.03095	0.02692	0.03095	0	0	0	0	0	0	0	0	0.38587	0.43402	NM_001079177.1
71	map2k1	Dual specificity mitogen-activated protein kinase kinase 1	1227	1227	408	408	11	51.9	51.7	48.4	0.00815	0	0.00733	0	0.00896	0	0.00815	0	0.0038	0	0.00163	0	0.00407	0	0.0057	0	0.18434	0.03797	NM_001008057.1
72	map3k7	Mitogen-activated protein kinase kinase kinase 7	1827	1827	608	608	17	44	44.1	42.82	0.0042	0.00329	0.00438	0.00329	0.00438	0.00329	0.00383	0.00329	0.00109	0	0.001095	0	0.00164	0	0.00055	0	0.147436	0.0422535	XM_018093745.1
73	mapk1	Mitogen-activated protein kinase 1	1089	1089	362	362	8	43.8	43.9	43.74	0.00398	0	0.00367	0	0.00459	0	0.00367	0	0.00122	0	0.00092	0	0.00184	0	0.00092	0	0.12937	0.00277	NM_001017127.2
74	mapk12	Mitogen-activated protein kinase 12	1089	1089	362	362	12	44.6	44.5	42.14	0.00888	0.00276	0.00918	0.00276	0.00826	0.00276	0.00918	0.00276	0.00061	0	0.00092	0	0	0	0.00092	0	0.17488	0.07774	XM_018092105.1
75	marf1	Meiosis regulator and mRNA stability factor 1	5064	5064	1687	1687	25	43.5	43.7	43.32	0.01284	0.01462	0.01323	0.01541	0.01264	0.01482	0.01264	0.01363	0.00145	0.00198	0.00197	0.00237	0.00138	0.00237	0.00099	0.00119	0.25295	0.24326	NM_001126066.1
76	mdc1	Mediator of DNA damage checkpoint protein 1	6771	6708	2256	2235	16	45.8	45.7	41.53	0.02954	0.05389	0.02954	0.05419	0.0295	0.05419	0.02907	0.05329	0.00164	0.00268667	0.00119	0.00179	0.00209	0.00269	0.00268	0.00358	0.52541	0.68671	XM_012969222.2
77	mei4	Meiosis-specific protein MEI4	1212	n.a.	403	n.a.	5	36.8	38.2	36.39	0.01375	0.02067	n.a.	n.a.	n.a.	n.a.	0.01375	0.02067	n.a.	n.a.	n.a.	n.a.	n.a.	n.a.	n.a.	n.a.	0.40634	0.53591	XM_018094012.1
78	meig1	Meiosis-expressed gene 1 protein homolog	276	276	91	91	2	38.7	38.4	35.96	0.00362	0	0.00362	0	0.00362	0	0.00362	0	0	0	0	0	0	0	0	0	0.1676	0.15909	NM_001016522.2
79	meiob	Meiosis-specific with OB domain-containing protein	1419	1419	472	472	13	43.7	43.7	42.5	0.01339	0.01059	0.01339	0.01059	0.01339	0.01059	0.01339	0.01059	0	0	0	0	0	0	0	0	0.28964	0.33457	XM_012970697.2
80	mlh1	DNA mismatch repair protein Mlh1	2265	2265	754	754	19	42.4	42.2	41.56	0.0128	0.01061	0.01457	0.01194	0.01192	0.00928	0.0128	0.009945	0.00274	0.00354	0.00486	0.00531	0.00221	0.00199	0.00265	0.003315	0.24406	0.19589	XM_002933409.3
81	mlh3	DNA mismatch repair protein Mlh3	3681	3708	1226	1235	12	49	48.6	39.34	0.0242938	0.0426554	0.0242938	0.0415254	0.0242938	0.0432203	0.0242938	0.0432203	0.00263653	0.00225989	0.0039548	0.00338983	0.0039548	0.00338983	0	0	0.45397	0.540576	NM_001251842.2
82	mnd1	Meiotic nuclear division protein 1 homolog	618	618	205	205	8	43.4	42.9	41.19	0.0113269	0.01626	0.00161812	0	0.0177994	0.02439	0.0145631	0.02439	0.0118662	0.01626	0.0161812	0.02439	0.0161812	0.02439	0.00323625	0	0.2356	0.18421	XM_012961773.1
83	mns1	Meiosis-specific nuclear structural protein 1	1500	1500	499	499	9	43.6	43.3	42.02	0.01111	0.00935	0.01067	0.01002	0.01133	0.01002	0.01133	0.00802	0.00356	0.00134	0.00333	0	0.00333	0.002	0.004	0.002	0.25636	0.22189	NM_001103012.2
84	mov10l1	RNA helicase Mov10l1	3690	3687	1229	1228	26	41.3	41.2	42.09	0.01004	0.01059	0.01004	0.01059	n.a.	n.a.	0.01004	0.01059	0	0	n.a.	n.a.	0	0	n.a.	n.a.	0.30367	0.30683	NM_001079156.1
85	mre11	Double-strand break repair protein MRE11	2136	2136	711	711	19	45.2	44.8	46.95	0.01358	0.00703	0.01404	0.00844	0.01404	0.00844	0.01264	0.00422	0.00468	0.00469	0	0	0.00702	0.00703	0.00702	0.00703	0.24458	0.16962	XM_012956402.2
86	msh2	DNA mismatch repair protein Msh2	2793	2793	930	930	16	47.2	47.1	44.98	0.01325	0.0043	0.01325	0.0043	0.01325	0.0043	0.01325	0.0043	0.00095	0	0.00143	0	0.00143	0	0	0	0.20202	0.1086	XM_002935381.4
87	msh4	MutS protein homolog 4	2289	2289	762	762	18	41.5	41.4	37.46	0.01484	0.00706	0.01543	0.00662	0.01587	0.00662	0.01322	0.00795	0.00499	0.00265	0.00132	0	0.00661	0.00397	0.00705	0.00397	0.26708	0.25728	XM_018093532.1
88	msh5	MutS protein homolog 5	2424	2424	807	807	25	43.8	43.7	42.68	0.00894	0.00743	0.00949	0.00743	0.00866	0.00743	0.00866	0.00743	0.0011	0	0.00165	0	0.00165	0	0	0	0.3	0.31473	XM_018096397.1
89	msh6	DNA mismatch repair protein Msh6	4017	4017	1338	1338	10	46.2	46.2	45.36	0.0122	0.00947	0.0122	0.00897	0.0122	0.00972	0.0122	0.00972	0.00033	0.0005	0.0005	0.00075	0.0005	0.00075	0	0	0.23255	0.18839	XM_002935375.3
90	msx1	Homeobox protein MSX-1	843	843	280	280	2	50.8	50.7	57	0.00771	0.01071	0.0083	0.01071	0.00712	0.01071	n.a.	n.a.	0.00119	0	0.00119	0	n.a.	n.a.	n.a.	n.a.	0.2283	0.1685	NM_001037252.1
91	mus81	Crossover junction endonuclease MUS81	1818	1818	605	605	16	44	43.9	46.33	0.00991	0.01545	0.00991	0.0149	0.00991	0.01325	0.00991	0.01821	0.00294	0.00662	0.0022	0.00497	0.0033	0.00828	0.0033	0.00662	0.29983	0.24172	NM_001011004.1
92	mybl1	Myb-related protein A	804	804	267	267	3	44.6	44.5	43.05	0.00083	0	0	0	0.00249	0	0	0	0.00166	0	0.00249	0	0	0	0.00249	0	0.36489	0.42496	XM_002935319.4
93	nbn	Nibrin	2301	2292/2289	766	763/762	16	41.5	41.8	42.53	0.01616	0.02362	0.0166	0.02493	0.01529	0.02231	0.0166	0.02362	0.00524	0.00962	0.00699	0.01312	0.00087	0.00131	0.00786	0.01444	0.39888	0.45665	XM_018095158.1
94	nusap1	Nucleolar and spindle-associated protein 1	1263	1263	420	420	11	41.6	42.1	46.2	0.0004	0.00119	0.00079	0.00238	n.a.	n.a.	0	0	0.00079	0.00238	n.a.	n.a.	0.00079	0.00238	n.a.	n.a.	0.36063	0.42382	XM_012968505.2
95	parn	Poly(A)-specific ribonuclease PARN	1905	1905	634	634	24	40.1	40.2	40.18	0.01715	0.01577	0.0168	0.01577	0.01785	0.01735	0.0168	0.0142	0.00385	0.00421	0.0042	0.00473	0.00525	0.00473	0.0021	0.00315	0.20636	0.18027	XM_012970508.2
96	pelp1	Proline-, glutamic acid- and leucine-rich protein 1	3270	3270	1089	1089	16	52.2	52.4	57.8	0.01163	0.00888	0.01202	0.00827	0.01133	0.00827	0.01255	0.01011	0.00286	0.00123	0.00092	0	0.00398	0.00184	0.00367	0.00184	0.3132	0.31392	XM_012953417.2
97	piwil2	Piwi-like protein 2	2853	2853	950	950	24	46.1	46.1	46.42	0.01601	0.01789	0.01542	0.01789	0.01577	0.01895	0.01682	0.01684	0.0021	0.00281	0.00035	0.00105	0.0028	0.00316	0.00315	0.00421	0.29822	0.28359	XM_018091922.1
98	piwil4	Piwi-like protein 4	2502	2502	833	833	20	45.9	45.8	50.78	0.00679	0.0064	0.00639	0.006	0.00639	0.006	0.00759	0.0072	0.0008	0.0008	0	0	0.0012	0.012	0.0012	0.0012	0.33233	0.32752	XM_012958238.1
99	pkmyt1	Membrane-associated tyrosine- and threonine-specific cdc2-inhibitory kinase	1644	1644	547	547	7	56.2	56.1	50.91	0.01784	0.01523	0.02068	0.01828	0.01217	0.00914	0.02068	0.01828	0.00811	0.00853	0.01217	0.0128	0	0	0.01217	0.0128	0.28321	0.24771	XM_012970107.2
100	pld6	Mitochondrial cardiolipin hydrolase	492	492	163	163	2	55.6	55.4	56.71	0.01287	0.00409	0.01423	0.00613	0.01016	0	0.01423	0.00613	0.00542	0.00409	0.00813	0.00613	0.00407	0	0.00407	0.00613	0.29887	0.27019	NM_001016875.3
101	plk1	Serine/threonine-protein kinase PLK1	1779	1779	592	592	10	51.3	50.9	50.08	0.01574	0.00676	0.01574	0.00676	0.01574	0.00676	0.01574	0.00676	0.00225	0	0	0	0.00337	0	0.00337	0	0.19084	0.010346	NM_213679.2
102	pms1	PMS1 protein homolog 1	2664	2664	887	887	12	38.6	38.9	37.31	0.01814	0.03157	0.01802	0.03044	0.01839	0.03269	0.01802	0.03157	0.00075	0.0015	0.00113	0.00225	0.00075	0.00113	0.00038	0.00113	0.35452	0.43948	NM_001142901.2
103	pms2	Mismatch repair endonuclease PMS2	2517	2517/2520	838	838/839	13	40	39.8	44.64	0.0102	0.01551	0.00954	0.01671	0.01033	0.01551	0.01073	0.01432	0.00185	0.00318	0.00238	0.00119	0.00278	0.00477	0.0004	0.00358	0.2948	0.28589	XM_002931979.4
104	ppp1ca	Serine/threonine-protein phosphatase PP1-alpha catalytic subunit	984	984	327	327	7	48.9	48.8	57.19	0.00982	0	0.01524	0	0	0	0.01423	0	0.01152	0	0.01524	0	0.00508	0	0.01423	0	0.18068	0.01227	NM_001127010.1
105	ppp2r1a	Serine/threonine-protein phosphatase 2A 65 kDa regulatory subunit A alpha isoform	1770	1770	589	589	15	52.2	51.9	49.44	0.01714	0.0017	0.01638	0.0017	0.01751	0.0017	0.01751	0.0017	0.00075	0	0.00113	0	0.00113	0	0	0	0.17034	0.0174	NM_204074.1
106	ppp2r5a	Serine/threonine-protein phosphatase 2A 56 kDa regulatory subunit alpha isoform	1422	1422	473	473	13	43.8	43.9	43.33	0.00891	0.00211	0.00914	0.00211	0.00914	0.00211	0.00844	0.00211	0.00047	0	0	0	0.0007	0	0.0007	0	0.16842	0.06184	NM_001078689.1
107	ppp3ca	Serine/threonine-protein phosphatase 2B catalytic subunit alpha isoform	1533	1533	510	510	13	43.3	43.4	41.08	0.00739	0.00196	0.00718	0.00196	0.00783	0.00196	0.00718	0.00196	0.00174	0	0.00065	0	0.00261	0	0.00196	0	0.10274	0.02794	XM_012955571.2
108	prc1	Protein regulator of cytokinesis 1	1827	1827	608	608	14	42.5	42.9	41.98	0.00876	0.00164	0.00876	0.00164	0.00876	0.00164	0.00876	0.00164	0	0	0	0	0	0	0	0	0.25048	0.23846	XM_012958665.2
109	prdm9	Histone-lysine N-methyltransferase PRDM9	1854	1854	617	617	1?	53.2	53	43.95	0.01438	0.01621	0.01672	0.02107	0.01294	0.01297	0.01348	0.01459	0.01187	0.0108	0.01564	0.01459	0.01402	0.01621	0.00593	0.00162	0.50739	0.59091	NM_001113936.1
110	prkaca	cAMP-dependent protein kinase catalytic subunit alpha	1056	1056	351	351	10	44.1	43.8	46.78	0.00537	0	0.00473	0	0.00568	0	0.00568	0	0.00063	0	0.00095	0	0.00095	0	0	0	0.15112	0.02454	XM_018092865.1
111	psmc3ip	Homologous-pairing protein 2 homolog	663	645	220	214	2	43.5	42.9	41.67	0.02326	0.02025	0.02326	0.02336	0.02326	0.01869	0.02326	0.01869	0.00207	0.00312	0.0031	0.00467	0.0031	0.00467	0	0	0.24355	0.22156	XM_012966161.1
112	pttg1	Securin	564	564	187	187	5	44.3	44.3	39.49	0.01537	0.0303	0.01596	0.03209	0.01418	0.02674	0.01596	0.03209	0.00355	0.0107	0.00532	0.01604	0.00355	0.0107	0.00177	0.00535	0.40897	0.54098	XM_004913488.3
113	rad21	Double-strand-break repair protein rad21 homolog	1890	1887	629	628	13	47.9	48	48.15	0.0083	0.00425	0.00795	0.00318	0.00901	0.00637	0.00795	0.00318	0.00071	0.00212	0.00106	0.00318	0	0	0.00106	0.00318	0.18446	0.07516	XM_012965196.2
114	rad50	DNA repair protein RAD50	3939	3939	1312	1312	25	43.7	44.4	41.53	0.00872	0.0061	0.00863	0.0061	0.00863	0.0061	0.00889	0.0061	0.00051	0	0	0	0.00076	0	0.00076	0	0.2314	0.15339	XM_012959771.2
115	rad51	DNA repair protein RAD51 homolog 1	1008	1008	335	335	9	45.1	45.1	49.26	0	0	0	0	0	0	0	0	0	0	0	0	0	0	0	0	0.18948	0.0209	NM_001016393.3
116	rad51ap1	RAD51-associated protein 1	1098	1101	365	366	9	44.3	44.8	44.93	0.01943	0.01735	0.01913	0.01644	0.01913	0.01644	0.02004	0.01918	0.00182	0.00183	0	0	0.00273	0.00274	0.00273	0.00274	0.35449	0.39623	XM_002940303.4
117	rad52	DNA repair protein RAD52 homolog	1302	1290	433	429	11	50	50	54.8	0.00698	0.00855	0.00155	0.00466	0.01008	0.01166	0.0093	0.00932	0.0062	0.00622	0.00853	0.00699	0.0093	0.00932	0.00078	0.00233	0.33094	0.31971	NM_001097220.1
118	rad54l	DNA repair and recombination protein RAD54-like	2229	2229	742	742	18	55.2	55.5	44.24	0.02094	0.00809	0.02109	0.00809	0.02153	0.00809	0.02019	0.00809	0.0009	0	0.00045	0	0.0009	0	0.00135	0	0.251235	0.0954791	NM_001001241.2
119	rbbp8	DNA endonuclease RBBP8	2607	2610	868	869	17	43.7	43.7	43.91	0.01139	0.01376	0.01139	0.01376	n.a.	n.a.	0.01139	0.01376	0	0	n.a.	n.a.	0	0	n.a.	n.a.	0.34668	0.40976	XM_012965325.2
120	rec114	Meiotic recombination protein REC114	651	n.a.	216	n.a.	6	44.1	44	n.a.	0.00768	0.00926	n.a.	n.a.	0.00768	0.00926	n.a.	n.a.	n.a.	n.a.	n.a.	n.a.	n.a.	n.a.	n.a.	n.a.	n.a.	n.a.	-	NM_028598.1
121	rec8	Meiotic recombination protein REC8 homolog	2277	2277	758	758	19	46.3	46.8	48.03	0.01449	0.01979	0.01449	0.01979	n.a.	n.a.	n.a.	n.a.	n.a.	n.a.	n.a.	n.a.	n.a.	n.a.	n.a.	n.a.	0.34915	0.40938	NM_001079137.1
122	recq1	ATP-dependent DNA helicase Q1	1974	1974	657	657	15	47.4	47.4	57.84	0.00979	0.00558	0.00912	0.00457	0.00912	0.00457	0.01114	0.00761	0.00946	0.00406	0	0	0.01418	0.00609	0.01418	0.00609	0.27743	0.18063	NM_001016316.2
123	rpa1	Replication protein A 70 kDa DNA-binding subunit	1839	1839	612	612	17	44.7	44.9	43.44	0.01124	0.00654	0.01088	0.00654	0.01142	0.00654	0.01142	0.00654	0.00036	0	0.00054	0	0.00054	0	0	0	0.21489	0.13136	NM_001015732.1
124	rpa2	Replication protein A 32 kDa subunit	831	831	276	276	9	44.3	44.8	45.41	0.00682	0	0.00602	0	0.00602	0	0.00842	0	0.0016	0	0	0	0.00241	0	0.00241	0	0.20012	0.12088	NM_001006794.1
125	rpa3	Replication protein A 14 kDa subunit	366	366	121	121	4	48.4	47.9	44.26	0.01913	0.01377	0.00273	0	0.03005	0.02479	0.02459	0.01653	0.01821	0.01653	0.02732	0.02479	0.02186	0.01653	0.00546	0.00826	0.26434	0.26653	NM_001016626.2
126	rps6ka3	Ribosomal protein S6 kinase alpha-3	2214	2214	737	737	22	43.7	43.9	43.34	0.01099	0.00271	0.01084	0.00271	0.01129	0.00271	0.01084	0.00271	0.0006	0	0.00045	0	0.0009	0	0.00045	0	0.14796	0.03723	XM_002936044.4
127	sfr1	Swi5-dependent recombination DNA repair protein 1 homolog	729	714	242	237	3	44.6	45.2	40.29	0.01961	0.02954	0.01961	0.02954	0.01961	0.02954	0.01961	0.02954	0	0	0	0	0	0	0	0	0.36898	0.37097	XM_012967754.2
128	sgo1	Shugoshin 1	2016	2019	671	672	9	41.6	41.4	40.87	0.01753	0.02644	0.01753	0.02644	0.01753	0.02644	0.01753	0.02644	0	0	0	0	0	0	0	0	0.42098	0.51047	XM_012964257.2
129	skp1	S-phase kinase-associated protein 1	492	492	163	163	5	39.9	40.1	40.24	0.00407	0	0.00407	0	0.00407	0	0.00407	0	0	0	0	0	0	0	0	0	0.13415	0	XM_012959026.2
130	smc1a	Structural maintenance of chromosomes protein 1A	3687	3687	1228	1228	25	49.2	48.9	46.23	0.01239	0.00054	0.01248	0.00081	0.01248	0.00081	0.01221	0	0.0009	0.00054	0.00054	0	0.00081	0.00081	0.00136	0.00081	0.17718	0.04031	XM_002935514.3
131	smc1b	Structural maintenance of chromosomes protein 1B	3687	3687	1228	1228	25	40.8	40.6	46.51	0.00515	0.00326	0.00542	0.00407	0.00515	0.00326	0.00488	0.00244	0.00036	0.00109	0.00027	0.00081	0.00054	0.00163	0.00027	0.00081	0.3029	0.31556	NM_001278349.2
132	smc3	Structural maintenance of chromosomes protein 3	3654	3654	1217	1217	8	44.7	45.1	46.66	0.00848	0.00082	0.00848	0.00082	0.00848	0.00082	0.00848	0.00082	0	0	0	0	0	0	0	0	0.18145	0.0332	XM_002939498.4
133	spata1	Spermatogenesis-associated protein 1	1497	n.a.	498	n.a.	12	46.7	n.a.	40.58	n.a.	n.a.	n.a.	n.a.	n.a.	n.a.	n.a.	n.a.	n.a.	n.a.	n.a.	n.a.	n.a.	n.a.	n.a.	n.a.	0.37643	0.46154	XM_002931696.4
134	spata2	Spermatogenesis-associated protein 2	1575	1575	524	524	2	49.7	50	45.96	0.01548	0.00954	0.01527	0.00954	0.01527	0.00954	0.0159	0.00954	0.00042	0	0	0	0.00064	0	0.00064	0	0.2312	0.19643	XM_002933154.4
135	spata22	Spermatogenesis-associated protein 22	957	957	318	318	7	39.2	38.5	38.76	0.01498	0.0304	0.01463	0.03145	0.01567	0.0283	0.01463	0.03145	0.00348	0.00629	0.00522	0.00943	0	0	0.00522	0.000943	0.4034	0.52316	XM_012957517.2
136	spata4	Spermatogenesis-associated protein 4	816	816	271	271	6	43.2	42.8	44.73	0.01062	0	0.01103	0	0.0098	0	0.01103	0	0.00082	0	0.00123	0	0	0	0.00123	0	0.25919	0.27306	XM_002933324.4
137	spata5	Spermatogenesis-associated protein 5	2565	2565	854	854	17	45.4	45.6	45.28	0.01481	0.01405	0.01481	0.01405	0.01481	0.01405	0.01481	0.01405	0	0	0	0	0	0	0	0	0.28605	0.26585	XM_004911116.3
138	spdyc	Speedy protein C	876	876	291	291	6	49.1	48.8	47.1	0.00609	0.00344	0.00685	0.00344	0.00571	0.00344	0.00571	0.00344	0.00076	0	0.00114	0	0.00114	0	0	0	0.28253	0.27234	XM_004913654.3
139	spo11	Meiotic recombination protein SPO11	1206	1206	401	401	13	49.2	48.7	45.81	0.01548	0.01413	0.01244	0.01247	0.01658	0.01496	0.01741	0.01496	0.0094	0.00166	0.00746	0.00249	0.00995	0.00249	0.01078	0	0.42825	0.47252	NM_001008199.1
140	stra8	Stimulated by retinoic acid gene 8 protein homolog	807	807	268	268	7	48.8	49.1	52.78	0.01115	0.01866	0.01115	0.01866	0.01115	0.01866	0.01115	0.01866	0	0	0	0	0	0	0	0	0.50692	0.66572	XM_018089880.1
141	sumo1	Small ubiquitin-related modifier 1	309	309	102	102	5	42.4	42.7	42.07	0.00647	0.0098	0.00647	0.0098	0.00647	0.0098	0.00647	0.0098	0	0	0	0	0	0	0	0	0.13916	0.02696	NM_001005111.1
142	sun1	SUN domain-containing protein 1	2733	2727	910	908	n.a.	44.3	44	44.1	0.01051	0.0117433	0.01063	0.01101	0.01027	0.01211	0.01063	0.01211	0.00146	0.0022	0.00183	0.0033	0.00073	0.0011	0.00183	0.0022	0.33029	0.35926	XM_012971093.2
143	suv39h1	Histone-lysine N-methyltransferase SUV39H1	1275	1275	424	424	6	46.8	46.9	60.38	0.00627	0.00943	0.00627	0.00943	0.00627	0.00943	0.00627	0.00943	0	0	0	0	0	0	0	0	0.28613	0.25087	XM_002944399
144	syce2	Synaptonemal complex central element protein 2	507	507	168	168	3	46.8	47.1	46.27	0.01709	0.02778	0.01578	0.02381	0.01775	0.02976	0.01775	0.02976	0.00526	0.00397	0.00592	0.00595	0.00592	0.00595	0.00394	0	0.42864	0.5738	XM_018092692.1
145	syce3	Synaptonemal complex central element protein 3	267	267	88	88	2	44.2	44.5	43.88	0.00499	0	0.00749	0	0	0	0.00749	0	0.00499	0	0.00749	0	0	0	0.00749	0	0.35393	0.43182	XM_002939528.2
146	sycp1	Synaptonemal complex protein 1	2994	2994	997	997	30	34.9	34.8	34.81	0.00902	0.01672	0.01002	0.02006	0.00935	0.01805	0.00768	0.01204	0.00601	0.01404	0.00134	0.00401	0.00868	0.02006	0.00802	0.01805	0.43325	0.61515	XM_018091546.1
147	sycp3	Synaptonemal complex protein 3	717	717	238	238	8	39	38.5	41.38	0.00837	0.01261	0.00837	0.01261	0.00837	0.01261	0.00837	0.01261	0	0	0	0	0	0	0	0	0.2593	0.29418	NM_001078758.1
148	tdrd1	Tudor domain-containing protein 1	4014	4017/4005	1337	1338/1334	22	44.9	45.1	50.81	0.00993	0.01971	0.01191	0.02257	0.00932	0.01946	0.00584	0.01712	0.00501	0.00882	0.00673	0.01245	0.00699	0.01167	0.00129	0.00233	0.46597	0.57867	XM_004919374.3
149	tdrd3	Tudor domain-containing protein 3	2232	2232	743	743	13	42.7	42.5	41.96	0.01269	0.01525	0.01344	0.01615	0.0121	0.0148	0.01254	0.0148	0.00239	0.00269	0.00224	0.00135	0.00269	0.00404	0.00224	0.00269	0.22687	0.24573	NM_204054.1
150	tdrd5	Tudor domain-containing protein 5	3249	3249	1082	1082	16	43.8	43.7	41.91	0.00616	0.01201	0.00616	0.01201	n.a.	n.a.	0.00616	0.01201	0	0	n.a.	n.a.	0	0	n.a.	n.a.	0.43783	0.53591	NM_001079295.1
151	tdrd9	Tudor domain-containing protein 9	4038	4038	1345	1345	36	43	43.1	38.66	0.00825	0.00967	0.00842	0.00967	0.00842	0.00967	0.00842	0.00967	0.00017	0	0.00025	0	0.00025	0	0	0	0.29223	0.29651	NM_001251817.1
152	tex11	Testis-expressed protein 11	2763	2763	920	920	29	50	49.5	43.19	0.02027	0.02935	0.02027	0.02935	n.a.	n.a.	n.a.	n.a.	n.a.	n.a.	n.a.	n.a.	n.a.	n.a.	n.a.	n.a.	0.35737	0.38958	XM_018096967.1
153	tex12	Testis-expressed protein 12	354	354	117	117	5	38.7	39.6	n.a.	0.01412	0.02564	0.01412	0.02564	0.01412	0.02564	0.01412	0.02564	0	0	0	0	0	0	0	0	n.a.	n.a.		AF285582.1
154	tex14	Testis-expressed protein 14 like	3369	3381	1122	1126	26	40.1	40	37.66	0.01098	0.01872	0.01098	0.01872	0.01098	0.01872	0.01098	0.01872	0	0	0	0	0	0	0	0	0.53783	0.69332	NM_001128646.1
155	topbp1	DNA topoisomerase 2-binding protein 1	4548	4548	1515	1515	27	44.1	44	43.34	0.00989	0.00968	0.00989	0.0099	0.00989	0.00924	0.00989	0.0099	0.00029	0.00044	0.00044	0.00066	0	0	0.00044	0.00066	0.26288	0.24685	XM_002937745.3
156	trip13	Pachytene checkpoint protein 2 homolog	1299	1299	432	432	13	38.4	38.5	38.17	0.01309	0.00926	0.01309	0.00926	0.01309	0.00926	0.01309	0.00926	0	0	0	0	0	0	0	0	0.25309	0.21919	XM_012964448.2
157	ttk	Dual specificity protein kinase TTK	2628	2622	875	873	18	40.5	40.6	40.61	0.01756	0.02408	0.01756	0.02408	0.01756	0.02408	0.01756	0.02408	0	0	0	0	0	0	0	0	0.28457	0.31613	XM_012963159.2
158	wee1	Wee1-like protein kinase	1731	1731	576	576	11	56.4	56	56.64	0.01502	0.00579	0.01675	0.00521	0.01733	0.00521	0.01098	0.00694	0.01348	0.00579	0.00058	0	0.01964	0.00868	0.02022	0.00868	0.26396	0.21066	NM_001126965.1
159	ywhaz	14-3-3 protein zeta/delta	741	741	246	246	5	46.9	47.1	45.93	0.00405	0	0.00405	0	0.00405	0	0.00405	0	0	0	0	0	0	0	0	0	0.17344	0.10612	NM_203842.1
160	zfp36	mRNA decay activator protein ZFP36	1134	1131	377	376	2	58.4	57.6	50.11	0.01474	0.00443	0.01415	0.00266	0.01415	0.00266	0.01592	0.00798	0.00118	0.00355	0	0	0.00177	0.00532	0.00177	0.00532	0.55918	0.12886	NM_001113071.1
							x̅	46.0687	45.9468	45.8873	0.0113621	0.0100936	0.0111792	0.00991112	0.011528	0.00997264	0.0114046	0.0100603	0.00219539	0.00175	0.00202081	0.00174798	0.00249007	0.00211802	0.00225517	0.00155504	0.26917	0.238008
							σ	4.57604	8.44033	7.30446	0.0059171	0.00965715	0.0062681	0.00984068	0.00658094	0.0098265	0.00663237	0.00979679	0.00299557	0.0031157	0.00364394	0.00397174	0.00376115	0.00406232	0.00321915	0.00294461	0.100999	0.170978
							GC concent Pelophylax spp.
							x̅	46.0085
							σ	6.80809

## Sheet: Explanation
Detailed characteristics of 160 gametogenic (page 1) and 20 respiratory genes (page 2) obtained from transcriptome libraries.
Genotypes: LL - Pelophylax lessonae, RR - P. ridibundus, Xen - Xenopus tropicalis
CDS length: length of the coding sequence given in nucleotides (nt).
Protein length: length of the translated sequence given in amino acids (aa).
EXN: estimated number of exons, inconsistent results are marked with "?", n.a. - not available.
p-distance: uncorected pairwaise distances given as a measure of interspecific (LL-RR) and intraspecific (RR-RR) genetic divergence for nucleotides and amino acids.
	x̅ (Xen - Pelophylax spp.): average pairwise distance between X. tropicalis and both Pelophylax species.
